# Supplementary material for: Different adaptive patterns of wheat with different drought tolerance under drought stresses and rehydration revealed by integrated metabolomic and transcriptomic analysis
Source: Front Plant Sci. 2022 Oct 13;13:1008624. doi: 10.3389/fpls.2022.1008624 (PMC9608176; doi:10.3389/fpls.2022.1008624)
Supplement: Supplementary file 2 [file Table_2.XLSX]

## Sheet: Sheet1
Supplementary Table 4. Metabolites in sub classes 6 and 13 as identified by K-means.
ID	Sub Class	Formula	Compounds	Class Ia	Class IIb	CASc	Leveld	CK1-1	CK1-2	CK1-3	CK2-1	CK2-2	CK2-3	CK3-1	CK3-2	CK3-3	CK4-1	CK4-2	CK4-3	Mu1-1	Mu1-2	Mu1-3	Mu2-1	Mu2-2	Mu2-3	Mu3-1	Mu3-2	Mu3-3	Mu4-1	Mu4-2	Mu4-3	mu1-1	mu1-2	mu1-3	mu3-1	mu3-2	mu3-3
mws4085	6	C11H12O5	Sinapic acid	Phenolic acids	Phenolic acids	530-59-6	A	129340	137720	155060	289530	390970	393510	123820	82767	126430	98184	35449	91445	164590	131430	164120	527100	417900	451720	317090	115680	221260	102200	451300	269560	196080	218270	185170	102030	88381	81610
pmb0490	6	C13H18N2O2	p-Coumaroylputrescine	Alkaloids	Phenolamine	34136-53-3	A	1358100	1865800	1646600	1313700	1287900	1398300	879370	478170	680750	1299000	1280000	1490500	3091600	4303800	4221100	10699000	5902800	9111200	2788600	3306800	3071500	2731400	4361900	3178500	5847500	2543800	4096000	1414000	2680700	2080400
mws0049	6	C15H14O7	Gallocatechin	Flavonoids	Flavanols	970-73-0	B	9	9	9	9	9	6456.2	9	9	9	9	49007	9	3101.3	84203	9	151090	9	9	9	9	9	9	9	9	9	9	9	9	9	5025.6
pmb4777	6	C16H18O8	4-Hydroxy-7-methoxycoumarin-β-rhamnoside	Lignans and Coumarins	Coumarins	-	B	80982	97684	97442	30772	36727	39353	40200	22999	31132	13396	20064	15509	140780	142890	149400	167240	212300	188110	81713	103050	84836	88495	65309	77180	104740	95794	97066	48047	25907	36961
mws0178	6	C16H18O9	Chlorogenic acid*	Phenolic acids	Phenolic acids	327-97-9	B	83210	95818	123320	15344	14240	57968	32811	164880	124840	101460	739420	29364	174340	1466000	159780	3469600	106300	75474	26734	18232	245400	69556	48783	55276	81641	85602	59230	20067	99133	28930
mws2108	6	C16H18O9	Cryptochlorogenic acid*	Phenolic acids	Phenolic acids	905-99-7	B	39204	52707	36460	31073	25552	20990	29125	32579	26692	18312	32305	22420	128250	150720	134020	145360	113540	128250	62300	60155	93465	69506	53441	63095	54859	35274	49992	24452	20499	33780
pmp000581	6	C23H22O11	Apigenin-7-O-(6'-O-acetyl)-β-D-glucoside	Flavonoids	Flavonoid	-	B	11047	6609.8	10502	7692.7	7390.9	6790.8	5464.3	2819.7	5211.7	9399.3	87753	11340	8537.6	197360	10170	476430	2934.7	7248.4	12424	9119.1	26690	24191	16796	17774	16980	5604.5	9776.6	5681.4	35781	19902
pmf0424	6	C25H24O12	Isochlorogenic acid B	Phenolic acids	Phenolic acids	14534-61-3	B	27503	26509	32215	48200	34177	51313	39302	69125	43541	46518	101880	45445	16213	191670	8663.2	325870	20019	27179	27483	27928	51513	28215	36269	24258	23556	18762	17108	35078	44939	36728
pmp000585	6	C24H22O13	Apigenin-7-O-(6-O-Malonyl Glucoside)	Flavonoids	Flavonoid	-	B	18558	21949	22932	23474	25406	19837	16384	25474	20448	20945	112540	20533	18001	264760	20145	520270	22214	29868	32252	33479	64796	35672	31562	35324	18146	15214	17255	14923	31198	20014
pme1665	6	C27H30O15	Isovitexin 7-O-glucoside(Saponarin)	Flavonoids	Flavonoid carbonoside	20310-89-8	A	1076000	865450	1093800	1034900	1264200	1263400	505690	570160	543020	961880	838990	885100	1192200	1329900	1337000	1964100	1445300	1605300	1341400	1405100	1244100	1220100	901790	1060700	1284500	1022300	1175600	655640	753810	827960
mws0183	13	C7H6O4	Protocatechuic acid	Phenolic acids	Phenolic acids	99-50-3	A	572320	553340	672740	77779	92282	95232	115160	139840	150130	185670	223990	196390	2041100	2804200	2614500	251620	1452300	968120	156880	1903600	986450	2154100	3661500	2773500	1031100	488150	828340	142010	328000	241420
mws2212	13	C9H8O4	Caffeic acid	Phenolic acids	Phenolic acids	331-39-5	A	116850	96563	116760	91253	96648	86088	82868	48301	75382	74880	101010	95907	1735200	2277000	2158400	141340	981660	639070	66269	1426800	684620	1425800	2131100	1771300	120560	95851	131130	87368	76959	75305
Hmtn001120	13	C14H20O8	5-(2-Hydroxyethyl)-2-O-glucosylohenol	Phenolic acids	Phenolic acids	-	B	99383	181610	148690	101870	77790	98625	135850	146260	88689	109440	133670	127400	399310	441240	424390	419400	316790	448150	524060	501650	503190	483420	519100	482640	287180	258690	259660	147240	236570	171220
Hmlp002485	13	C14H17NO9	DIBOA-Glucoside	Alkaloids	Alkaloids	-	B	41688	63281	54255	21506	8445.6	31689	140590	21182	78411	18836	17447	9	167240	168050	173370	155400	181450	208200	157630	148670	191500	187970	145090	178840	43291	52175	40004	41530	16543	26966
Zmln000899	13	C15H20O9	Syringic Aldehyde-glucoside	Phenolic acids	Phenolic acids	-	B	725650	527150	570490	657710	687120	676390	1681900	1036100	1478100	650420	604020	637020	2113700	1838300	2246000	1943900	2520500	2295600	2132500	2181000	2386300	2466000	3001400	2799700	841060	917600	856580	1112400	1147700	1115100
pmb0752	13	C17H20O9	3-O-Feruloyl quinic acid	Phenolic acids	Phenolic acids	1899-29-2	B	248470	221110	215370	196810	292670	344210	707660	877950	740700	530880	469050	581390	533610	669550	684560	993630	1640500	1401200	1229800	1103900	1062500	833890	596610	735990	373140	339050	372760	428970	558770	353530
Lmhn002573	13	C17H20O11	sinapoylglucuronic acid	Phenolic acids	Phenolic acids	-	B	1202400	1459700	1482300	1250600	1450200	1297900	2363200	1137400	1707000	1583100	1428100	1559700	1656200	1727100	1965800	2728000	2524700	2777200	3327600	2821000	3010400	2633400	2467200	2627000	817800	1034100	941480	1738200	636300	1099200
pmn001668	13	C21H20O9	Apigenin-3-O-rhamnoside	Flavonoids	Flavonoid	-	A	59831	66776	49892	82067	66688	87022	83794	84674	67523	82329	82450	98774	820750	1003300	1018500	118410	683800	421800	140260	867200	419370	839150	1232700	1021500	116500	73638	110800	94645	191130	144250
mad1424	13	C17H14O13	Ditartaroyl-hydroxylcoumarin	Phenolic acids	Phenolic acids	-	B	23671	36699	38149	53620	40807	29445	56642	25691	47678	38272	31336	32619	106060	100260	123350	86534	85317	111070	91505	66372	90566	73689	101160	90852	38860	32105	40900	42348	55545	49334
pme3391	13	C22H23O12+	Petunidin-3-O-glucoside	Flavonoids	Anthocyanins	6988-81-4	B	26295	22155	15860	14197	19157	26896	65951	11682	45055	18564	24616	22145	64318	71876	88696	108760	119560	90591	159740	125600	142860	129130	169750	150670	13356	24422	23435	45040	13988	23820
pmn001712	13	C22H34O12	3-Hydroxy-4-isopropylbenzylalcohol 3-glucoside-glucoside	Phenolic acids	Phenolic acids	-	B	528310	456790	406390	465530	716100	567830	792280	557290	713910	548140	462320	580560	1092600	1172500	1105300	1214400	1407600	1295300	1379500	1291200	1307100	1227000	1210800	1232400	694000	575450	658080	839680	515930	571060
pmn001710	13	C24H26O13	Rosmarinyl Glucoside	Phenolic acids	Phenolic acids	-	B	259480	224140	244720	152970	213520	183460	278440	202800	247530	140810	160530	169200	315340	278670	308190	238550	300190	267840	371200	400810	386720	319510	325250	382800	238940	298550	240770	179610	158480	195750
pmb0608	13	C25H24O14	Chrysoeriol-O-malonylhexoside	Flavonoids	Flavonoid	-	A	1256900	1507300	1400300	1276900	1450800	1456300	1040300	1046600	1068900	1088000	1206900	1212500	1897100	1886900	2072200	2295300	2021500	2374000	2123300	2184600	2051000	2035800	2125000	2228600	1446200	1206400	1368800	1320000	1249100	1299200
Lmgp004474	13	C27H30O14	5,7,4'-trihydroxy isoflavone-7-O-galactoside-rhamnose	Flavonoids	Isoflavones	-	B	1054300	1211100	1149400	899410	1004000	996370	672550	866690	798990	807780	811210	778680	1719500	1689100	1806200	1540200	1593200	1504300	1546700	1608300	1567400	1638100	1905200	1706100	884680	716840	841480	468560	410800	436960
pmb0631	13	C26H28O15	C-Hexosyl-luteolin C-pentoside	Flavonoids	Flavonoid carbonoside	-	B	3186600	4389000	4331100	3540800	3369300	3989700	2563100	2181100	2454500	3333200	3162900	3308400	5231400	4510400	5797900	4948500	5089300	5428700	4824400	5215000	5123500	4556500	5224900	5774900	3207800	4276200	3592300	4654400	2697600	3514400
pmb2936	13	C28H32O14	Disinapoyl hexoside	Phenolic acids	Phenolic acids	-	B	56995	33931	55974	23191	30066	26964	11668	12230	13181	7644.8	7250.9	7321.1	79456	88396	84654	96294	202520	162420	92052	78576	81652	130780	83044	104630	68981	70421	70794	35262	12445	23951
Lmpp003789	13	C30H27O13+	Cyanidin-3-O-(6''-p-Coumaroylglucoside)	Flavonoids	Anthocyanins	-	B	50803	62075	54438	57214	54746	58238	135500	77513	101640	56906	87283	68145	72582	131940	90906	166530	85340	87435	95105	97882	103990	101450	116180	123050	42047	43761	43942	40078	42400	37003
Lmpp003815	13	C31H29O14+	Petunidin-3-(6''-p-Coumaroylglucoside)	Flavonoids	Anthocyanins	-	B	150680	197030	187760	153140	166210	144920	232310	214280	214240	140970	140760	155570	207440	223360	197270	278060	297450	268800	291810	304560	296650	279800	387840	331880	104910	169900	142270	135090	96840	110470
pmb0578	13	C32H30O15	Luteolin-O-sinapoylhexoside	Flavonoids	Flavonoid	-	B	204200	213100	238180	109010	104380	111980	74595	57760	76658	78528	73111	79043	1562100	1284000	1631600	850840	1247900	1202500	1046600	1154900	1093500	931990	880640	1102800	379820	316440	316850	210110	99203	175580
pmb0684	13	C32H30O15	C-Hexosyl-luteolin O-sinapic acid	Flavonoids	Flavonoid carbonoside	-	A	173340	209660	214250	104280	84328	99974	71922	48717	53176	68190	66403	69647	1495700	1193200	1414900	1018200	1072800	1063500	939500	1002600	967360	929120	892890	938380	329910	254870	300440	223320	98029	144660
pmb0579	13	C33H32O15	Chrysoeriol-O-sinapoylhexoside	Flavonoids	Flavonoid	-	A	208850	182740	213160	164950	156740	153070	126150	120300	111250	145000	126200	129640	807360	733330	798140	804480	1117800	995550	913170	940430	935200	915070	982410	878860	330150	274030	291000	445170	248450	318270
Hmgp002564	13	C29H30O19	Tricin 7-O-Diglucuronoside	Flavonoids	Flavonoid	83097-44-3	B	9	19049	6555.7	9	9	9	37211	9	16290	6704.2	7841.4	4414.7	10929	31678	13744	52533	25006	27111	25022	19458	26841	19560	35377	27995	9	9	9	9	9	9
pmb0738	13	C34H34O16	Tricin 7-O-[sinapoyl]-glucoside	Flavonoids	Flavonoid	-	A	140260	174730	173980	222530	181030	147990	173320	127720	150090	153730	112530	169130	258810	312010	386050	907320	672300	897460	910850	746670	1026600	737180	667610	911000	196840	232040	175980	226700	118010	189260
pmn001369	13	C32H42O17	1-Hydroxypineolin Diglucoside	Lignans and Coumarins	Lignans	-	B	5496.8	7923.9	4541.1	4308.4	10255	8655.4	13624	3075.7	6708.1	6590.1	6548.9	5242.2	11566	16747	17726	19147	19177	12220	16416	18144	22727	25248	19375	19872	5658.7	11835	10154	11237	9461.1	8014
pmb0613	13	C33H40O20	Apigenin 6-C-hexosyl-8-C-hexosyl-O-hexoside	Flavonoids	Flavonoid	-	A	47528	56235	61077	49185	49902	48884	30705	45768	42435	41719	54716	56904	156110	115030	156970	134670	107890	144940	112530	120800	119980	91598	68373	91705	69265	50000	57267	33878	35555	28957
a Primary class of the metabolites
b Secondary class of the metabolites
c CAS Registry Number
d Identification level of the metabolites, A: the secondary mass spectrometry of the sample substance and retention time (RT) of the metablites are consistent with the database; B: The precursor ion molecular weight(Q1), characteristic fragment ions (Q3), RT, declustering potential (DP), and collision energy (CE) of the metablites are consistent with the database
