# Supplementary material for: Different adaptive patterns of wheat with different drought tolerance under drought stresses and rehydration revealed by integrated metabolomic and transcriptomic analysis
Source: Front Plant Sci. 2022 Oct 13;13:1008624. doi: 10.3389/fpls.2022.1008624 (PMC9608176; doi:10.3389/fpls.2022.1008624)
Supplement: Supplementary file 11 [file Table_11.XLSX]

## Sheet: Sheet1
Supplementary Table 2. Metabolites identied from 30 wheat samples.
ID	Q1 (Da)	Q3 (Da)	Molecular Weight (Da)	Formula	Ionization model	Compounds	Class Ia	Class IIb	CASc	Leveld	CK1-1	CK1-2	CK1-3	CK2-1	CK2-2	CK2-3	CK3-1	CK3-2	CK3-3	CK4-1	CK4-2	CK4-3	Mu1-1	Mu1-2	Mu1-3	Mu2-1	Mu2-2	Mu2-3	Mu3-1	Mu3-2	Mu3-3	Mu4-1	Mu4-2	Mu4-3	mu1-1	mu1-2	mu1-3	mu3-1	mu3-2	mu3-3
pme2601	89	59	90.032	C3H6O3	[M-H]-	3-Hydroxypropanoic acid	Organic acids	Organic acids	503-66-2	B	15110	12362	10626	12995	8776.2	13265	10217	10120	7928.5	8425	7587.8	11165	16391	8938.5	9585.8	11529	8116.6	8935.2	13398	8281.6	7370.3	11908	9477.9	8342.9	14548	17763	18229	12947	15012	9794.5
pme3011	104.07	68.8	103.063	C4H9NO2	[M+H]+	γ-Aminobutyric acid	Organic acids	Organic acids	56-12-2	B	727180	971150	963710	2296900	1608800	1973600	1103200	790670	912590	690690	382220	508700	499670	593170	652760	1228200	870110	1077400	1019200	645370	793720	468260	730330	595540	2563700	1180900	1682700	1510100	2608000	2350300
pme3017	104.07	58	103.063	C4H9NO2	[M+H]+	2-Aminoisobutyric acid	Amino acids and derivatives	Amino acids and derivatives	62-57-7	B	342940	431960	439620	1111700	1031900	1085900	580220	428270	540440	425950	331810	372240	549290	440570	451180	518540	474250	530530	716000	466350	612780	215420	619720	387530	686770	591980	601550	714970	835570	773820
pme3033	104.07	86	103.063	C4H9NO2	[M+H]+	N,N-Dimethylglycine	Amino acids and derivatives	Amino acids and derivatives	1118-68-9	B	293040	330050	320310	844080	709540	778290	392920	314360	390680	247740	173020	203700	239590	257020	239820	461510	334700	372000	421660	305940	296980	185060	300470	219770	844960	350170	620300	640670	1130200	1051700
pmb0484	104.1	60.1	103.091	C5H13NO	[M+H]+	Choline	Alkaloids	Alkaloids	62-49-7	B	3159200	4317400	3825400	6034900	6504100	6239100	4410300	2791900	3513100	3877700	2739000	3361400	4449700	3686300	4327000	4688900	3668800	4091900	3834300	2778000	3777400	1623800	5161800	3494800	6167300	5525700	5770900	3062600	5545900	4380400
mws0576	103.04	59.1	104.047	C4H8O3	[M-H]-	3-Hydroxybutyrate	Organic acids	Organic acids	300-85-6	B	1238100	1492000	1161400	1465700	1448400	1330900	1613900	993180	1251800	1149700	1040400	1192800	2039200	1788500	2060400	1699900	1215400	1400200	1357100	1437700	1407900	1933100	1523800	1711400	1762800	1303000	1465000	1334600	842810	815690
pme1975	103	59	104.06	C3H4O4	[M-H]-	Malonic acid	Organic acids	Organic acids	141-82-2	B	1285500	1459500	1156700	1432000	1369500	1272900	1568200	973410	1221600	1196900	1122400	1142700	1901200	1918300	1963400	1555800	1137900	1433700	1258300	1242200	1210900	1907300	1604100	1792000	1707800	1322500	1429100	1291700	870560	822510
pme0010	106	60	105.043	C3H7NO3	[M+H]+	L-Serine	Amino acids and derivatives	Amino acids and derivatives	56-45-1	B	3338300	3408600	3514300	3003100	2522000	2969900	2845000	2917200	2486400	1939600	1937800	1587400	2462000	3399000	2438400	2317400	1934300	2297300	3179900	3033700	2905600	1895200	1997000	1908300	3199000	3716600	3587600	2893900	2702100	2377800
mws0255	112.05	95	111.043	C4H5N3O	[M+H]+	Cytosine	Nucleotides and derivatives	Nucleotides and derivatives	71-30-7	B	280070	319850	349270	260100	358220	313460	262220	164870	195820	237050	234080	207940	287080	274490	303030	315790	240410	285720	308150	157150	236600	179030	263280	185780	344460	288930	276090	178060	225630	174670
pme2122	112.09	95	111.08	C5H9N3	[M+H]+	Histamine	Amino acids and derivatives	Amino acids and derivatives	51-45-6	B	9	9	4234.6	29888	27649	33581	19552	8920.4	11273	13818	10824	17607	3375.9	9	9	27336	24863	21294	33202	24316	28089	15806	32826	20938	9	14731	4667	22591	12882	17409
pme0257	111.02	80	112.027	C4H4N2O2	[M-H]-	Uracil	Nucleotides and derivatives	Nucleotides and derivatives	66-22-8	B	151170	131000	150170	98501	74275	80555	86044	79779	67489	88545	98006	83849	170640	150210	137350	99066	83189	82942	84974	82635	83006	96533	90234	100430	124950	116660	112760	98557	73901	44812
pme0006	116.07	70.1	115.063	C5H9NO2	[M+H]+	L-Proline	Amino acids and derivatives	Amino acids and derivatives	147-85-3	B	327910	418830	403620	3226700	1685300	2577800	623970	1023600	877550	477970	223570	350360	305670	247810	261980	587600	370040	449890	1937800	1029400	1467200	363610	2514600	1276600	5446100	6512500	5932800	2737300	12907000	8788900
mws0376	115	71	116.011	C4H4O4	[M-H]-	Fumaric acid	Organic acids	Organic acids	110-17-8	B	687230	322880	553460	376180	247450	261630	232620	93679	129220	333210	620720	482270	597980	636910	615150	273300	102940	193190	266350	232730	233400	670170	408330	494730	1142900	250020	794030	305230	798580	560450
pmb1096	118.07	91	117.058	C8H7N	[M+H]+	Indole	Alkaloids	Plumerane	120-72-9	A	12683	30835	21063	323620	269600	300740	163640	130820	159570	198420	240410	243970	23994	18783	21034	235350	183850	197910	257650	217090	254380	111310	222010	155720	55764	51586	59928	175550	319940	250280
mws0191	118.09	59	117.079	C5H11NO2	[M+H]+	Betaine	Alkaloids	Alkaloids	107-43-7	B	50295000	56441000	65561000	63020000	60983000	63156000	62590000	47868000	48897000	62043000	58595000	48527000	60181000	62497000	55943000	66238000	64998000	62641000	69477000	67165000	65950000	75312000	69912000	69178000	63773000	56815000	62813000	62506000	56286000	65109000
pme0120	118.09	101	117.079	C5H11NO2	[M+H]+	5-Aminovaleric acid	Amino acids and derivatives	Amino acids and derivatives	660-88-8	B	22705	17037	18547	42775	28818	46811	24225	9680.2	21168	13532	18171	14294	23816	21675	24696	23743	21863	24490	25148	18456	26843	15786	19406	21879	45979	20065	28535	31292	37580	45843
mws0256	118.09	72.1	117.079	C5H11NO2	[M+H]+	L-Valine	Amino acids and derivatives	Amino acids and derivatives	72-18-4	B	46531000	51088000	49884000	82039000	76511000	78254000	57869000	55916000	60694000	40652000	45941000	44699000	46075000	45403000	49618000	61465000	58047000	63727000	67198000	61335000	64564000	48995000	51172000	47031000	54791000	52596000	53805000	73035000	83177000	74573000
pme1730	117	59	118.027	C4H6O4	[M-H]-	D-Erythronolactone	Organic acids	Organic acids	15667-21-7	B	36781	8632.9	23955	2348.9	9	3063.8	9983.5	11601	8942.6	12109	13008	12471	38304	13133	23604	8227.7	11703	8853	9223.4	4698.3	7096.7	18090	23064	17165	14628	16933	10752	10283	33591	19773
mws0192	117.02	73	118.027	C4H6O4	[M-H]-	Succinic acid	Organic acids	Organic acids	110-15-6	A	28973000	38823000	34249000	17236000	14547000	16093000	20657000	16539000	18344000	18902000	16113000	18915000	36386000	39474000	40813000	24412000	20605000	21221000	13551000	20161000	15840000	30934000	25909000	27080000	42094000	37737000	39280000	22005000	32242000	26472000
mws0147	117.06	59	118.063	C5H10O3	[M-H]-	3-Hydroxy-3-methyl butyric acid	Organic acids	Organic acids	625-08-1	B	79365	79463	72073	228430	237380	236550	142410	104610	95152	88737	92283	83880	74508	68751	68753	122860	138930	114760	116200	110750	118750	81497	112300	92685	103990	103340	88175	136870	153390	148850
pme3096	118	74	119.022	C3H5NO4	[M-H]-	Aminomalonic acid	Organic acids	Organic acids	1068-84-4	B	1028300	1485800	1337500	674580	546060	604790	798070	678550	704010	739000	614870	720250	1327200	1460000	1445900	906110	778560	783290	500570	741610	586410	1191200	959890	1011200	1548400	1408200	1513100	807530	1200700	1021000
mws0671	120.07	74.1	119.058	C4H9NO3	[M+H]+	L-Homoserine	Organic acids	Organic acids	672-15-1	B	1499400	1749300	1755400	2862200	2413400	2730100	1630000	1403100	1397800	1116900	1123800	1032000	1436700	1620300	1427400	2272700	1884400	2086700	2126600	1763100	1919100	1105400	1100600	1070500	1735800	1770200	1654500	2016400	1393500	1465300
mws0230	120.07	74	119.058	C4H9NO3	[M+H]+	L-(-)-Threonine	Amino acids and derivatives	Amino acids and derivatives	72-19-5	B	1721200	1917000	1998500	2834600	2352100	2876100	1848600	1593900	1387100	1191300	1143000	1020500	1643200	1773300	1918300	2372900	1977400	2177400	2118500	1681700	1912100	1111200	1191600	1161900	1894300	1712200	1809100	2388800	1504300	1513000
pmp001287	120.08	103.05	119.073	C8H9N	[M+H]+	N-Benzylmethylene isomethylamine	Alkaloids	Alkaloids	-	A	12555000	14607000	13389000	38824000	38329000	39473000	26030000	27443000	27325000	17237000	20838000	19056000	11757000	10538000	11708000	25608000	26858000	26616000	36767000	31510000	34776000	13624000	22390000	17824000	19140000	15848000	17620000	30381000	43422000	37391000
pma0134	121.04	93.06	120.042	C4H8O4	[M+H]+	D(-)-Threose	Others	Saccharides and Alcohols	95-43-2	B	71076	44662	61582	24365	17630	20224	15893	23155	15958	35817	164110	109120	55981	56875	66834	20953	23707	25242	19091	12506	14492	22235	21074	16363	53027	45378	48836	12126	41610	27382
pme0195	120.02	62	121.02	C3H7NO2S	[M-H]-	L-Cysteine	Amino acids and derivatives	Amino acids and derivatives	52-90-4	B	213890	55733	122810	34555	28986	28478	54433	88270	57294	70174	69867	69089	262110	72359	137800	46152	87324	63473	63049	71961	80092	114200	195100	139980	68310	94967	81351	58929	268430	148380
mws0491	122.1	105	121.089	C8H11N	[M+H]+	Phenethylamine	Others	Others	64-04-0	B	1110000	1456400	1251700	554130	467530	525290	1333000	202950	813430	355870	433450	413910	1225800	1180000	1247800	837000	1152800	1079000	743450	802920	768630	690060	752890	764290	1115300	1231000	1120900	617670	1266400	952540
mws0628	121.03	92	122.037	C7H6O2	[M-H]-	4-Hydroxybenzaldehyde	Phenolic acids	Phenolic acids	123-08-0	A	426720	357010	412560	330090	265570	303380	312420	485280	426240	304480	383330	340850	370640	417760	397370	281810	465230	456110	267150	286890	299030	388130	354100	390040	600520	429790	517690	507400	692380	561920
pme0241	123.04	79	122.037	C7H6O2	[M+H]+	Benzoic acid	Phenolic acids	Phenolic acids	65-85-0	B	27400	25498	19634	10369	33187	18074	23281	25608	16553	13675	26337	11257	37764	17997	20198	9833.8	26323	20602	21803	35299	16821	27876	15606	15125	39766	32846	36796	17894	40264	36988
mws0133	123.06	79.9	122.048	C6H6N2O	[M+H]+	Nicotinamide	Others	Vitamin	98-92-0	A	4246600	3980700	4566300	2253600	2367300	2407200	2737700	1644700	2119000	2245800	2475200	2331700	4283900	4797400	4741900	2830000	3128800	3085100	2395600	2642700	2373900	3026900	3531600	3307800	5532100	3633600	4359800	2497300	3297900	2768800
pme2134	121	59	122.058	C4H10O4	[M-H]-	Threitol	Others	Saccharides and Alcohols	7541-59-5	B	881110	941920	947350	983450	952600	921130	968800	924240	920260	825770	950630	914090	1071300	947740	882430	977770	1004600	950640	791780	930460	1080600	930820	898890	849830	957590	905120	1055500	1029800	741400	860070
pme1216	122.03	78	123.032	C6H5NO2	[M-H]-	2-Picolinic acid	Organic acids	Organic acids	98-98-6	B	71628	68709	66050	124950	155690	121800	111660	52133	77934	75563	51729	71578	90996	92574	83201	94759	87047	103300	111450	44983	88442	48814	160890	92784	170000	111970	131360	66522	219200	138740
pme0490	124.04	78	123.032	C6H5NO2	[M+H]+	Nicotinic acid	Others	Vitamin	59-67-6	B	343100	346560	363530	261850	308340	272970	342870	162110	299610	354010	231460	283700	386480	382890	417280	262860	309170	316740	256060	112540	248070	176830	486450	356210	656580	459760	584200	172010	464890	352320
mws0572	126.07	109	125.059	C5H7N3O	[M+H]+	5-Methylcytosine	Nucleotides and derivatives	Nucleotides and derivatives	554-01-8	A	40157	19378	30730	50551	40632	38003	28674	36847	35421	49824	54743	57282	30123	21785	28123	31803	31134	30060	65160	23652	49717	25921	42237	42268	48253	29202	42165	32717	88320	63579
pmb0302	126.1	96	125.1	C2H8NO3P	[M+H]+	2-Aminoethylphosphonate	Lipids	Glycerol ester	2041-14-7	B	9533.5	16784	23815	29152	16798	17081	17829	18719	19178	19175	17568	21364	24620	10814	25446	11971	12127	13591	16014	15559	8494.2	22529	25788	18560	45901	24708	39364	18328	69529	46354
pmp000509	127.04	109.02	126.032	C6H6O3	[M+H]+	Maltol	Others	Others	118-71-8	B	162260	168530	200300	117480	193090	158500	139650	129900	137170	165210	157510	133960	142420	149100	146110	101210	157910	143160	140300	165580	135330	105630	150780	211010	223210	189630	118380	144020	110610	144680
Wmhn001892	125	79	126.032	C6H6O3	[M-H]-	Pyrogallic acid	Phenolic acids	Phenolic acids	87-66-1	B	459030	354980	285960	301850	327520	385090	237130	402760	345280	420190	525150	247400	420190	428810	235430	307070	466340	308440	375150	251560	304230	339210	277750	339200	295440	270000	367970	349150	282040	274140
pmp001086	127.04	97	126.032	C6H6O3	[M+H]+	5-Hydroxymethylfurfural	Phenolic acids	Phenolic acids	67-47-0	B	461590	440280	624470	152340	176780	199340	256090	317780	313410	276560	302250	218150	412720	347370	405840	212290	115600	156590	152990	182410	157070	144320	83119	135940	358980	251370	347300	137500	58880	76154
mws0251	127.05	110	126.043	C5H6N2O2	[M+H]+	Thymine	Nucleotides and derivatives	Nucleotides and derivatives	65-71-4	A	345740	162530	285160	158720	118520	141350	173500	114610	128330	176160	276050	212650	230210	220170	233700	127080	83497	100450	140730	133090	126930	274430	163850	201620	450820	133760	289930	209310	438810	313550
mws0263	128.04	82.03	129.043	C5H7NO3	[M-H]-	L-PyroglutamicAcid	Amino acids and derivatives	Amino acids and derivatives	98-79-3	B	9946.1	4828.6	8101.8	6542.7	3859.8	6819.9	1415.6	2057.4	2537.9	8555.6	4172.6	7678.5	6896	5181	6269.4	4984.3	2085.4	2723.6	5421.4	3609.7	5530.6	3964.6	6299.9	8267.3	12473	15684	17481	12947	17248	13440
Rfmb319	130.09	84.08	129.079	C6H11NO2	[M+H]+	Pipecolic acid	Amino acids and derivatives	Amino acids and derivatives	4043-87-2	B	4353800	6720500	5408800	11405000	14477000	12595000	6128700	3510500	5128600	6743600	4818000	6166300	3611600	3865800	4045300	6812400	4872800	6125800	11374000	10815000	10742000	9002800	15247000	11521000	38009000	30177000	32020000	17145000	36206000	28602000
mws0425	129.02	85	130.027	C5H6O4	[M-H]-	Citraconic acid	Organic acids	Organic acids	498-23-7	B	5366000	2199700	4211700	2035000	1873400	1838800	1836500	612750	1174300	1914500	3473500	2801100	3475600	4337900	3940200	2051600	738560	1502700	1424200	1579300	1559800	3371100	1854600	2492100	8897400	1968500	5783200	1812700	4379500	3236100
pme2693	131.12	114.09	130.111	C6H14N2O	[M+H]+	N-Acetylputrescine	Alkaloids	Phenolamine	18233-70-0	A	68156	39410	68886	124580	143660	153820	118230	207850	162640	149320	99420	123640	80175	50716	64096	89218	120950	100030	107920	111220	100990	104720	152320	107930	79491	94758	81562	156720	197790	160850
pmb0501	131.13	114.1	130.122	C5H14N4	[M+H]+	Agmatine	Alkaloids	Phenolamine	306-60-5	B	72823	50813	75777	149270	168600	184330	143870	218130	167520	147970	105280	134040	91377	54145	73855	81973	137950	122350	126620	123680	120130	123670	174170	149820	93891	105360	95492	192780	201400	177210
mws0712	130.05	86	131.058	C5H9NO3	[M-H]-	N-Propionylglycine	Amino acids and derivatives	Amino acids and derivatives	21709-90-0	B	2320200	2064200	3893200	2831700	3070500	2175100	2506100	2448000	2531700	2509500	2099600	2373300	2397200	2573800	2562000	2365900	1974900	2433600	2409000	2495300	2103600	2528600	2055600	2000200	2634900	2588300	2551500	2154400	1658300	1675500
pme2679	132	86	131.095	C6H13NO2	[M+H]+	L-Allo-Isoleucine	Amino acids and derivatives	Amino acids and derivatives	1509-34-8	B	11914000	16354000	14820000	66497000	63273000	64594000	45097000	37773000	35753000	11227000	17468000	10045000	8749300	10968000	8632000	56075000	50903000	35337000	60636000	56646000	46207000	17785000	14603000	17316000	22150000	20297000	18941000	60651000	57960000	52313000
pmp001198	132.1	57.1	131.095	C6H13NO2	[M+H]+	6-Deoxyfagomine	Alkaloids	Alkaloids	197449-09-5	A	3574400	4401600	4344500	20178000	18189000	20319000	13086000	12172000	14081000	4081700	5847000	5019800	4047200	3306100	3999700	15877000	14622000	17042000	18073000	16408000	19564000	5556300	9256100	7088100	6566400	5518100	6104500	17293000	17882000	17644000
mws1587	132.1	86	131.095	C6H13NO2	[M+H]+	α-Aminocaproic acid	Amino acids and derivatives	Amino acids and derivatives	327-57-1	A	422640	552850	468940	1682100	1613800	1704000	1219200	1080300	1099300	356510	443080	385620	447000	356080	446300	1356200	1299000	1301400	1599000	1538800	1607500	660880	844820	712410	493350	439200	419800	1454400	1535000	1481500
mws0258	132.1	86	131.095	C6H13NO2	[M+H]+	L-Isoleucine	Amino acids and derivatives	Amino acids and derivatives	73-32-5	A	846190	951740	846030	4318000	3643200	4486700	2754300	2689900	2864800	870770	1241400	1020400	854070	745180	801970	3493600	3380900	3710800	3860200	3550300	4226300	1134200	1865800	1533400	1429400	1202300	1342900	3640300	3753600	3967500
mws0227	132.1	86.2	131.095	C6H13NO2	[M+H]+	L-Leucine	Amino acids and derivatives	Amino acids and derivatives	61-90-5	A	913740	944940	892410	4645600	4078100	4620500	2953500	2772600	3021100	871740	1257400	1104400	885830	725300	915230	3669500	3394000	3907900	3958200	3641000	4450500	1268000	2045000	1516600	1427500	1223400	1307400	3696600	3888900	4115700
mws0473	131.03	87	132.042	C5H8O4	[M-H]-	2-Methylsuccinic acid	Organic acids	Organic acids	498-21-5	A	545570	490260	483040	510680	512840	524170	420360	295130	411190	573900	531410	573090	460930	622760	604900	329550	529190	490180	418090	385670	340820	534610	618490	521870	522140	782590	589270	677020	559080	598650
pme0243	131.04	87	132.042	C5H8O4	[M-H]-	Glutaric acid	Organic acids	Organic acids	110-94-1	B	96873	126750	99500	186790	147390	182800	137100	96605	102350	189450	188770	188290	203030	161490	201580	180490	199840	203770	142510	193230	101970	209600	242080	214060	338080	245200	285550	245120	613370	424770
mws0001	133.06	74	132.054	C4H8N2O3	[M+H]+	L-Asparagine	Amino acids and derivatives	Amino acids and derivatives	70-47-3	A	761490	1903300	1296700	12662000	7821800	10732000	2638800	606150	1315700	5385400	4847600	4139200	1621100	2359500	1946600	9473100	5448000	6541700	8646900	5163800	6162900	5136400	7643300	6645900	2721600	6636900	3966300	7198700	5516900	5194100
mws0972	131.07	85	132.079	C6H12O3	[M-H]-	5-Hydroxyhexanoic acid	Organic acids	Organic acids	185956-02-9	B	18058	15087	14311	18971	20942	19501	23732	11573	12258	13319	15040	13086	11603	10359	16518	19529	26687	26366	17378	12851	13753	11938	16376	10087	22568	18380	20113	17320	22376	14021
pme2527	133	116	132.09	C5H12N2O2	[M+H]+	L-Ornithine	Amino acids and derivatives	Amino acids and derivatives	70-26-8	B	21814	22869	29869	43336	35556	44414	20749	15780	19811	21055	23497	24164	17921	24656	27246	34143	28468	34907	32083	33015	33285	25045	36616	28598	28527	37317	33057	26155	32566	31597
mws0275	133.01	71	134.022	C4H6O5	[M-H]-	L-(-)-Malic acid	Organic acids	Organic acids	636-61-3	A	29741000	31732000	30231000	33519000	31305000	30514000	29831000	23634000	26012000	29185000	29960000	29106000	34443000	36131000	33958000	30713000	21113000	26372000	29189000	26394000	29625000	28869000	27393000	29020000	31863000	31958000	29726000	27145000	21672000	21006000
pme0057	136.04	118.1	135.035	C4H9NO2S	[M+H]+	DL-Homocysteine	Amino acids and derivatives	Amino acids and derivatives	6027-13-0	B	8439.5	9719	8579.6	9498.4	9923.3	4185.1	7079.7	63132	36434	8287.4	24487	16405	9015.6	5662	8981	8053.2	25908	22346	5958.9	9178	5626.9	3565.7	4073.6	6977.1	11517	24161	19183	10707	126580	69074
pme0040	136.06	119	135.054	C5H5N5	[M+H]+	Adenine	Nucleotides and derivatives	Nucleotides and derivatives	73-24-5	A	13962000	17455000	15877000	12354000	14302000	14678000	8774100	3931100	6649300	9188400	6985800	8401400	17374000	16859000	17452000	14197000	11032000	13056000	10827000	7557700	10397000	6645100	15077000	10609000	18427000	16538000	17165000	6304400	7744000	6534200
pme0033	137.05	119	136.039	C5H4N4O	[M+H]+	Hypoxanthine	Nucleotides and derivatives	Nucleotides and derivatives	68-94-0	B	259560	315790	293940	202890	264610	255330	157750	76041	111060	183300	142950	167380	320340	292020	327860	242600	205500	265150	176380	125600	175920	122290	252730	200490	333540	293030	325400	118090	220830	184970
pme1173	137.05	110	136.039	C5H4N4O	[M+H]+	Allopurinol	Nucleotides and derivatives	Nucleotides and derivatives	315-30-0	A	204590	229940	220290	157260	91052	124010	109910	108070	120970	138780	175760	128700	189110	169940	196170	71608	57053	60533	66777	66288	69845	120210	127850	109870	179250	165560	170130	137760	228880	169970
Hmbn002174	135.05	120.02	136.053	C8H8O2	[M-H]-	4-Hydroxyacetophenone	Phenolic acids	Phenolic acids	99-93-4	B	50367	32126	41879	64619	27844	45718	79061	69388	67168	29864	35908	23552	12906	21169	15039	13432	10452	8107	13046	12515	12611	10495	26238	16562	62282	61897	64045	62118	63779	55555
pme2268	138.05	94.07	137.048	C7H7NO2	[M+H]+	Trigonelline	Alkaloids	Alkaloids	535-83-1	B	8063000	6861300	7922300	8321000	7752800	8698000	7110300	6933700	7402600	8974700	7872700	8141900	6348600	6296800	6483100	6494400	7876900	7094200	7334800	7104000	6602800	6746500	6948800	6671200	7231000	7993100	7055400	8010000	8448200	7191400
mws1336	138.06	120	137.048	C7H7NO2	[M+H]+	4-Aminobenzoic acid	Phenolic acids	Phenolic acids	150-13-0	B	155610	239180	182170	14349	15944	8815.6	33539	19352	25285	42574	48783	53321	467480	383180	470170	65208	79250	83043	30058	45409	34111	84563	53129	56319	222390	179000	237190	31002	26660	27711
pme1002	138.09	103	137.084	C8H11NO	[M+H]+	L-Tyramine	Amino acids and derivatives	Amino acids and derivatives	51-67-2	A	1069700	861140	992850	628500	495020	602320	419260	809190	671770	1284500	7005000	4252900	1503200	1537100	1626000	453470	704420	758340	337400	319670	377540	511720	535410	517470	1049200	1378900	1208200	344810	1667000	1153800
Lmgn001670	137.03	108.02	138.032	C7H6O3	[M-H]-	Salicylic acid	Phenolic acids	Phenolic acids	69-72-7	B	56820	34786	39210	18800	21046	13937	19890	21997	19777	18337	33145	22663	32893	43702	37707	40722	27154	29730	20140	22812	22965	30705	24100	28812	55537	31954	50046	21916	34276	25796
mws0749	137.02	93	138.032	C7H6O3	[M-H]-	4-Hydroxybenzoic acid	Phenolic acids	Phenolic acids	99-96-7	B	888340	922550	941320	1502500	1550200	1587700	1286300	991830	1109500	832820	869970	951310	936500	980130	944760	1031000	1159600	1051500	1193800	692120	965000	741940	1182200	915120	2180200	1563100	1751000	1152800	2503400	1781400
pme1137	140.03	94	139.027	C6H5NO3	[M+H]+	6-Hydroxynicotinic acid	Alkaloids	Alkaloids	5006-66-6	B	9	9	6685.9	47246	35817	52342	11733	14369	15135	33509	32756	40758	16230	9	9556.9	33606	16663	31314	25924	30368	36921	38353	54368	51208	12907	9150.4	10727	32310	47908	45018
pme3207	141.02	59	142.027	C6H6O4	[M-H]-	Trans,trans-Muconic acid	Organic acids	Organic acids	3588-17-8	B	8098400	3802300	6187700	2366500	2198000	2127100	2386800	2759900	2711200	2939900	3000600	2998000	8344500	4399300	5997500	2840800	3717600	3162900	3215800	3051500	3326900	4116900	5788400	4786600	4015400	4707900	4327600	3122900	4649100	4013500
pmb0764	144.05	113.2	143.04	C6H9NOS	[M+H]+	4-Methyl-5-thiazoleethanol	Others	Others	137-00-8	A	104940	59360	69159	58591	45987	39435	57421	17754	39160	46067	65321	63418	94151	94410	89015	63606	45917	62190	83219	61789	59450	119930	88474	97393	120760	52848	82804	59862	122780	97284
Rfmb320	144.1	84.08	143.095	C7H13NO2	[M+H]+	1,2-N-Methylpipecolic acid	Amino acids and derivatives	Amino acids and derivatives	7730-87-2	B	95984	2278300	1103600	117530	88708	129200	14347000	108540	7559900	189460	172520	161490	160470	115020	147130	104080	138130	120290	144180	134450	143680	138360	144780	102110	2475500	199120	1402900	7699200	228850	3130000
mws0340	143.03	111	144.042	C6H8O4	[M-H]-	2,3-Dimethylsuccinic acid	Amino acids and derivatives	Amino acids and derivatives	13545-04-5	B	38780	19456	34900	63672	65782	76285	57654	48742	58601	80961	63892	91842	78824	47385	73529	111210	94963	109530	146900	116120	153710	120140	232970	170450	137850	79292	102850	92269	479500	312700
mws0103	146.06	91	145.053	C9H7NO	[M+H]+	Indole-3-carboxaldehyde	Alkaloids	Plumerane	487-89-8	B	344170	238550	290250	393680	268530	327220	199840	377370	286460	239240	362720	278170	272780	286900	319030	235940	413530	364100	244920	214380	222830	312860	318910	350590	563800	385620	503480	433900	876290	653120
pme0295	146.08	86	145.074	C6H11NO3	[M+H]+	4-Acetamidobutyric acid	Organic acids	Organic acids	3025-96-5	B	249100	448040	483630	1063100	721190	981910	366670	234970	334570	483670	324720	427990	273180	397140	397880	818780	603680	730620	456730	579200	510400	794300	825280	773830	1713000	725230	1321600	1022900	2781800	1832500
mws0567	146.09	87	145.085	C5H11N3O2	[M+H]+	4-Guanidinobutyric acid	Organic acids	Organic acids	463-00-3	B	1036200	966510	1036500	996200	1001500	1072000	1367200	1348200	1412000	1284800	1418600	1333100	953640	768060	969400	882990	1134400	1103200	1133900	1137000	1048300	1243600	1388700	1225500	907820	1546500	1166800	1377400	1384000	1224400
pme2380	145.01	101	146.022	C5H6O5	[M-H]-	A-Ketoglutaric acid	Organic acids	Organic acids	328-50-7	B	1230700	920310	825870	414060	442230	429570	930530	825420	899620	568710	537430	519060	1047400	922010	921700	696610	577850	573180	574860	689140	622330	648310	618440	634850	810990	896660	831710	681490	419920	475840
mws0208	145.05	101	146.058	C6H10O4	[M-H]-	Adipic Acid	Organic acids	Organic acids	124-04-9	B	231910	150940	217510	446220	389140	449700	198260	213040	210040	314110	298590	340210	137400	152260	164220	438850	514270	487870	243260	189580	204640	261580	372960	320480	189110	156220	192260	271530	509510	395310
Wmzn000227	145.06	109.04	146.058	C6H10O4	[M-H]-	2,2-Dimethylsuccinic acid	Phenolic acids	Phenolic acids	-	B	7437.2	14827	14482	13805	9418.1	12985	10823	5187.9	7358.6	19611	14410	13317	9944.2	12495	11035	3949.8	4136.4	5388.8	6304.5	6837.5	7022.9	11558	16613	14957	13904	17330	20375	6999.5	21185	16254
pme0026	147.11	84	146.106	C6H14N2O2	[M+H]+	L-(+)-Lysine	Amino acids and derivatives	Amino acids and derivatives	56-87-1	A	3148700	3620800	3465700	34672000	36564000	35808000	16888000	12967000	14746000	8497600	10577000	9320000	2703100	2310500	2640000	30198000	28489000	30442000	39662000	29454000	35923000	10292000	25655000	17144000	3167100	3931300	3346600	21449000	7037500	11510000
mws1050	148.06	88	147.053	C5H9NO4	[M+H]+	O-Acetylserine	Amino acids and derivatives	Amino acids and derivatives	5147-00-2	B	305810	329710	343210	193790	160270	160170	143230	144880	166980	508970	425890	478390	352170	368920	335170	182240	171670	203660	103720	111290	102530	456100	311430	382040	279060	232790	254170	130500	131650	111210
pme0014	148.06	84	147.053	C5H9NO4	[M+H]+	L-Glutamic acid	Amino acids and derivatives	Amino acids and derivatives	56-86-0	A	34846000	36845000	37766000	27006000	27238000	29203000	24651000	23792000	23492000	22304000	21751000	19943000	31172000	36868000	28632000	28142000	31664000	29453000	28660000	28512000	24381000	24078000	20096000	22226000	33077000	39361000	34073000	25590000	17004000	20886000
pme1210	150.06	61	149.051	C5H11NO2S	[M+H]+	L-Methionine	Amino acids and derivatives	Amino acids and derivatives	63-68-3	A	3248000	3277400	3305100	3146900	2924400	2905900	2784700	2854800	3320500	1777000	1870500	1884100	3239200	3447100	3629100	2909700	2469800	3251000	3071600	2585500	3283700	2350900	3804900	2977700	3644300	3762800	3629100	2888000	6021700	5135300
mws0847	150.08	133	149.07	C6H7N5	[M+H]+	1-Methyladenine	Nucleotides and derivatives	Nucleotides and derivatives	5142-22-3	A	76851	73972	82882	54943	55304	67184	59760	54078	61877	44347	48421	47129	74966	76045	94335	55884	47914	62179	53540	55792	70993	53877	73176	67690	90647	69967	92754	59374	106320	93914
mws1499	149.05	59.01	150.053	C5H10O5	[M-H]-	D-(-)-Arabinose	Others	Saccharides and Alcohols	10323-20-3	B	20386	15704	29206	15439	17268	15816	12408	10411	10692	9651.1	16664	17969	14575	23454	15062	11379	14629	17892	14294	11776	12149	18354	16929	17409	17485	22734	9	14560	12693	7333.3
mws0921	149.06	131	150.068	C9H10O2	[M-H]-	p-Coumaryl alcohol	Phenolic acids	Phenolic acids	3690-05-9	B	36352	31598	36352	24392	29098	24250	34146	18688	24302	27415	30687	24868	33191	36873	38324	26787	26232	30148	20711	15687	20703	30791	21256	24063	69980	31871	53502	23825	31824	32133
pme0183	152.06	135	151.049	C5H5N5O	[M+H]+	2-Hydroxy-6-aminopurine	Nucleotides and derivatives	Nucleotides and derivatives	3373-53-3	B	282370	190450	285370	382180	498430	439380	204350	120030	189470	181540	183000	164510	240230	237540	239110	441540	355720	378690	405340	135750	261140	164170	390400	240160	415530	223010	274170	171600	312410	246060
pme1109	152.06	135	151.049	C5H5N5O	[M+H]+	Guanine	Nucleotides and derivatives	Nucleotides and derivatives	73-40-5	A	2110500	1030500	1664800	1951100	2758600	2291500	1452400	735200	1229700	1464000	1555800	1576600	1939800	1828900	2061500	3267000	2719600	3365300	2656100	743700	1979500	1369400	3739600	2399400	2904000	1403900	2238500	761060	1808200	1388300
pme0256	151.03	151	152.033	C5H4N4O2	[M-H]-	Xanthine	Nucleotides and derivatives	Nucleotides and derivatives	69-89-6	A	15414	10451	13355	27245	29015	20089	32503	41518	37861	27231	41249	31742	20274	10904	13925	22325	27310	23665	21018	26929	35689	24622	49674	30411	20945	26880	15237	32089	104380	57699
mws0458	151.04	136	152.047	C8H8O3	[M-H]-	Vanillin	Phenolic acids	Phenolic acids	121-33-5	A	2710000	2401700	2466600	1297700	1271000	1410200	1463000	2315600	1929300	1289800	1622600	1464500	2330300	2785600	2779400	1260600	2139600	1915000	1140400	1224800	1263200	1422200	1397100	1504600	3849800	2743500	3318200	2162100	2326500	2083600
Lmgp005274	153.05	125.06	152.047	C8H8O3	[M+H]+	4-Hydroxyphenylacetic Acid	Flavonoids	Flavonoid	-	B	19320	15760	15521	9986.3	9933	8769.9	13147	16797	16949	7618.7	10216	13119	15936	20138	14903	11365	14927	13724	11119	9080.1	13373	24795	9584.8	20366	18373	22993	14993	18093	16989	13721
mws0180	153.02	108	154.027	C7H6O4	[M-H]-	2,5-Dihydroxybenzoic acid	Phenolic acids	Phenolic acids	490-79-9	A	148350	141200	180860	25608	27895	28729	28575	42008	40205	47870	61155	63069	221670	297660	322280	71525	96256	100990	44832	129640	60314	172540	304350	218830	269570	119180	190320	31601	80775	69498
mws0183	153.02	109	154.027	C7H6O4	[M-H]-	Protocatechuic acid	Phenolic acids	Phenolic acids	99-50-3	A	572320	553340	672740	77779	92282	95232	115160	139840	150130	185670	223990	196390	2041100	2804200	2614500	251620	1452300	968120	156880	1903600	986450	2154100	3661500	2773500	1031100	488150	828340	142010	328000	241420
pmb3099	153.03	125	154.039	C4H11O4P	[M-H]-	Diethyl phosphate	Organic acids	Organic acids	598-02-7	B	167920	137260	107600	107690	127530	142620	87098	156620	136160	160490	179910	93802	143390	157530	85651	115590	160960	119700	145210	93481	107160	127280	108080	138140	120170	105430	125740	124860	101120	104030
mws0254	156.08	110	155.069	C6H9N3O2	[M+H]+	L-Histidine	Amino acids and derivatives	Amino acids and derivatives	71-00-1	A	501600	668780	589150	10109000	8017400	9265100	4086800	1972100	2639600	3911100	4599800	4004300	533950	470170	475710	7327200	6159900	6329900	8962900	6499800	7306200	3620200	7437200	5459100	1196200	1644500	1375700	6166900	3337000	3971100
mws0987	161.06	115	160.052	C10H8O2	[M+H]+	6-MethylCoumarin	Lignans and Coumarins	Coumarins	92-48-8	B	25933	34995	33601	17284	35288	22378	43365	38019	36958	35987	37172	46719	28274	26009	38671	29930	30115	24974	31263	36811	28168	34954	30716	40719	31020	33418	34241	35607	34321	33551
mws0005	161.11	144	160.1	C10H12N2	[M+H]+	Tryptamine	Alkaloids	Plumerane	61-54-1	A	1850500	1444300	1755900	6430700	8590200	8172400	3760400	2147600	3052400	4498300	5079600	5284800	1433900	1990200	1936700	2273000	3298400	3146000	5375100	3039300	4262300	3294000	5338600	4009500	1254800	2002000	1577000	6642400	14496000	10456000
mws1417	160.04	116	161.048	C9H7NO2	[M-H]-	Indole-3-carboxylic acid	Alkaloids	Plumerane	771-50-6	B	130750	116690	142240	219960	199930	197850	120450	145550	146590	122930	139900	134520	168510	145050	172500	126020	180870	172960	143130	113970	123360	135290	218700	163530	326390	233930	308880	215910	604750	412120
mws1550	162.06	73.1	161.051	C6H11NO2S	[M+H]+	S-Allyl-L-cysteine	Amino acids and derivatives	Amino acids and derivatives	21593-77-1	B	11830	13553	10678	15342	11861	18550	11171	12226	13252	10531	14060	12239	15348	13883	16271	13534	20177	21815	13639	15713	14552	10368	21731	13089	8310.5	24092	14160	14144	12876	12371
pme3382	160.06	98	161.069	C6H11NO4	[M-H]-	N-Acetylthreonine	Amino acids and derivatives	Amino acids and derivatives	17093-74-2	B	114750	112930	91854	84830	83339	87573	81188	96164	88921	75810	78829	81047	95945	117240	128400	81279	69141	85235	64829	71633	84889	81479	100790	86276	126520	154940	119520	124350	120540	101760
mws1346	162.08	98	161.069	C6H11NO4	[M+H]+	DL-2-Aminoadipic acid	Alkaloids	Alkaloids	542-32-5	B	264780	369370	357410	823340	639700	802770	1006600	371070	672480	410100	454900	377940	279070	239740	287510	378880	356860	384500	440450	432530	395160	380090	456170	392030	705980	432600	623870	789590	1247900	1005400
pmf0440	163.08	91.1	162.068	C10H10O2	[M+H]+	4-MethoxycinnaMaldehyde	Phenolic acids	Phenolic acids	1963-36-6	B	119200	95071	87309	95391	104180	126710	70384	124550	101510	105850	127100	87132	120610	109170	108600	88327	120360	117550	81884	89411	87679	104740	90253	99898	99691	98203	100830	111610	67692	78770
mws1478	163.12	130	162.116	C10H14N2	[M+H]+	Nicotine	Alkaloids	Alkaloids	54-11-5	A	239770	177000	215870	1330000	1399800	1716500	1175800	1783800	1878500	1876000	2059200	2086400	176190	807480	226930	2805800	1454100	1927900	1025800	1034900	1093600	1151500	1173900	994210	148720	178760	168920	1478600	1499900	1658700
pme1419	164.07	104	163.067	C6H13NO2S	[M+H]+	Methionine methyl ester	Amino acids and derivatives	Amino acids and derivatives	10332-17-9	B	87962	117170	93948	82481	83703	87555	65890	48553	52575	70237	61354	69869	104440	108180	116310	78728	62039	81688	83390	77567	82992	66153	83842	71682	116110	111190	119470	63128	61876	56793
pmb0142	165.1	95.2	164.047	C9H8O3	[M+H]+	Caffeic aldehyde	Phenolic acids	Phenolic acids	141632-15-7	B	629240	589780	631860	369950	292040	350200	341910	530920	444640	265810	286320	298140	605870	678960	740580	414810	648360	638330	328340	366140	331440	467840	385730	437150	728510	610440	643040	495000	623660	563530
mws0159	163.04	91	164.047	C9H8O3	[M-H]-	Phenylpyruvic acid	Organic acids	Organic acids	156-06-9	B	306280	286310	352090	153270	127090	147590	230830	254990	245840	199740	226680	207220	226100	226040	251610	195590	114360	187770	121870	138470	130220	145090	185440	166780	308290	269250	336990	206090	134010	192520
Lmmn001643	163.04	119.05	164.047	C9H8O3	[M-H]-	2-Hydroxycinnamic acid	Organic acids	Organic acids	583-17-5	B	75691	51746	50237	287740	143150	192500	51184	98586	81947	94638	64981	85582	62271	67772	51389	32124	37985	39888	38119	42396	39480	59507	211840	125460	332190	170760	249040	209880	302950	293820
pme2529	163.2	101	164.069	C6H12O5	[M-H]-	1,5-Anhydro-D-glucitol	Others	Saccharides and Alcohols	154-58-5	B	54613	79029	103140	23165	25116	38938	23490	13949	23880	18050	20073	28650	66156	124200	124280	61966	44738	68303	28635	23355	36825	35263	29729	52067	100530	112610	158070	47035	20715	27671
Hmlp002407	166.05	120.04	165.042	C8H7NO3	[M+H]+	HBOA	Alkaloids	Alkaloids	23520-34-5	B	61055	87284	69656	48690	35759	24232	308880	23174	162170	20974	27520	37038	132300	108250	73678	57171	85614	99147	132210	77806	74182	64821	115400	95040	103200	55566	56761	90684	44180	51633
pme3083	164.04	120	165.043	C8H7NO3	[M-H]-	2-(Formylamino)benzoic acid	Phenolic acids	Phenolic acids	3342-77-6	B	233410	240330	279960	435430	252860	334770	186250	244910	240540	218420	264560	260710	235890	182710	230000	187050	214680	183700	143260	138200	143370	193570	313770	229960	608390	366780	509080	500780	560670	513710
mws1368	166.05	95	165.043	C8H7NO3	[M+H]+	Coixol	Alkaloids	Alkaloids	532-91-2	A	2091800	1920500	2327000	851390	1105100	875560	2051200	321630	1178700	326350	532590	405560	7235900	9763200	9552700	3580300	3506400	3633700	2793500	3405900	2757700	1375100	3188600	2391200	6727100	3971800	5683400	1307800	1457000	1304500
pme2617	166.05	102	165.046	C5H11NO3S	[M+H]+	Methionine sulfoxide	Amino acids and derivatives	Amino acids and derivatives	62697-73-8	B	5160600	4708300	5456200	7690200	6931600	7328500	6665900	10110000	8714700	8149400	9154000	9161800	7474800	4846300	6136000	6101300	6412700	6355400	6777300	6481200	7757100	7747100	7898500	7768900	6764900	6976000	6519400	8399300	13924000	10359000
pme3968	166.07	149.05	165.065	C6H7N5O	[M+H]+	7-Methylguanine	Nucleotides and derivatives	Nucleotides and derivatives	578-76-7	B	38347	18439	77648	56528	44226	48724	33466	28149	21832	42402	62504	62067	62409	49889	72537	33569	29106	34154	27759	24790	29904	29455	52230	38933	89471	73718	76819	24819	68827	49150
pme0021	166.09	120.08	165.07	C9H11NO2	[M+H]+	L-Phenylalanine	Amino acids and derivatives	Amino acids and derivatives	63-91-2	A	336390	415980	387930	1555500	1435400	1533100	893400	941790	949940	507510	649130	588500	331060	276460	305360	877130	905360	941040	1446100	1247100	1364100	379540	756480	534280	634380	470780	520420	1056300	1802900	1441200
pme0281	165.02	121	166.027	C8H6O4	[M-H]-	Terephthalic acid	Phenolic acids	Phenolic acids	100-21-0	B	1065900	1139800	1162400	2853200	2368100	2702300	2470300	2420900	2281300	2655100	2802000	3057300	1036300	1048600	1052200	1638100	2019300	1923200	2164000	1758500	1941400	1583400	1732100	1954200	968510	1136400	1078600	3335900	3760900	3755800
pme0282	165.02	77	166.027	C8H6O4	[M-H]-	Phthalic acid	Organic acids	Organic acids	88-99-3	A	19917	24711	26807	132050	114620	127810	121090	136890	126100	146170	123810	154950	15468	21209	12242	74890	89277	83309	103810	96989	98393	79673	79642	87866	21111	25119	19607	205860	187930	193130
mws0344	165.04	75	166.048	C5H10O6	[M-H]-	D-Xylonic acid	Organic acids	Organic acids	526-91-0	A	294410	390140	387530	371190	308760	296890	356700	317430	269430	324610	310260	359400	314040	300710	329550	366480	387820	292620	308240	318010	317240	335610	455390	324630	261310	405890	381570	460600	193860	204870
pme1266	167.06	124	166.049	C6H6N4O2	[M+H]+	3-Methylxanthine	Nucleotides and derivatives	Nucleotides and derivatives	1076-22-8	B	11689	12321	12886	11940	10901	12241	12158	10419	9287	12517	11262	12524	13604	13359	12458	14764	19300	17252	16116	14432	20181	16598	13854	13745	13236	7930.8	7892.9	12466	11015	12529
mws0467	165.06	119	166.063	C9H10O3	[M-H]-	3-(4-Hydroxyphenyl)-propionic acid	Phenolic acids	Phenolic acids	501-97-3	B	208030	267630	272090	224100	244860	219790	226990	129300	188030	315010	182140	270880	25754	30739	39636	56194	45859	50131	34690	36789	27850	23280	37290	36296	149050	169670	172550	134150	55385	111310
pmn001681	165.09	149.06	166.099	C10H14O2	[M-H]-	1-(4-Methoxyphenyl)-1-propanol	Phenolic acids	Phenolic acids	5349-60-0	B	25722	22650	28664	16817	15484	14927	14294	17938	19683	18532	23442	18729	23157	24869	23641	22944	21683	19877	15054	14374	15130	45170	9701.6	29270	29513	25071	24171	28253	20295	18620
pmc0274	167.1	121.1	166.1	C6H6N4S	[M+H]+	6-Methylmercaptopurine	Nucleotides and derivatives	Nucleotides and derivatives	50-66-8	B	1572200	1947100	1778900	9618600	8722100	9269100	4758500	5146500	5069300	2455500	3337100	2828100	1480600	1253800	1453600	4787500	5017400	5053400	8128000	6757100	7895300	1789200	3923500	2587900	3166400	2407100	2599400	6072100	10932000	8665700
mws0028	167.03	108	168.042	C8H8O4	[M-H]-	Vanillic acid	Phenolic acids	Phenolic acids	121-34-6	B	52956	64192	63478	86878	92941	106930	73360	55334	69402	47460	43356	54200	61483	68117	85097	73057	75738	85711	84941	48521	86003	36027	116910	67912	113600	101130	103790	67853	103390	111150
pme2598	167.03	123	168.042	C8H8O4	[M-H]-	3,4-Dihydroxybenzeneacetic acid	Phenolic acids	Phenolic acids	102-32-9	B	175180	223150	235270	314230	319280	330900	473710	275990	368850	334110	363660	401830	158620	197440	224550	277830	285590	278770	267730	255320	248750	344310	339420	300110	711150	682090	654880	395330	1672000	1058500
Hmbp001276	169.05	65.03	168.042	C8H8O4	[M+H]+	Gallacetophenone	Others	Others	528-21-2	A	1150700	1162600	1225600	541450	462650	542150	251640	251080	222820	406280	291810	384770	879750	1065600	1110200	755090	669730	720530	385220	419570	451410	432090	327550	371990	899330	1032400	875920	331060	149480	226920
pme1383	170.08	134.1	169.074	C8H11NO3	[M+H]+	Pyridoxine	Others	Vitamin	65-23-6	B	883420	860490	896050	2549300	3076700	2922800	2276400	1507400	2030700	1564100	1357500	1541600	848270	1011600	1052000	1802800	1658200	2011300	2024200	1548300	1867800	397070	2522300	1347300	1462700	1605700	1605300	1605700	1942900	1766300
pme3186	169	79	169.998	C3H7O6P	[M-H]-	DL-Glyceraldehyde 3-phosphate	Organic acids	Organic acids	591-59-3	B	37808	29395	27801	11966	9913.9	11806	9661.1	8469.3	8231.4	23277	23785	14287	20312	30441	29354	10894	13239	15073	8745.1	13887	11725	16096	7751.6	15699	24752	20211	28733	14556	4971.2	6400
pme0124	173.09	115.5	172.085	C7H12N2O3	[M+H]+	Glycyl-L-proline	Amino acids and derivatives	Amino acids and derivatives	704-15-4	B	44564	54950	82344	69876	58449	72545	35731	41315	35707	39905	45616	40186	48591	56793	56223	38766	42998	41641	40661	35123	39110	46906	51729	44499	87936	61829	56668	48729	110940	74693
pme0253	174.11	86	173.105	C8H15NO3	[M+H]+	N-Acetyl-L-leucine	Amino acids and derivatives	Amino acids and derivatives	1188-21-2	B	130850	141140	119440	304410	186240	250730	141380	148120	134140	104760	117970	112490	130690	137660	134790	114400	140040	144000	191250	137640	178680	137040	230780	161000	565560	274440	415500	370800	755670	569970
pme2550	173.02	137	174.016	C6H6O6	[M-H]-	Cis-Aconitic acid	Organic acids	Organic acids	585-84-2	B	184240	198850	199230	40816	58597	44857	61958	65090	71750	140900	135680	139340	219270	257180	210460	123530	95977	99798	43648	46714	48016	105790	83092	113520	328450	272650	327310	58212	77244	58131
mws0154	173.05	93	174.053	C7H10O5	[M-H]-	Shikimic acid	Organic acids	Organic acids	138-59-0	B	508090	530770	653790	117250	154540	135830	230620	193140	190940	392120	354780	397640	583090	716460	648550	335550	267790	311220	99918	123090	104030	293250	246260	308480	898920	842190	835280	161220	230600	162340
mws0242	173.08	111	174.089	C8H14O4	[M-H]-	SubericAcid	Organic acids	Organic acids	505-48-6	B	41618	34586	35794	46228	48092	43533	31224	56791	41604	46436	49544	40744	38140	30783	35291	42487	46598	35552	29297	20263	34979	30187	33002	41105	79017	77175	82729	37744	103120	74395
mws0260	175.12	116	174.112	C6H14N4O2	[M+H]+	L-(+)-Arginine	Amino acids and derivatives	Amino acids and derivatives	74-79-3	A	113500	101000	184660	937790	959350	989940	424370	461190	508420	332390	640270	575160	131560	97737	142160	1039100	968380	937840	1118900	780880	865540	346050	532620	493330	125330	142700	114980	625900	301790	692070
mws0620	175.12	144	174.116	C11H14N2	[M+H]+	N-Methyltryptamine	Alkaloids	Alkaloids	61-49-4	A	387870	168520	327960	131760	255860	174580	6309700	121920	3200400	1783000	72080	938420	533530	401570	491810	193410	330610	323030	475610	117850	276040	229750	171390	178390	2051000	645810	1326200	3641600	2297300	2847900
mws1105	175.12	130	174.116	C11H14N2	[M+H]+	Gramine	Alkaloids	Alkaloids	87-52-5	B	33980	31989	33497	408470	379080	464580	213550	227700	189210	293670	334750	308190	25202	25954	35400	294400	205810	243600	374410	269840	352910	148360	258200	229030	60954	65592	60922	259820	343430	372480
pme0008	176.1	113	175.096	C6H13N3O3	[M+H]+	L-Citrulline	Amino acids and derivatives	Amino acids and derivatives	372-75-8	B	39349	48621	57260	53997	47193	62805	26067	22265	30540	31548	27098	26726	38999	58747	55733	37724	41388	48901	34403	32845	39534	28024	45651	34761	54339	40629	27637	34003	31464	26685
mws4175	175.02	85.03	176.032	C6H8O6	[M-H]-	D-Glucurono-6,3-lactone	Others	Others	32449-92-6	B	369430	301370	361320	71787	80869	67428	68599	115330	75889	80575	72657	43712	351370	287200	280120	151140	82826	118860	87367	96170	64163	71684	47561	39802	233300	232580	216750	38461	9	9
Hmfn00531	175.02	87.01	176.032	C6H8O6	[M-H]-	L-Ascorbic acid	Others	Vitamin	50-81-7	B	12627000	11432000	12019000	2675000	3466800	2911800	2837000	4289400	3191400	2933000	2751800	1551800	11974000	10276000	9082500	4812300	4284600	4700600	3161100	3606900	2389300	2879100	2224900	1578800	7700000	7762400	7207700	1864600	224450	617670
mws1075	177.05	121	176.047	C10H8O3	[M+H]+	7-Methoxycoumarin	Lignans and Coumarins	Coumarins	531-59-9	B	3822	4970.2	5634.7	34174	40136	48643	42912	52254	47416	38119	72897	78049	2722.6	9	9	30774	15082	25223	52370	32350	54455	33917	58253	38455	23538	15350	22145	32019	37956	37291
pme2024	177.1	160	176.095	C10H12N2O	[M+H]+	Serotonin	Alkaloids	Plumerane	50-67-9	A	7103300	7465300	8602900	5661400	5686000	5910500	3918600	5201500	4820000	6422000	5433900	5875500	5586500	4153700	5363800	3968700	4238700	4703900	3243100	3131600	2938300	3399100	3574000	2916500	5926500	7200200	6361300	4434300	2240800	2526100
pmb3101	175.1	115	176.1	C7H12O5	[M-H]-	2-Isopropylmalate	Organic acids	Organic acids	-	B	478510	647360	725260	293740	213660	284930	65040	54810	73733	539060	455430	522350	908210	1074600	1059200	178740	191460	219940	102650	101110	104410	325710	783210	497190	1312400	1374500	1323300	331300	1163600	806290
pmb0468	178	161	177	C6H11NO3S	[M+H]+	N-formylmethionine	Amino acids and derivatives	Amino acids and derivatives	4289-98-9	B	254380	257670	315130	203470	189600	217590	121800	172210	168190	235350	202640	158030	197340	145740	194540	139970	153300	170960	112590	117880	107580	84685	130250	109550	222260	268100	253270	159390	72138	90917
pmf0284	177.06	162	178.063	C10H10O3	[M-H]-	Riboprine	Phenolic acids	Phenolic acids	7724-76-7	B	594650	411250	542780	223080	213730	224560	298060	298830	326310	256030	295470	278820	501110	558780	567510	275340	366120	330800	252560	264180	266400	455130	240030	342260	638620	345050	534720	332250	270030	309060
mws1200	177.06	145	178.063	C10H10O3	[M-H]-	Trans-4-Hydroxycinnamic Acid Methyl Ester	Phenolic acids	Phenolic acids	19367-38-5	B	9498.3	11966	10814	22249	32631	31503	20931	24277	28528	38457	47556	54956	28962	21191	24746	26279	13830	22747	35567	21391	34945	34036	47723	45854	28576	18871	22737	18229	13864	19128
pmb0786	180	162	179	C6H13NO5	[M+H]+	Glucosamine	Others	Saccharides and Alcohols	3416-24-8	B	238360	219490	266460	331280	353160	397140	317710	492990	454180	388600	434060	412790	375120	228550	264090	311490	309800	311790	312940	324970	332300	381890	346250	356810	422490	331600	336970	389370	706800	559770
mws2212	179.03	135.05	180.042	C9H8O4	[M-H]-	Caffeic acid	Phenolic acids	Phenolic acids	331-39-5	A	116850	96563	116760	91253	96648	86088	82868	48301	75382	74880	101010	95907	1735200	2277000	2158400	141340	981660	639070	66269	1426800	684620	1425800	2131100	1771300	120560	95851	131130	87368	76959	75305
pme0516	179.06	87	180.063	C6H12O6	[M-H]-	Inositol	Others	Saccharides and Alcohols	87-89-8	B	89669	105730	107450	99114	83800	102920	100150	87147	91143	72577	85402	82281	101610	101220	104390	90331	105890	95482	86352	77253	94148	89733	110090	98968	117120	125790	105770	96140	72186	72436
mws4170	179.06	59.01	180.063	C6H12O6	[M-H]-	D-Glucose	Others	Saccharides and Alcohols	14431-43-7	B	497880	776850	573080	510210	438760	473520	326390	292650	297680	247570	221820	232490	417970	557880	521480	416350	247560	325540	435890	268820	295300	161140	239150	164180	903640	945250	780160	170270	88717	79834
mws0093	179.07	146	180.079	C10H12O3	[M-H]-	Coniferyl alcohol	Phenolic acids	Phenolic acids	458-35-5	B	128540	71515	125280	55436	47129	47114	64091	31342	50237	45535	70498	60870	110980	115630	122950	56838	54103	58574	49571	38540	53608	79392	58789	76175	217170	93928	146150	65546	115560	81248
mws0250	182.08	136.1	181.074	C9H11NO3	[M+H]+	L-(-)-Tyrosine	Amino acids and derivatives	Amino acids and derivatives	60-18-4	A	1013600	1170400	992440	2963400	2585300	2984100	1794900	1860100	2057100	1134200	1845600	1562500	1180400	943320	1135000	1872200	2066700	2494500	2547800	2080100	3033300	1210300	1955900	1497200	1646100	1181600	1525300	2104700	2600700	2613700
mws1350	181.05	151	182.058	C9H10O4	[M-H]-	Syringic Aldehyde	Phenolic acids	Phenolic acids	134-96-3	B	68700	55110	68130	45532	46682	48181	54242	75216	81918	46572	66570	67230	55696	45710	61189	47211	47296	41657	53778	31691	47599	49750	57367	56665	111990	103530	100320	61217	86056	79662
mws0117	181.05	122	182.058	C9H10O4	[M-H]-	Homovanillic acid	Phenolic acids	Phenolic acids	306-08-1	B	20428	19670	8872.1	64153	64108	69700	48592	31995	54118	31410	28577	30767	8689	5650.9	9747.2	26363	34172	20484	20008	14348	22122	7128.7	37455	21287	20096	23127	21741	30881	27852	25329
mws0214	181.07	71	182.079	C6H14O6	[M-H]-	D-Sorbitol	Others	Saccharides and Alcohols	50-70-4	B	12156	11701	14013	9482.7	9337.2	11432	31260	16852	20888	11787	11856	15251	12635	7375.8	12554	7127.3	10080	8471.2	7612.6	8675.7	5563.3	10279	13475	9900.9	18326	13216	17302	10675	13844	11579
pme2596	184.06	148	183.053	C8H9NO4	[M+H]+	4-Pyridoxic acid	Others	Vitamin	82-82-6	B	101570	115340	117060	368340	432110	416410	402570	199850	320840	270240	227380	261480	132340	117530	130210	336850	372190	389620	465630	385000	451650	268460	505490	389600	88310	154210	124180	381950	230030	284760
mws0752	185.15	185.16	186.162	C11H22O2	[M-H]-	Undecylic Acid	Lipids	Free fatty acids	112-37-8	B	568530	469950	565090	851950	724300	873690	635130	653690	704650	788180	697270	833160	385930	423600	430740	605930	710710	749720	652590	459990	646800	609630	688810	674270	524760	568590	538870	897520	787520	799960
mws0237	187.1	125	188.105	C9H16O4	[M-H]-	Anchoic Acid	Organic acids	Organic acids	123-99-9	A	1724100	1567100	1811700	1776800	1295600	1620300	1436300	2513700	1967900	1635800	1799000	1718700	1366600	1588900	1544900	1488000	1643900	1409400	1243100	1154600	1253900	1259100	1419100	1272900	6764900	4982900	6139700	1618500	5833800	3920700
pme0122	189.12	126	188.116	C8H16N2O3	[M+H]+	N6-Acetyl-L-lysine	Amino acids and derivatives	Amino acids and derivatives	692-04-6	A	48041	27110	33077	141580	165330	174630	67276	81845	138720	37256	53098	69059	31041	30245	55382	88906	92130	210630	103090	105490	178800	48518	87021	63034	38523	33921	35221	88661	51295	84025
mws0736	189.12	86	188.116	C8H16N2O3	[M+H]+	N-Glycyl-L-leucine	Amino acids and derivatives	Amino acids and derivatives	869-19-2	B	619910	676450	678280	1874300	3414000	2736300	902620	725450	854780	859340	492770	644050	782700	674890	748560	2972800	2320000	2813000	2177900	426080	1392200	542630	2540600	1423900	974620	809320	850720	513440	1308000	924940
mws5041	189.12	86.1	188.116	C8H16N2O3	[M+H]+	Glycylisoleucine	Amino acids and derivatives	Amino acids and derivatives	19461-38-2	B	451080	517880	547280	1586300	2925300	2171600	774790	597770	689740	668050	408030	537610	610980	502570	591070	2380200	1784800	2193300	1692000	357540	1089200	414850	2020300	1110600	727280	617220	666670	419050	1064700	678030
pme0075	188.1	128	189.064	C7H11NO5	[M-H]-	N-Acetyl-L-glutamic acid	Amino acids and derivatives	Amino acids and derivatives	1188-37-0	B	333530	348540	365870	71334	65041	78778	97608	110930	109490	205040	164650	191310	415590	415620	412010	87043	122940	106200	74113	84870	85756	238370	212840	201880	344730	312450	368200	103500	142220	131580
pme2244	190.09	118.07	189.07	C11H11NO2	[M+H]+	3-Indolepropionic acid	Alkaloids	Plumerane	830-96-6	B	4515.2	7075.1	5433.6	73501	42847	76296	17757	20220	19463	31094	47190	48781	6707.2	7643.4	5613.6	34177	22274	31237	56979	31739	45189	22337	61387	18060	12777	12193	14041	29787	65009	64209
mws0193	190.12	127	189.111	C7H15N3O3	[M+H]+	L-Homocitrulline	Amino acids and derivatives	Amino acids and derivatives	1190-49-4	B	21492	10839	16628	49892	50044	53372	35078	34263	35710	18865	23441	23933	12327	11534	14059	48051	42521	38040	41676	45538	34259	24951	27411	19406	14475	17541	20353	53095	24013	25029
pme0278	191.1	128	190.095	C7H14N2O4	[M+H]+	2,6-Diaminooimelic acid	Amino acids and derivatives	Amino acids and derivatives	583-93-7	B	25722	21552	27731	44304	35175	45863	17808	14377	18938	28960	36431	34611	37138	26419	36300	26864	32498	30061	21803	18764	25489	24318	30170	27632	38896	63798	67418	40269	52485	50727
mws1611	191.11	173.4	190.099	C12H14O2	[M+H]+	Ligustilide	Others	Others	4431-01-0	A	119800	113020	108470	57259	54941	58428	73398	72620	77488	68314	76804	76392	85197	106380	106520	82406	84238	97263	68845	65402	61582	155430	39938	98022	124790	80378	105050	95152	84104	76889
mws0281	191.02	111.01	192.027	C6H8O7	[M-H]-	Citric Acid	Organic acids	Organic acids	77-92-9	A	1896300	1703500	2181000	2348400	2525900	2889000	1569600	1771200	1950500	3177400	3349300	3317000	2685100	3582700	3018300	3373200	2338800	2866300	2809100	2558700	3230800	2858300	3506000	4092600	5251400	4191200	4714200	3246500	4426400	3284200
Hmcp002123	193.05	178.02	192.042	C10H8O4	[M+H]+	6-Hydroxy-7-methoxycoumarin	Lignans and Coumarins	Coumarins	776-86-3	B	15215	12544	18473	14890	13862	17830	12457	16684	10110	8079.9	11443	9008.7	18710	11856	16245	17722	15029	17526	15705	17321	13469	9758.7	19637	10355	30166	19772	22781	19451	28762	22021
mws0277	191.06	85	192.063	C7H12O6	[M-H]-	Quinic Acid	Organic acids	Organic acids	77-95-2	B	1385800	1198700	1580800	2399100	2008000	2326600	1663900	1807300	1959600	2326300	2683200	2609400	2144700	2286500	2254100	2525500	1963600	2453400	2335600	2179500	2690800	2916000	2781000	2843200	4174800	2662800	3271400	2780500	4481400	3298100
pme2743	194.08	91	193.074	C10H11NO3	[M+H]+	N-Phenylacetylglycine	Amino acids and derivatives	Amino acids and derivatives	500-98-1	B	161730	160780	173970	44940	52230	53718	241480	51355	193230	77478	59174	78070	262080	234460	373940	166390	158060	162120	158000	96666	209610	139790	106620	131040	247980	168310	203750	156480	60666	112880
pme3705	193.04	73	194.043	C6H10O7	[M-H]-	D-Glucoronic acid	Others	Saccharides and Alcohols	6556-12-3	B	7203.6	14099	9966.8	15135	15079	17571	12833	12441	13910	20951	10603	18110	14493	11029	12450	15718	10793	13997	11951	7601.5	8453.6	16821	18364	16994	24816	20948	24771	20603	33127	20820
mws0014	193.05	134.01	194.058	C10H10O4	[M-H]-	Ferulic acid	Phenolic acids	Phenolic acids	537-98-4	B	708460	508730	702570	673710	1026500	779850	402240	317880	400680	412580	426510	495610	851810	1018800	1097700	615440	446460	565780	482210	362170	435450	502150	851380	679150	1552300	978430	1337200	718550	1321000	1044200
pme0534	195.05	74.9	196.058	C6H12O7	[M-H]-	Gluconic acid	Others	Saccharides and Alcohols	526-95-4	B	446540	452460	469870	691160	626600	672250	550480	483810	551160	673150	572710	711060	542310	501550	589770	761180	822190	828610	854120	823420	878110	906910	882540	868480	690050	644050	687960	760460	911080	764890
mws0027	197.05	123	198.053	C9H10O5	[M-H]-	Syringic acid	Phenolic acids	Phenolic acids	530-57-4	B	640440	743270	735620	1173200	1322600	1396300	875210	507840	685050	540440	501370	517350	501230	557250	581330	980130	1013900	1092100	910480	514140	669760	243640	1170700	606010	643690	855480	757750	586130	384730	463470
pmb2640	199.17	181	200.178	C12H24O2	[M-H]-	Lauric acid	Lipids	Free fatty acids	143-07-7	A	20680	17653	18010	28025	23851	27420	23751	20147	23914	31443	43762	40499	14415	15117	15544	20039	20629	23256	20095	17065	20113	18397	25485	20363	15650	18624	17699	28406	19638	22806
pmb0130	203.12	144	202.111	C12H14N2O	[M+H]+	Acetryptine	Alkaloids	Phenolamine	3551-18-6	B	17360	9087.9	15260	14722	17522	15400	23167	6560	16592	13914	26636	21326	11755	10886	14858	9028.4	17818	15439	15800	9409.4	16333	16189	23641	24212	14558	8848.4	13627	21127	49123	31790
mws0018	203.22	83	202.216	C10H26N4	[M+H]+	Spermine	Alkaloids	Phenolamine	71-44-3	B	16201000	13480000	15355000	18928000	19483000	18729000	22116000	27192000	27213000	24985000	27041000	24120000	20920000	12025000	20135000	19431000	17769000	16211000	18469000	21027000	20848000	20820000	24019000	19966000	20155000	22157000	20311000	22348000	38062000	27014000
mws0282	203.08	116.05	204.09	C11H12N2O2	[M-H]-	L-Tryptophan	Amino acids and derivatives	Amino acids and derivatives	73-22-3	A	2421400	3058400	2542800	39473000	32789000	36818000	15068000	13831000	16150000	20807000	28379000	26125000	2124300	1884800	2128400	24903000	17864000	23526000	33280000	20562000	28751000	10361000	24664000	17994000	7126600	5318100	6212600	22866000	37445000	30516000
pme1261	206.14	76	205.131	C9H19NO4	[M+H]+	Pantothenol	Others	Saccharides and Alcohols	16485-10-2	B	80386	25148	74429	30238	21507	81671	39544	41504	47457	21947	23025	24259	31461	146790	37081	41973	30030	35016	58986	44750	62892	39007	18847	25032	23502	38583	58697	51557	65927	82632
mws2125	166.98	78.7	205.938	C3H4KO6P	[M-K]-	Phosphoenolpyruvic acid	Organic acids	Organic acids	4265-07-0	B	916030	822130	756570	235630	267780	247700	254310	222510	241440	263250	297690	290500	565220	840890	733190	317970	361480	315930	242660	221020	230150	237630	149020	208040	662230	706390	652460	474640	50459	109810
mws1076	207.07	151	206.058	C11H10O4	[M+H]+	Scoparone	Lignans and Coumarins	Coumarins	120-08-1	B	25416	33861	25719	27500	29798	28860	18092	9076.9	16791	167010	25786	98623	10136	8630.4	8285.1	11424	14559	10869	8119	5789.7	8932.6	11170	9073.1	10081	15907	25583	19123	26517	860.58	16167
pmb1587	207.14	165.2	206.131	C13H18O2	[M+H]+	4-Hydroxy-3,5-diisopropylbenzaldehyde	Phenolic acids	Phenolic acids	10537-86-7	B	86047	80206	101920	46033	36621	39183	51695	72463	77455	43566	41083	47576	91778	90796	104670	63749	92039	95219	45970	48493	52078	69101	53797	63775	85122	98684	93275	63032	61388	58767
Lmln010063	205.16	189.13	206.167	C14H22O	[M-H]-	2,6-Di-t-butylphenol	Phenolic acids	Phenolic acids	128-39-2	B	541810	467160	491810	502410	515640	591010	394580	578230	534540	506920	542940	534080	504590	511000	504350	402020	476160	602100	514220	485030	511890	537040	507950	504630	551700	539940	464290	521500	431990	439510
mws1014	209.04	149.1	208.037	C10H8O5	[M+H]+	Fraxetin	Lignans and Coumarins	Coumarins	574-84-5	B	128050	154140	128670	177680	165090	143580	149660	188120	159210	114040	110260	155120	108940	83907	101580	123810	117370	99888	93903	128840	145550	159210	127420	114220	70190	125990	108880	146650	102280	78378
pmb2620	207.07	133.1	208.074	C11H12O4	[M-H]-	3,4-Dimethoxycinnamic acid	Phenolic acids	Phenolic acids	14737-89-4	B	31410	26972	34159	18165	22796	25511	17778	12854	20677	23203	30666	32621	52643	66469	67038	35825	26708	34977	35212	30176	40196	32670	40205	41452	55766	43235	57677	21758	19973	17422
pme3443	207.07	192	208.074	C11H12O4	[M-H]-	Sinapinaldehyde	Phenolic acids	Phenolic acids	4206-58-0	B	207390	165110	195170	101990	97471	111370	167060	170670	166890	133490	156240	152900	158310	172010	180730	127500	133510	141930	113320	107310	117720	183160	92948	147820	229260	149910	201100	135110	81777	114540
mws0853	209.08	179	210.089	C11H14O4	[M-H]-	Sinapyl alcohol	Phenolic acids	Phenolic acids	537-33-7	B	35312	18434	29060	18876	18114	16176	19145	10434	14312	14561	20639	29200	15544	18509	16816	9514.9	5090.3	7918.2	12566	6543	7343	14937	9229.8	8870	48090	18121	38142	19120	34808	32074
pme2710	211.1	167	212.141	C12H20O3	[M-H]-	Dihydrojasmonic acid	Organic acids	Organic acids	-	B	4481.3	11193	9434.2	15784	12627	16789	11320	27778	19485	21155	13095	9947.6	8682.5	8706.4	11063	8227.5	12825	11470	12511	8207.1	15320	10342	15887	10374	18971	9482.8	15447	15732	37566	27287
pme0170	217.13	158	216.122	C8H16N4O3	[M+H]+	N-α-Acetyl-L-arginine	Amino acids and derivatives	Amino acids and derivatives	155-84-0	A	166630	162500	174810	97240	60695	91682	66146	77432	100030	96093	143390	146400	202920	180270	268050	59520	73732	94661	85697	87397	101180	88623	167760	132470	103900	126900	169390	76387	44868	98177
pme2566	217.08	199	218.09	C8H14N2O5	[M-H]-	(5-L-Glutamyl)-L-amino acid	Amino acids and derivatives	Amino acids and derivatives	5875-41-2	B	455990	457350	406400	379080	438920	416020	377000	404310	429600	525430	429140	497980	449270	396310	383560	351960	550200	512060	555170	473190	564480	477620	642560	594370	278450	444670	360690	629070	473790	472610
mws0677	219.11	160	218.106	C12H14N2O2	[M+H]+	N-Acetyl-5-hydroxytryptamine	Alkaloids	Alkaloids	1210-83-9	B	127910	189550	141470	374230	370490	388640	197360	162610	224120	278720	290410	270530	153070	175990	175090	271680	205260	231060	290740	223710	307660	174860	324600	252940	226310	187200	193650	268670	539760	339870
mws1337	220.12	202.1	219.111	C9H17NO5	[M+H]+	D-Pantothenic Acid	Others	Vitamin	79-83-4	A	1270200	1203100	1346000	2417300	2203600	2237800	1463400	1197000	1440000	1482100	1297500	1471900	1443100	1324300	1616200	1903300	1717100	2112300	1920400	1854700	1834600	1477800	1475400	1396300	1368300	1387400	1343600	1803000	1476300	1326900
pme1228	221.09	204	220.085	C11H12N2O3	[M+H]+	5-Hydroxy-L-tryptophan	Amino acids and derivatives	Amino acids and derivatives	56-69-9	B	81528	35814	65670	136950	114740	131490	89563	94621	88457	131200	117800	150900	75866	32198	54520	78266	79127	80406	119840	101760	116000	105380	141420	109280	53145	75575	65920	110090	196750	150130
pme2755	222	144	221.09	C8H15NO6	[M+H]+	N-Acetyl-D-glucosamine	Others	Saccharides and Alcohols	7512-17-6	B	209680	163290	241780	240410	277500	318530	297170	381070	436480	304130	344180	337030	286840	178440	246730	257960	259490	214400	257750	280040	305340	294930	277000	290570	291090	277540	302830	301870	572140	370010
mws5042	223.11	120.09	222.1	C11H14N2O3	[M+H]+	Glycylphenylalanine	Amino acids and derivatives	Amino acids and derivatives	721-66-4	B	204550	227710	195800	972850	1562000	1325100	482530	320770	381910	342310	205080	262870	286200	214930	260020	1416400	1096900	1339800	1110600	166690	737400	179570	1221600	592220	366770	286770	349090	183260	683630	433980
Hmgp005956	223.13	149.02	222.125	C13H18O3	[M+H]+	Dehydrovomifoliol	Terpenoids	Sesquiterpenoids	15764-81-5	B	173800	157090	166730	156740	166840	171650	169710	182030	170660	176520	172700	176510	173670	181180	188800	163530	179620	188160	153160	156320	177180	180170	153970	176450	181870	179420	185300	187850	146890	176940
mws0520	224.09	136	223.084	C11H13NO4	[M+H]+	N-Acetyl-L-tyrosine	Amino acids and derivatives	Amino acids and derivatives	537-55-3	B	53654	47589	60608	73757	40250	55538	33594	44120	39430	30687	30969	23197	56599	51131	61060	21333	37788	35254	35607	36506	24185	36338	54704	32900	134120	98191	115710	65012	127060	81150
mws4085	223.06	193	224.068	C11H12O5	[M-H]-	Sinapic acid	Phenolic acids	Phenolic acids	530-59-6	A	129340	137720	155060	289530	390970	393510	123820	82767	126430	98184	35449	91445	164590	131430	164120	527100	417900	451720	317090	115680	221260	102200	451300	269560	196080	218270	185170	102030	88381	81610
pmb2643	225.19	207	226.193	C14H26O2	[M-H]-	Myristoleic acid	Lipids	Free fatty acids	544-64-9	A	49085	40398	50638	10341	8615.1	10889	4060.6	6277.5	5228.1	5963.6	6407.1	5407.8	22402	25025	24419	11372	14256	12936	3375.1	5037.5	6260.3	5997	4774.7	5304.3	28378	22729	26661	7153.1	9067.6	7714.1
pme1194	228.1	112	227.091	C9H13N3O4	[M+H]+	Deoxycytidine	Nucleotides and derivatives	Nucleotides and derivatives	951-77-9	B	280270	202620	265070	591140	522410	601740	400100	562500	561450	656240	803520	784520	266600	201030	266770	493990	457270	560380	1159800	259820	865510	343080	690130	472980	633490	281040	498410	372250	1414100	1025200
Lmhp001430	227.09	116.07	227.103	C10H14N2O4	[M+H]+	Cyclo(Pro-Glu)	Amino acids and derivatives	Amino acids and derivatives	-	B	176220	168050	130860	177210	173800	171530	138780	163600	148030	155880	131700	173190	134830	66483	133410	138210	147970	150880	117790	103980	148780	106610	165920	137640	143820	219380	180740	180390	272220	257650
pme3882	227.1	184	228.075	C9H12N2O5	[M-H]-	2'-Deoxyuridine	Nucleotides and derivatives	Nucleotides and derivatives	951-78-0	B	4859	2599.4	4063.7	18960	20178	19520	8458.2	10116	8883	16008	9941.6	13205	3537.3	2701.6	2259.3	16927	12979	12737	27548	4762.4	16199	4351.1	25684	16593	8895.3	7235.5	7603.1	8118.4	94555	56732
Lmgp004223	229.09	107.05	228.079	C14H12O3	[M+H]+	trans-resveratrol	Flavonoids	Flavonoid	-	B	14688	15296	15925	50108	57606	46150	47610	38657	43746	51533	25387	47710	25066	18830	14581	41733	28127	38221	53323	52500	45416	36819	60427	47093	38099	40148	30763	57951	145620	88943
mws0119	227.2	227.2	228.209	C14H28O2	[M-H]-	Myristic Acid	Lipids	Free fatty acids	544-63-8	A	3261600	2532900	2985000	2645900	2809400	2967100	3545400	3178500	3796600	5020200	10347000	8486600	1950900	2355300	2155800	1958900	2231000	2161800	1680400	1488300	1521300	3467400	6130700	4685600	2205900	2312500	2377900	2947700	1807700	2366600
Lmhp001461	229.15	70.07	229.154	C11H20N2O3	[M+H]+	Pro-Leu	Amino acids and derivatives	Amino acids and derivatives	-	B	427850	379760	460300	2127500	3156800	2410600	790530	677920	809390	867250	562540	613490	499320	388680	448940	2112600	1744600	2124000	1381000	351240	1024100	392740	1815900	939780	674780	555920	699360	461660	1583100	1029700
mws0474	229.14	211	230.152	C12H22O4	[M-H]-	Dodecanedioic aicd	Organic acids	Organic acids	693-23-2	A	1395.3	1200.1	1675	1834.5	2156.4	2392.7	1923.2	2106.2	2083.3	1767.2	1600.9	1970.6	1669.6	1306.7	1503.8	1814.2	1469.1	2344.2	1657.4	1378	1374.1	1421.3	2107.8	1729.7	2407.8	1721	2371.8	1721.7	3902.4	3382.5
Lmhp001670	231.16	72.08	231.17	C11H22N2O3	[M+H]+	Val-Leu	Amino acids and derivatives	Amino acids and derivatives	-	B	369270	458610	404150	1464100	2547700	2042900	1329800	973790	1056900	862730	514180	780290	973210	716200	996970	1564400	1535100	1768500	2406700	375090	1572100	275760	2177200	1007300	700000	677660	679960	403850	1046300	707030
pmb0490	235.14	147.04	234.137	C13H18N2O2	[M+H]+	p-Coumaroylputrescine	Alkaloids	Phenolamine	34136-53-3	A	1358100	1865800	1646600	1313700	1287900	1398300	879370	478170	680750	1299000	1280000	1490500	3091600	4303800	4221100	10699000	5902800	9111200	2788600	3306800	3071500	2731400	4361900	3178500	5847500	2543800	4096000	1414000	2680700	2080400
pmb0962	235.1	118.3	234.158	C10H22N2O4	[M+H]+	Lysine butyrate	Amino acids and derivatives	Amino acids and derivatives	80407-71-2	B	5393900	6566000	6070600	3940500	3580600	4308200	4664200	2747500	4296200	3582600	3048400	3777200	6700600	5993800	6971300	5163800	4303900	5121300	6055300	5301800	6737700	5572700	8232100	6625000	3903100	7276300	5807400	5035500	2952700	2236400
mws4176	237.12	120.09	236.116	C12H16N2O3	[M+H]+	DL-Alanyl-DL-phenylalanine	Amino acids and derivatives	Amino acids and derivatives	1999-45-7	B	80449	93635	82853	353400	569670	480160	243620	185590	234880	132760	80321	108530	160430	89847	157230	470860	421600	499340	520760	82788	328950	64732	481230	239790	236750	146780	167740	106600	385940	246140
Lmhn003240	237.04	121.03	238.048	C11H10O6	[M-H]-	benzoylmalic acid	Phenolic acids	Phenolic acids	-	A	2638400	2772800	2972600	3384000	3400800	3090800	3239900	3537700	3361000	3242500	3175000	3169500	2678500	2231800	2615200	3082100	2538000	2870000	2275200	2572500	2462900	2363300	2445000	2357400	3312000	2845100	2868200	3376300	3394300	3318600
pmn001320	237.08	163.04	238.084	C12H14O5	[M-H]-	1-O-p-Cumaroylglycerol	Phenolic acids	Phenolic acids	106055-11-2	B	3435.7	9	9	51794	15019	35219	3609.4	12255	10100	15213	10020	20048	3150.1	1711.3	1426.3	6496.3	9	2011.8	6409.8	2939	5150.8	2436.2	37459	18695	57745	20197	33549	65046	41937	51877
pme0264	243.1	127	242.09	C10H14N2O5	[M+H]+	Thymidine	Nucleotides and derivatives	Nucleotides and derivatives	50-89-5	B	320270	239520	303180	997060	981810	1071700	474500	601830	566370	897640	842220	838630	275660	204210	280370	917660	839330	922020	1817200	280650	1261300	489790	1319700	746100	901620	416950	697000	534310	4519500	2732200
mws0359	241.22	241.22	242.225	C15H30O2	[M-H]-	Pentadecanoic Acid	Lipids	Free fatty acids	1002-84-2	A	1960800	1202600	1299600	712180	830250	835520	437750	455830	545640	677600	665030	680870	957490	1030700	1102200	735200	919220	771530	502120	430920	465230	446370	622530	526440	1026500	884450	1016300	570200	809720	677200
pme3732	244.09	112	243.086	C9H13N3O5	[M+H]+	Cytidine	Nucleotides and derivatives	Nucleotides and derivatives	65-46-3	B	1995200	2867400	3313000	2069600	2957100	3050100	1953500	1297400	1620200	1910200	1519600	1550600	2731100	2957300	2898400	2728500	2405900	2353500	3022000	1276700	2139700	1406500	2394100	1612400	3281400	2619400	2370500	1554100	1049000	1109600
mws0248	243.06	110	244.07	C9H12N2O6	[M-H]-	Uridine	Nucleotides and derivatives	Nucleotides and derivatives	58-96-8	B	124670	224700	216620	360580	386330	342050	194170	102240	150690	180860	116510	161070	230750	209950	244110	287580	279610	284560	326880	187460	202950	146790	450250	246310	228020	184160	225470	121310	218560	210890
mws0976	243.06	153	244.07	C9H12N2O6	[M-H]-	β-Pseudouridine	Nucleotides and derivatives	Nucleotides and derivatives	1445-07-4	B	26019	22893	19979	33301	42873	18993	54123	35963	55871	40838	44003	50452	27775	25208	26872	32855	23492	28275	31215	24589	32235	43198	76616	45428	23068	21652	31640	39832	56803	33505
pme2266	245.1	227	244.088	C10H16N2O3S	[M+H]+	Biotin	Others	Vitamin	58-85-5	B	24251	20197	19551	37569	30838	40265	21721	22318	19696	33059	24025	26004	20061	22861	26429	20672	25948	25562	20522	27648	22913	22762	22779	21557	31430	27757	30219	35917	33296	22574
Lmhp002031	245.18	86.1	245.186	C12H24N2O3	[M+H]+	Leu- Leu	Amino acids and derivatives	Amino acids and derivatives	-	B	283540	359130	355110	772670	937830	946540	720800	466000	525270	495090	475480	528280	505870	447510	483680	460380	427270	567970	572470	281930	475950	270420	711660	464480	351400	331300	372610	351260	519370	442290
pmb2591	245.09	203.2	246.1	C13H14N2O3	[M-H]-	Acetyltryptophan	Amino acids and derivatives	Amino acids and derivatives	2280-01-5	A	937970	1232900	1137900	1390100	1515400	1333000	2425400	1547200	2365700	1851000	1968500	1997300	336130	309660	457080	543470	645910	612280	647020	527800	620230	690890	746290	699990	1968800	1870900	1774600	2314600	1670500	2499400
mws0124	247.11	130	246.1	C13H14N2O3	[M+H]+	N-(3-Indolylacetyl)-L-alanine	Amino acids and derivatives	Amino acids and derivatives	57105-39-2	B	12512	12277	9164.4	15245	8542.7	8585.3	18203	4257.9	9935.4	9447.7	16729	17108	6061.2	3838	3299.4	3026.9	1858.2	5766.9	4507.7	3552.6	3948.6	7615.8	5855.2	8199.9	29469	11882	24095	16928	47873	25266
pme2563	249.06	128	250.062	C8H14N2O5S	[M-H]-	γ-Glu-Cys	Amino acids and derivatives	Amino acids and derivatives	636-58-8	B	30300	20729	24670	39275	36666	33317	21165	12416	22884	20658	16394	15503	24194	28027	28821	14136	9381.2	12608	19922	18725	18004	31413	42530	35362	28216	29899	25002	26201	29918	19939
Lmhp002153	251.14	147.04	250.132	C13H18N2O3	[M+H]+	N-p-Coumaroylhydroxyputrescine	Alkaloids	Phenolamine	-	B	9157600	8007600	8604100	25868000	47852000	39890000	24121000	16930000	20688000	20750000	14269000	17170000	13981000	14805000	16131000	9001900	19767000	17147000	15248000	11531000	13176000	13559000	20507000	16522000	25578000	15993000	19331000	14713000	35603000	23903000
pme3961	252.11	136	251.102	C10H13N5O3	[M+H]+	Deoxyadenosine	Nucleotides and derivatives	Nucleotides and derivatives	958-09-8	A	2265400	1641800	2001800	3497700	2670900	3252500	2747900	2612000	2913100	3553200	4015700	3875500	1457600	1404800	1465600	2049700	1518400	2030900	2562800	1954100	2332300	3249500	3040700	3207600	2818500	1359600	2084500	2654300	6236700	4440700
Lmhn003373	253.04	137.02	254.043	C11H10O7	[M-H]-	p-Hydroxybenzoylmalic acid	Phenolic acids	Phenolic acids	-	B	11585	5422.2	10321	61842	33280	52523	44974	72147	65333	64243	70408	66564	12071	8139.2	9723.1	24336	20327	23850	51027	31654	40693	25408	39831	35675	50077	44335	54025	54723	246980	151260
mws0361	253.22	235.19	254.225	C16H30O2	[M-H]-	Palmitoleic Acid	Lipids	Free fatty acids	373-49-9	B	28661	24211	23470	11193	9621.2	7147.8	8517.8	10584	12826	6265.4	6953	5425.7	15908	18515	18638	11387	11783	10390	8704.1	9283.7	7709	4490.1	6001.1	5097.6	18824	17337	17741	12536	15123	15554
pma3101	256.2	124.1	256.082	C11H14NO6+	[M+H]+	Nicotinate D-ribonucleoside	Others	Vitamin	17720-18-2	B	1301200	1659800	1581900	2413100	2827700	2889200	2154000	1597000	1815400	2166700	2272100	1928500	1734900	1682900	1998400	2048600	1743200	2088100	1912300	1536100	1934100	1773800	2485900	1961300	1683000	1546200	1576300	1728900	1545700	1376300
pmn001578	255.23	255.23	256.24	C16H32O2	[M-H]-	Palmitic acid	Lipids	Free fatty acids	57-10-3	A	55176000	51875000	45401000	49970000	67558000	64282000	50869000	45336000	64988000	56900000	58477000	56587000	59881000	60478000	62446000	64517000	58169000	56328000	68559000	56723000	60509000	41258000	61712000	50179000	50507000	54719000	62137000	54054000	55588000	53402000
mws0120	258.11	104.11	257.103	C8H20NO6P	[M+H]+	Choline alfoscerate	Lipids	PC	28319-77-9	B	3644800	4055800	4052900	1489200	1379300	1461900	1776000	1762200	1613200	1918900	1839600	1652900	3406200	4196000	3187700	1476100	1476300	1196100	1254600	1457600	1327400	1440800	1086300	1333300	3203800	3139300	3203000	1348600	1445500	1237400
mws1090	259.02	97	260.03	C6H13O9P	[M-H]-	Glucose-1-phosphate	Others	Saccharides and Alcohols	59-56-3	A	1575900	1586500	1804700	1014500	967350	1044300	1173500	1044200	1094200	1247600	1287200	1354500	1357800	1561300	1753900	826660	1002700	1013300	901150	840760	894240	1134500	873690	992820	1628700	1535200	1765400	1267800	780050	1025000
Lmhp001732	263.13	70.07	263.139	C14H18N2O3	[M+H]+	Pro-Phe	Amino acids and derivatives	Amino acids and derivatives	-	B	42964	49305	67519	280120	217870	264820	70971	106330	92976	83121	105990	96751	70566	43384	68851	145470	142170	150350	124330	55637	117910	50287	670330	303120	679360	714000	708540	300590	2346100	1313000
mws0715	263.1	145	264.111	C13H16N2O4	[M-H]-	Phenylacetyl-L-glutamine	Amino acids and derivatives	Amino acids and derivatives	28047-15-6	B	122990	52397	103030	275710	221170	260860	159910	364400	221200	343000	324210	323880	88939	14710	54536	67982	101410	87115	113000	135040	107470	93786	305550	171260	42809	215560	106500	195490	367610	272660
Lmtn004049	263.13	204.12	264.136	C15H20O4	[M-H]-	Abscisic acid	Organic acids	Organic acids	21293-29-8	B	27251	32626	31564	55641	36484	44121	38417	38122	40691	20572	25193	21254	18987	30859	24932	35069	26202	30155	56926	47846	57560	21025	22819	20281	45405	57999	46178	37479	62615	48372
pmb0896	265.15	177.05	264.147	C14H20N2O3	[M+H]+	N-Feruloylputrescine	Alkaloids	Phenolamine	501-13-3	A	4640200	6797900	5911700	5642300	7803900	6932500	2797200	2866000	2953500	4501000	2559100	3397200	2698600	3991200	3908800	1458400	1961100	2044900	4221100	2797800	4020300	1567600	3487900	2463100	10934000	15010000	13720000	3678700	8203600	6113100
Lmhp002001	265.15	72.08	265.155	C14H20N2O3	[M+H]+	Val-Phe	Amino acids and derivatives	Amino acids and derivatives	-	B	109800	112090	107360	333830	459310	411640	248480	200810	218660	144200	114520	128090	231350	189380	226490	273860	197970	260080	470770	91682	291270	81407	412880	210740	207980	162330	213720	134460	425550	278370
Lmmp002013	267.17	179.07	266.163	C14H22N2O3	[M+H]+	Dihydroferuloylputrescine	Alkaloids	Phenolamine	-	B	33257	17771	29591	36217	39047	46245	22107	26892	36426	22232	32734	33936	9394.2	2635.9	6740.5	11672	9446.7	7760.9	25821	12930	15644	18476	16728	21689	33952	92866	72078	42219	50773	66920
Hmsn000210	133.01	115.01	266.224	C17H30O2	[M-H]-	Methyl 7,10-hexadecadienoate	Lipids	Free fatty acids	-	B	1399700	1529600	1446000	1515900	1453800	1341800	1404800	1089700	1192000	1441900	1464900	1354100	1517200	1819700	1644600	1467200	981220	1198800	1324700	1129800	1368000	1351300	1253300	1331500	1461700	1494300	1351400	1246100	829620	855270
pme1184	268.1	152	267.097	C10H13N5O4	[M+H]+	Deoxyguanosine	Nucleotides and derivatives	Nucleotides and derivatives	961-07-9	A	1540900	1106700	1311900	6055700	5823000	5800700	2763600	3356400	3259000	4786100	4681800	4679400	1283600	1126800	1294800	5103900	4043400	5058600	9860100	1354700	6899800	2160800	6906500	4480300	3150400	2398400	2689300	2688100	16147000	10612000
pme0230	268.1	136.06	267.097	C10H13N5O4	[M+H]+	Adenosine	Nucleotides and derivatives	Nucleotides and derivatives	58-61-7	A	1700200	890820	1066800	3033400	1885600	2063200	2840300	3216300	2875100	2857700	2981400	2741100	620900	859620	839770	1711100	2254400	2070700	1707900	1935700	1611100	2912500	2174400	2455600	1299000	831820	1029800	3394200	3362500	3426900
pme2890	269.06	136	268.055	C8H16N2O4S2	[M+H]+	L-Homocystine	Amino acids and derivatives	Amino acids and derivatives	626-72-2	B	9804	10590	12446	23595	32307	28343	13170	16110	17798	14243	12442	8881.8	10806	9315.8	13412	22488	23892	27219	12310	7209	11139	7292.3	27024	11527	14971	25344	18438	8966	143760	58820
mws1060	267.07	135	268.081	C10H12N4O5	[M-H]-	9-(β-D-Arabinofuranosyl)hypoxanthine	Nucleotides and derivatives	Nucleotides and derivatives	7013-16-3	A	1040200	1132500	983500	837250	538050	682590	627110	574090	597860	740990	838230	815240	1088700	883460	960830	345520	317040	323850	364010	429720	364720	634010	709420	623860	1053500	828810	928190	814570	1239200	1046700
pmp000087	269.1	177.05	268.095	C13H16O6	[M+H]+	2-Feruloyl-sn-glycerol	Phenolic acids	Phenolic acids	-	B	171720	132420	161230	234090	174270	248960	297150	565550	436080	431400	457610	476670	116540	97986	125080	151220	68969	104800	387600	232800	324840	373680	428090	370220	506010	384220	410630	277720	417140	333180
mws0383	267.23	267.23	268.24	C17H32O2	[M-H]-	Cis-10-Heptadecenoic Acid	Lipids	Free fatty acids	29743-97-3	A	4618300	2615600	2179000	990120	1465100	1394000	307020	437250	825860	847830	696630	606300	2717900	1647700	1815300	1407800	1115200	1290900	1107400	671940	731170	384620	1877400	755310	1642100	1269400	1897700	374310	696070	605270
pmp000571	271.06	153.01	270.053	C15H10O5	[M+H]+	Apigenin	Flavonoids	Flavonoid	520-36-5	A	12478	14040	16458	14038	8937	10108	12757	9564.5	14047	8007.2	9118.4	12998	8931.6	18821	24196	23420	7254.7	11353	16565	9849.9	13650	13043	10105	13060	15200	12465	12129	12621	5759.3	7698.2
mws1297	269.1	101.02	270.11	C13H18O6	[M-H]-	Benzyl β-D-Glucopyranoside	Phenolic acids	Phenolic acids	4304-12-5	B	34062	25943	23714	33298	33383	39523	33372	36977	38840	50984	45197	34894	29222	27538	33119	35115	37084	39520	36489	36911	24877	23138	29037	33805	68990	60599	67255	46953	91279	72134
Lmmn003323	271.23	225.22	272.235	C16H32O3	[M-H]-	2-hydroxyhexadecanoic acid	Organic acids	Organic acids	764-67-0	B	734090	658890	777500	1383900	1244400	1399600	903040	939790	922660	1081300	1057400	1051500	898960	692750	836460	783320	1150500	987360	999040	729720	852470	825670	856800	938740	834090	962340	903190	1012000	2333600	1737800
pmb0508	277.17	147.04	276.159	C14H20N4O2	[M+H]+	p-Coumaroylagmatine	Alkaloids	Phenolamine	7295-86-5	A	2293800	1183200	1919200	2031600	2433700	2166200	4270500	4040000	4083900	2638100	1483300	2049000	1062800	1384800	1319700	1570300	4365200	3454000	2225300	1075700	1397400	1183000	1560300	1255200	3185400	4426700	3557500	4986400	4469900	4119700
pmb1574	277.2	93	276.2	C18H28O2	[M+H]+	Octadecadien-6-ynoic acid	Lipids	Glycerol ester	-	B	269610	293710	303650	503690	512420	530640	415950	265160	359450	337960	372940	376080	317240	311280	341780	346670	342790	410100	475720	387790	439650	188860	664800	420700	386090	454790	401390	329520	340980	332240
Lmlp012720	279.16	149.02	278.152	C16H22O4	[M+H]+	Dibutyl phthalate	Phenolic acids	Phenolic acids	84-74-2	B	1602100	1475600	1489200	2479900	2164700	2731400	2314700	2991400	2791100	2110000	2545200	2397900	1567700	1541600	1664600	1964500	2201900	2171500	2011000	1947900	2236500	2137500	1924100	1907700	1766900	1695100	1659900	2774800	3742600	3182900
pmp001230	279.16	121	278.152	C16H22O4	[M+H]+	Senkyunolide M	Others	Others	-	A	4124700	3646600	3598700	6187900	5574500	7418600	5719300	7567500	7225800	5284800	6246300	5833100	4044100	3819500	4257400	5159900	5519600	5434800	5203500	4890300	5718000	5337500	4947100	4831400	4268400	3935500	3898300	7222600	9834000	8273500
mws5035	279.17	120.08	278.163	C15H22N2O3	[M+H]+	Leucylphenylalanine	Amino acids and derivatives	Amino acids and derivatives	56217-82-4	B	12610	29125	29025	28002	42901	35207	32809	11543	23224	27167	12959	26706	28932	20965	22316	30517	9416	19491	32650	16506	22140	15976	20031	17708	15380	21808	18700	19367	5983.6	7845.5
pmb1650	279.2	149.4	278.2	C18H30O2	[M+H]+	Octadeca-11E,13E,15Z-trienoic acid	Lipids	Glycerol ester	25575-00-2	B	14848000	13140000	13126000	21766000	19367000	23265000	19826000	24900000	23872000	18493000	21556000	20781000	13942000	13805000	14597000	17723000	19457000	18881000	18111000	17643000	19449000	18187000	17385000	17499000	15817000	13921000	14809000	24854000	31132000	27901000
mws0367	277.22	277.22	278.225	C18H30O2	[M-H]-	α-Linolenic Acid	Lipids	Free fatty acids	463-40-1	A	22597000	26403000	24766000	30030000	33234000	34274000	25008000	20436000	25616000	23141000	23599000	23900000	27469000	29033000	28864000	31427000	27092000	29108000	35810000	30237000	32897000	19831000	36647000	26352000	27830000	29643000	29746000	22123000	19750000	20148000
mws0366	277.22	277.22	278.225	C18H30O2	[M-H]-	γ-Linolenic Acid	Lipids	Free fatty acids	506-26-3	A	22631000	24058000	22495000	29767000	36360000	35368000	24366000	19630000	25681000	24108000	23474000	23563000	28346000	29215000	27216000	30517000	24725000	28880000	32529000	30323000	31979000	20320000	34733000	25012000	27424000	28424000	26601000	22590000	18892000	19962000
pmb0889	279.23	95.1	278.225	C18H30O2	[M+H]+	Punicic acid	Lipids	Free fatty acids	544-72-9	B	1214900	1186500	1177300	1237700	872600	1130600	669880	709290	697550	696350	702220	702420	977230	1268500	1205800	954000	964570	1001900	1081600	626850	876780	799270	1128600	927220	1809900	1541800	1639300	1103000	3403600	2280700
mws0629	281.11	166	280.106	C13H16N2O5	[M+H]+	Asp-phe	Amino acids and derivatives	Amino acids and derivatives	13433-09-5	B	25315	29150	21210	45548	38214	47911	42357	56975	33153	61434	44259	47007	28267	25762	23642	47581	45221	35297	33319	39299	43184	45707	52766	57837	31442	28400	30881	49425	42755	52331
Lmhp002501	281.15	177.05	280.142	C14H20N2O4	[M+H]+	N-Feruloylhydroxyputrescine	Alkaloids	Phenolamine	-	B	20958000	17989000	19536000	30692000	45634000	41767000	26272000	28570000	22693000	30635000	20191000	26830000	10740000	14224000	12628000	11061000	11281000	10508000	19432000	16816000	21913000	16067000	25408000	21010000	29943000	37020000	34344000	29153000	35187000	30567000
mws0396	281.25	281.25	282.256	C18H34O2	[M-H]-	Elaidic Acid	Lipids	Free fatty acids	112-79-8	A	31140000	29617000	22016000	19818000	32790000	22697000	20486000	19568000	29761000	26368000	26623000	26424000	25402000	31255000	32755000	31795000	21648000	23975000	30917000	18390000	23145000	11554000	27623000	17527000	28262000	29246000	37735000	19490000	25621000	22947000
mws2623	281.25	281.25	282.256	C18H34O2	[M-H]-	11-Octadecanoic acid(Vaccenic acid)	Lipids	Free fatty acids	506-17-2	A	8943800	10009000	6557700	7388700	11177000	9371000	6751500	5848100	8382300	8689800	8722800	8180200	8268000	10116000	10050000	10391000	7649700	7026500	10032000	5976600	7951000	3207500	8230900	5234500	8160300	9980300	11641000	6141800	7153000	6316200
pme1178	284.1	152	283.092	C10H13N5O5	[M+H]+	Guanosine	Nucleotides and derivatives	Nucleotides and derivatives	118-00-3	A	17043000	22553000	19872000	25515000	24950000	24897000	15092000	9654900	13223000	15703000	14284000	16236000	19639000	19005000	21032000	22439000	15502000	18936000	21484000	12950000	17853000	11988000	22599000	16171000	21281000	21783000	20573000	15354000	16119000	15203000
mws0668	283.07	151	284.076	C10H12N4O6	[M-H]-	Xanthosine	Nucleotides and derivatives	Nucleotides and derivatives	146-80-5	A	1330200	1371300	1249100	1631600	1108100	1321800	1566800	1638100	1637500	1345900	1147000	1272100	1216200	1053600	1042700	968870	794850	928620	1465000	1488900	1537400	956680	1330200	1174600	1278200	1597300	1281400	1990100	2580800	2144900
mws1521	285.1	121.03	286.105	C13H18O7	[M-H]-	Salicin	Phenolic acids	Phenolic acids	138-52-3	B	6274.9	12670	12130	8293.7	18272	15114	16236	12232	10472	15825	18662	18558	11029	5996.6	8312.4	9012.5	9440.2	12209	10955	12917	16751	8995.4	9538.1	9791.9	14530	14287	12541	18909	14952	16913
mws1436	287.29	97.2	286.287	C18H38O2	[M+H]+	1,18-Octadecanediol	Lipids	Free fatty acids	3155-43-9	B	11890	9832.1	10023	28745	19542	21978	42492	22815	30287	43751	58468	50807	8928.2	6129.9	8743.1	9799.9	12478	12134	32653	15764	22413	23047	26202	19803	11742	12506	12029	23194	42052	30010
pmb3081	289	97	290.004	C6H11PO11	[M-H]-	Glucarate O-Phosphoric acid	Others	Saccharides and Alcohols	-	A	1315300	1332300	727740	617600	617260	503070	589180	614280	566410	700120	608670	568490	1418300	1158800	1016800	690680	560830	573770	654340	661170	566560	769360	609370	573070	1025400	1052800	772560	597390	401850	362130
pmb2657	289.1	97.1	290.123	C10H18N4O6	[M-H]-	Argininosuccinic acid	Organic acids	Organic acids	2387-71-5	B	320920	408360	365450	107600	69935	88047	205340	119400	161560	119390	92636	113770	252720	351020	330530	106270	107470	99229	90631	126780	105990	119410	68424	88712	274700	195380	252900	128410	42526	71935
pmn001728	289.12	203.08	290.127	C15H18N2O4	[M-H]-	N-Acetyl-DL-tryptophan	Amino acids and derivatives	Amino acids and derivatives	87-32-1	A	334640	377680	386920	537070	559400	526950	903870	541910	733610	621010	643920	596000	126090	93854	143150	195860	211680	176060	220870	187590	227950	231620	257720	232310	515050	673600	597930	943520	650160	721920
pmb3374	289.13	119.1	290.138	C14H18N4O3	[M-H]-	N-p-Coumaroyl hydroxydehydroagmatine	Alkaloids	Phenolamine	-	B	373060	128520	244920	141680	194880	192520	600740	586530	613090	223090	83272	172160	76149	108610	89534	51817	103030	88348	78715	59470	67540	72931	82439	64451	956950	715250	760950	368070	762170	516110
pmb0885	291	190.9	290.188	C18H26O3	[M+H]+	4-oxo-9Z,11Z,13E,15E-octadecatetraenoic acid	Lipids	Glycerol ester	-	B	245490	254260	273110	151900	121140	153840	146580	218200	198490	127310	126830	153800	252530	282470	307050	173960	275710	258240	139500	138070	148260	179850	169000	177710	282340	297160	305880	215480	210590	220170
pmb2893	291.15	119.2	292.154	C14H20N4O3	[M-H]-	N-p-Coumaroylhydroxyagmatine	Alkaloids	Phenolamine	-	B	165270	69695	123020	159190	197210	188720	498060	406450	436390	159150	85111	91168	55560	95860	78632	87683	197960	151690	155220	98443	125810	102130	112800	106350	868400	322110	603420	327480	908580	569590
pmb2787	293.21	275.1	294.219	C18H30O3	[M-H]-	9-KODE	Lipids	Free fatty acids	54232-59-6	A	115320	148780	116700	163740	169040	167080	110300	71142	90283	97601	78492	83996	126620	151690	142240	162330	131610	145180	212440	125880	168220	70087	212150	122100	252260	252220	254790	117720	156870	126160
pma3606	295.2	179.2	294.219	C18H30O3	[M+H]+	9-Hydroxy-10,12,15-octadecatrienoic acid	Lipids	Glycerol ester	-	B	2195600	2332100	2314500	3390700	2267300	3009900	1728300	1733200	1864000	1786700	2263200	2116500	1773800	2050300	2022300	1429400	1549500	1646400	1573200	1498800	1607200	1506300	1943400	1704500	2643600	2109300	2402100	1738000	5086600	3522900
pmb2778	295.23	277.3	296.235	C18H32O3	[M-H]-	9,10-EODE	Lipids	Free fatty acids	65167-83-1	A	1011300	972650	994400	1272000	852830	1041300	672760	667120	695590	730160	682340	667060	842160	989300	889570	892020	912180	830370	941040	577110	782100	634270	1006300	742940	1643900	1432700	1571500	992020	3413700	2174100
Rfmb091	295.23	195.14	296.235	C18H32O3	[M-H]-	9-Hydroxy-10,12-octadecadienoic acid	Lipids	Free fatty acids	15514-85-9	B	763010	729130	735270	703560	478020	560120	388790	386660	398630	399980	372760	370800	643550	748380	661910	540570	580260	544890	576110	343040	457530	395740	572070	424080	942780	853670	881290	548740	1627700	1074600
pme1474	298.1	136	297.09	C11H15N5O3S	[M+H]+	5'-Deoxy-5'-(methylthio)adenosine	Nucleotides and derivatives	Nucleotides and derivatives	2457-80-9	A	35518000	33506000	35753000	34875000	30885000	33001000	29721000	29599000	32396000	30319000	30977000	31367000	28973000	31827000	30787000	28789000	30694000	32068000	29819000	29984000	30994000	36004000	31986000	35325000	35729000	33849000	35197000	40704000	38568000	38890000
pmb0197	298.1	166.3	297.107	C11H15N5O5	[M+H]+	N2-methylguanosine	Nucleotides and derivatives	Nucleotides and derivatives	2140-77-4	B	83907	74734	87856	248050	260030	269530	159390	158370	163970	201980	249170	227250	72789	83804	91617	232400	176150	179350	224360	96128	159650	137090	243890	198610	97042	99917	107820	129720	136890	148770
pmp001204	299.09	284.1	298.084	C17H14O5	[M+H]+	Apigenin-7,4'-dimethylether	Flavonoids	Flavonoid	5128-44-9	B	11857	14267	12473	30347	25060	23564	60796	5069.6	27558	59866	19061	43190	6081.3	25793	9634.7	76547	6224	8145.3	9728.1	6919.3	8378.3	8772	9442.4	9747	72787	28200	50288	21970	45389	40579
pmf0297	297.32	183.1	298.324	C20H42O	[M-H]-	1-Eicosanol	Lipids	Glycerol ester	629-96-9	B	59920	53471	55823	57116	39080	51714	65494	81419	78112	114590	97342	103460	46521	64076	48918	61951	42911	39408	57994	56725	57668	59539	82357	70427	105540	101420	101880	107470	306840	201730
mws0058	299.06	284	300.063	C16H12O6	[M-H]-	Diosmetin	Flavonoids	Flavonoid	520-34-3	A	255210	400810	351090	185010	164660	165050	170400	105500	114720	141340	124060	154040	474030	465170	638030	348040	206680	274940	293250	225280	310980	275340	344100	325380	300210	346810	267910	131080	73892	99025
Zmxn001997	299.08	137.02	300.084	C13H16O8	[M-H]-	Isosalicylic acid O-glycoside*	Phenolic acids	Phenolic acids	-	A	141110	172530	105700	58080	43049	49810	37261	41862	36776	112570	62169	54550	129790	123830	133260	71952	79168	62499	42950	47064	64013	60600	38378	64812	185550	110750	147570	58233	15482	26751
pmb3142	299.1	137.1	300.085	C13H16O8	[M-H]-	Salicylic acid glucoside*	Phenolic acids	Phenolic acids	-	A	1519100	1813600	1315400	1195500	1366300	1155000	1509400	1414900	1439900	1652500	1505400	1615400	1632800	1866500	1853900	1452900	1304000	1489000	1014200	1219900	1087400	1522600	1368500	1375300	2109800	1774700	1859000	1532300	1221600	1294900
pme2816	301.2	209.2	300.209	C20H28O2	[M+H]+	4-Oxoretinol	Others	Vitamin	62702-55-0	B	21407	20619	23998	10949	8012	8531	13743	23400	16732	11043	10734	11849	21644	28563	27111	17489	28426	28388	12095	13959	11100	22678	12961	18237	26212	21240	21376	16928	11855	13936
Zmhn000892	301.09	139.05	302.1	C13H18O8	[M-H]-	4-O-glucosyl-3,4-dihydroxybenzyl alcohol	Phenolic acids	Phenolic acids	-	B	70339	75806	65110	73700	58936	65857	86873	65262	85315	76305	80744	83374	100180	117550	117310	93500	81306	89995	70234	76902	72141	103500	79557	74421	66480	66234	67912	81613	73964	61110
mws0049	307.08	139	306.074	C15H14O7	[M+H]+	Gallocatechin	Flavonoids	Flavanols	970-73-0	B	9	9	9	9	9	6456.2	9	9	9	9	49007	9	3101.3	84203	9	151090	9	9	9	9	9	9	9	9	9	9	9	9	9	5025.6
pmb0496	307.18	177.05	306.169	C15H22N4O3	[M+H]+	N-Feruloylagmatine	Alkaloids	Phenolamine	-	A	3791000	1072500	2496900	2466200	2987100	2677300	3659500	3532700	3752000	4355500	2708200	3769400	335850	221790	331490	419920	352080	553020	1512000	763680	1207100	1490900	1298800	1262900	7346500	6221900	7114900	4630100	9837800	7360700
pme1086	306.08	143	307.084	C10H17N3O6S	[M-H]-	Glutathione reduced form	Amino acids and derivatives	Amino acids and derivatives	70-18-8	A	1167300	974680	860500	956680	872140	739890	808900	1181500	903520	733510	826350	705130	1173800	1025700	857110	810100	681850	656060	868930	965570	862870	860900	918090	858600	568430	1062500	811140	1103200	820890	837400
pmb2855	307	145	308.122	C11H20N2O8	[M-H]-	L-Glutamine O-hexside	Amino acids and derivatives	Amino acids and derivatives	-	B	42141	36582	29792	58555	59084	60294	56962	67392	67639	68593	85313	79717	58708	45761	35936	58120	59058	53541	51938	64177	61547	70974	71719	70022	39991	37318	42037	57883	115970	79000
pmn001610	307.26	307.3	308.272	C20H36O2	[M-H]-	Eicosadienoic acid	Lipids	Free fatty acids	5598-38-9	A	380040	679080	341520	485150	765980	825980	433980	253170	454690	601780	411310	471660	531870	587760	542660	729240	456320	506940	832800	383990	608530	161770	584780	331330	447820	602580	735480	303190	217140	280880
pmn001606	309.28	309.3	310.287	C20H38O2	[M-H]-	Eicosenoic acid	Lipids	Free fatty acids	26764-41-0	B	1161000	969320	806440	1372200	2034700	1156700	2186700	1197400	1493700	889070	1379600	988560	1324700	1165800	1431900	1175600	1606200	1077800	1105200	1260400	1163600	707390	1349200	809280	1309400	1833200	838230	2124600	695320	2084500
pme3967	312.13	180	311.123	C12H17N5O5	[M+H]+	2-(Dimethylamino)guanosine	Nucleotides and derivatives	Nucleotides and derivatives	2140-67-2	A	451070	462350	463100	365370	334740	391880	187380	181090	213790	251150	289730	253750	469230	374270	488740	312800	240310	297200	305040	216510	275610	293660	430450	346030	383750	467750	404070	284190	344300	315690
pmb2933	311.1	149.1	312.048	C13H12O9	[M-H]-	Caftaric acid	Phenolic acids	Phenolic acids	67879-58-7	B	518460	590610	493070	447380	417910	411430	514620	395950	462810	401830	390830	372630	756250	821100	806060	695510	697960	712780	613930	682410	611090	591670	559560	545490	611140	496090	520150	399660	381820	372050
pmp000106	313.11	298.1	312.1	C18H16O5	[M+H]+	5,7,4'-Trimethoxyflavone	Flavonoids	Flavonoid	5631-70-9	B	3771.7	3185.6	4166.8	2855.8	3062.4	2995.9	2575.7	5908.5	2105.8	2887.6	400320	2969.5	3605.7	710500	2319.2	1822600	2840.3	4038	3131.9	2970.3	10864	34310	3072.5	21709	2307.4	2448.1	2600.1	3320.2	11060	2211.9
pmb2804	311.1	171.3	312.1	C18H32O4	[M-H]-	13-HPODE	Lipids	Glycerol ester	33964-75-9	B	48261	47165	47584	80266	53101	65560	50969	64097	58878	49783	51379	49803	37408	43388	40836	42275	47004	45102	45239	38918	41824	35390	48211	40739	118320	77463	98250	58090	202910	135200
mws0636	313.15	166	312.147	C18H20N2O3	[M+H]+	Phe-Phe	Amino acids and derivatives	Amino acids and derivatives	2577-40-4	B	5538.1	8590.1	5551.8	21243	27610	31011	13089	10083	10782	17793	8965.9	10411	8010.9	8902.7	14453	9842.8	8268	10737	11379	6916.1	9232.2	4021.1	28424	4300.7	21172	12891	15535	11382	52876	43294
pmn001689	311.22	223.17	312.23	C18H32O4	[M-H]-	9-Hydroxy-12-oxo-10-octadecenoic acid	Lipids	Free fatty acids	-	B	30062	33306	32954	233930	152380	199650	50040	39942	43452	105080	77715	82276	38449	39621	38511	88666	51061	72041	84853	46356	63514	33452	177710	82330	163980	130620	144400	93067	357910	225340
Lmtn001630	312.11	150.05	313.116	C14H19NO7	[M-H]-	2-β-D-Glucopyranosyloxy-2-phenylacetic acid amide	Alkaloids	Alkaloids	-	B	731280	1054600	801430	297510	314210	299980	1202600	368400	802960	268230	252830	258780	2803700	3124400	2802400	1443300	1664400	1615300	1338300	1313500	1325100	1326000	1235000	1231300	1211300	969780	982940	589750	412220	463710
mws1433	314.14	177.05	313.131	C18H19NO4	[M+H]+	Feruloyltyramine	Alkaloids	Phenolamine	66648-43-9	A	13623	26170	21182	151660	98666	126400	64994	97391	83471	164470	193450	176300	5059.4	11139	6518.2	32797	8998	15092	35901	22183	29309	21348	51184	37766	330390	121200	236250	134170	633340	400030
Rfmb089	313.24	295.23	314.246	C18H34O4	[M-H]-	9,10-Dihydroxy-12-octadecenoic acid	Lipids	Free fatty acids	263399-34-4	A	106020	95102	96320	51621	54323	52573	49518	47496	46847	60697	40273	49570	133540	123000	127170	74835	79465	82655	71324	88416	77865	106350	94197	97042	153330	110150	132780	75781	75877	69770
pmb2831	315.1	153.1	316.079	C13H16O9	[M-H]-	Protocatechuic acid O-glucoside	Phenolic acids	Phenolic acids	-	B	7196900	8415900	7910100	10434000	11862000	11239000	9160700	10283000	10068000	13097000	11869000	11991000	6749500	8434800	7802100	10875000	8556400	9966500	10001000	12495000	11178000	9776300	11536000	10174000	19894000	20385000	19868000	16180000	35718000	27356000
pmb2871	315.07	153	316.079	C13H16O9	[M-H]-	2,5-Dihydroxy benzoic acid O-hexside	Phenolic acids	Phenolic acids	-	A	975730	915410	881640	1430600	1421900	1227000	1783300	1374800	1538200	1997400	1819900	1590700	809670	951600	530370	1158200	1174500	1191000	1378600	1398900	1429400	1320300	1664600	1516500	3892800	3239000	3437700	2257200	6984600	5104600
Hmtn001120	315.11	153.06	316.116	C14H20O8	[M-H]-	5-(2-Hydroxyethyl)-2-O-glucosylohenol	Phenolic acids	Phenolic acids	-	B	99383	181610	148690	101870	77790	98625	135850	146260	88689	109440	133670	127400	399310	441240	424390	419400	316790	448150	524060	501650	503190	483420	519100	482640	287180	258690	259660	147240	236570	171220
pmb0751	321.1	147.3	320.09	C16H16O7	[M+H]+	Trans-5-O-(4-Coumaroyl)shikimate	Phenolic acids	Phenolic acids	-	B	24404	28899	22165	50096	20275	29812	16663	13059	15331	36030	23730	18393	26456	31793	35807	16265	13365	16314	10001	11850	14347	18677	31097	25453	72976	39401	51695	27750	52589	52401
pme3174	324.06	112	323.052	C9H14N3O8P	[M+H]+	Cytidine 5'-monophosphate(Cytidylic acid)	Nucleotides and derivatives	Nucleotides and derivatives	63-37-6	B	105870	146930	101370	73621	108280	97402	93935	29508	40835	48827	58692	67593	62462	121470	71597	103750	72152	76468	47557	39399	61784	65182	64405	64713	55019	58503	82560	46597	16194	36673
pme3188	323.03	211	324.036	C9H13N2O9P	[M-H]-	Uridine 5'-monophosphate	Nucleotides and derivatives	Nucleotides and derivatives	58-97-9	B	84723	88092	94141	110380	110200	91377	68541	42014	57440	53308	63607	61301	47789	46612	63695	80009	68582	70744	44687	56327	41731	74113	58023	60264	62549	55230	58572	65763	54380	58642
pmf0359	325.09	163	324.084	C15H16O8	[M+H]+	Skimmin	Lignans and Coumarins	Coumarins	93-39-0	B	165840	163080	187520	263700	235630	230520	182590	239280	247370	350630	332770	300510	131740	193730	225500	136360	162660	154320	144160	156040	157410	154890	169670	196660	151000	199220	150160	264970	231330	262390
Lmhn002140	325.06	193.05	326.064	C14H14O9	[M-H]-	Feruloyltartaric acid (Fertaric acid)	Phenolic acids	Phenolic acids	-	B	24371	30435	35823	18418	24277	20363	28462	25578	35686	22118	17405	18630	21732	24434	26593	25314	34296	31086	22226	38738	30199	34002	29565	34630	23365	29990	31420	16978	15453	16758
Zmdn001863	325	193	326.078	C18H14O6	[M-H]-	2-(7-Dihydroxyl)-benzofuranyl-ferulic acid	Phenolic acids	Phenolic acids	-	B	25676	20827	16110	9548	13296	13794	18563	16209	18789	10166	11863	13022	19495	16108	13797	12419	16979	20955	18148	27267	14031	23290	14957	13832	10397	19290	17978	13700	5694.6	8417.7
pmn001419	325.09	163.04	326.1	C15H18O8	[M-H]-	1-O-[(E)-p-Cumaroyl]-β-D-glucopyranose	Phenolic acids	Phenolic acids	-	A	847040	809570	831540	1236200	1757300	1477100	983760	1661700	1385200	1643500	1432100	1570400	889320	703130	828070	955840	783620	933230	1247400	1102500	1134200	1257700	1842800	1525800	1655000	2296400	1968900	1373500	1954500	1694600
Hmlp002408	328.1	148.03	327.095	C14H17NO8	[M+H]+	HBOA-Glc	Alkaloids	Alkaloids	-	A	50291	85564	77762	17464	23055	23267	317040	38428	192530	35952	23826	30665	111760	108660	121810	85937	80446	88254	93840	73522	88320	63517	74156	69250	130390	63029	84497	57768	62376	64194
pmn001690	327.14	165.09	328.152	C16H24O7	[M-H]-	3-Hydroxy-4-isopropylbenzylalcohol 3-glucoside	Phenolic acids	Phenolic acids	-	B	503610	575830	553710	522610	572380	567320	752450	364550	575600	612770	497450	541990	221770	219980	228610	250070	210580	218050	220260	234170	210650	211830	191070	211260	437740	494870	462250	294160	246960	261040
pmn001691	327.22	291.2	328.225	C18H32O5	[M-H]-	9,12,13-Trihyroxy-10,15-octadecadienoic acid	Lipids	Free fatty acids	-	A	176410	202640	164670	220180	126790	173000	127190	83845	93106	92192	81076	89909	98248	118710	109830	92757	83056	77488	86420	95936	86796	88805	101310	88156	335350	192790	282840	162380	354960	235880
mws0884	328.05	134.2	329.053	C10H12N5O6P	[M-H]-	Cyclic AMP	Nucleotides and derivatives	Nucleotides and derivatives	60-92-4	A	77436	35364	52492	141150	87865	96567	135830	145370	148290	129730	158200	142790	25010	34004	32605	84083	106520	95734	82202	85755	69257	140640	102560	106910	54586	29977	47050	163950	126850	142340
pmp000004	331.08	316.06	330.074	C17H14O7	[M+H]+	Jaceosidin	Flavonoids	Flavonoid	18085-97-7	B	2798900	3534200	3513600	2727600	2090100	2265300	3309700	2009500	2537400	2199500	1824600	2292400	2592700	3230500	3622600	3060700	2135300	2731500	3116300	2413900	3169500	2788100	2796800	3319200	3069700	3175400	3028400	2036300	1209900	1811300
Lmzp004885	331.08	315.05	330.074	C17H14O7	[M+H]+	Tricin	Flavonoids	Flavonoid	520-32-1	B	6462700	8270900	7618700	5905000	4854200	5001400	7011000	4405900	5782000	4730800	4043700	5355300	5412300	7284200	8819400	6400400	4702400	6121000	6992800	5035200	6758100	6112400	5702800	6656000	7311900	6927200	6684900	4762300	2707000	3897400
HmLn002358	329.09	167.03	330.095	C14H18O9	[M-H]-	Vanillic acid-glucoside	Phenolic acids	Phenolic acids	-	B	1075500	1165700	935550	460570	419890	414820	260240	263310	258040	312290	298210	295930	1096600	1257400	1099100	630280	696450	610780	359890	383010	362360	372930	314130	386170	941630	1012400	897210	345960	150420	216630
pmn001694	329.23	229.15	330.241	C18H34O5	[M-H]-	9,10,13-Trihyroxy-11-octadecadienoic acid	Lipids	Free fatty acids	-	B	316740	323410	305760	660520	309920	480970	313610	274550	296330	284640	253770	260250	188120	201820	187560	222270	257890	222130	219130	188790	218250	222300	279090	232260	1214000	728300	959630	449060	1618100	1102400
pmp001284	331.28	313.27	330.277	C19H38O4	[M+H]+	Monopalmitin	Lipids	Glycerol ester	542-44-9	B	20053	16145	16155	19228	25039	22308	16952	18597	20703	18833	20849	20361	20777	14167	30225	21041	17983	25443	18853	16282	24336	18726	21846	18862	19770	25445	18214	23971	20204	22009
pme3184	332.08	136	331.068	C10H14N5O6P	[M+H]+	2'-Deoxyadenosine-5'-monophosphate	Nucleotides and derivatives	Nucleotides and derivatives	653-63-4	B	437060	395150	419640	333690	293610	373640	371510	384540	423790	447280	469690	489490	393330	430060	452310	370240	457110	459590	436180	387030	439710	465440	421310	458500	458410	472490	463150	447690	437560	440430
pmb0789	332.13	152.07	331.127	C14H21NO8	[M+H]+	Pyridoxine-5'-O-glucoside	Others	Vitamin	-	B	903800	875880	870240	890430	807690	919850	1071600	1094200	1279100	1108100	1168900	1249300	798620	974370	925320	1035300	1189400	1250600	1080800	1031100	1196300	1189400	1095700	1234100	1141300	1172000	1201700	1342600	1407600	1314100
pmc0066	333.05	137.05	332.052	C10H13N4O7P	[M+H]+	2'-Deoxyinosine-5'-monophosphate	Nucleotides and derivatives	Nucleotides and derivatives	3393-18-8	B	19485000	22876000	20775000	17969000	18221000	17842000	18707000	12736000	14929000	16345000	15050000	15936000	16337000	23027000	19750000	19796000	19823000	20424000	17613000	19456000	17373000	19086000	15044000	17109000	20396000	20147000	19872000	16159000	4130500	11786000
pmn001518	331.07	169.01	332.074	C13H16O10	[M-H]-	1-O-Galloyl-β-D-glucose	Phenolic acids	Phenolic acids	58511-73-2	A	185970	242560	227390	206540	242850	214010	317180	240030	245810	263810	227010	263550	340820	435500	332930	303410	271420	242490	219450	184820	212490	225460	254950	252630	801130	671170	704600	325840	1205200	751480
pmb0776	337.15	177.4	336.147	C20H20N2O3	[M+H]+	N-Feruloyl tryptamine	Alkaloids	Phenolamine	53905-13-8	A	14497	4192	8884.4	147660	424040	275410	91631	253200	181370	206260	252100	231420	12015	3481.5	6405.5	27447	12117	20785	94267	35784	64114	81686	152710	117220	131950	142020	135570	91969	502380	328570
pmb0498	337.19	207.07	336.18	C16H24N4O4	[M+H]+	Sinapoylagmatine	Alkaloids	Phenolamine	-	A	953800	497670	750100	2380400	2961200	2668800	1794600	1334300	1635000	3586600	2474400	3030700	123840	154570	149720	474830	447170	482650	835590	618480	703490	876800	1299400	1073700	2660800	2002000	2313800	4056500	7650800	5250300
pmb1207	339.09	249.04	338.079	C19H14O6	[M+H]+	O-Feruloyl 3-hydroxylcoumarin	Lignans and Coumarins	Coumarins	-	A	952820	1098800	1208600	1417800	1464900	1450500	2697500	1908900	2315100	1373800	1427600	1327300	717480	962220	853020	1115300	1332600	1384800	1421400	1207600	1346300	1154700	1203000	1241500	1159300	1538900	1312400	2169600	1421800	1718200
pmb4777	337.09	161.1	338.1	C16H18O8	[M-H]-	4-Hydroxy-7-methoxycoumarin-β-rhamnoside	Lignans and Coumarins	Coumarins	-	B	80982	97684	97442	30772	36727	39353	40200	22999	31132	13396	20064	15509	140780	142890	149400	167240	212300	188110	81713	103050	84836	88495	65309	77180	104740	95794	97066	48047	25907	36961
pmp000232	339.11	147.04	338.1	C16H18O8	[M+H]+	Cis-3-p-coumaric quinic acid	Phenolic acids	Phenolic acids	-	A	264430	280630	163530	170720	112530	168400	89084	259770	261320	289960	107460	126400	555050	404670	523860	141450	158480	148150	74600	59695	325620	130590	123720	129630	395290	224780	248780	106180	296200	181260
pma0149	341.08	207.07	340.079	C15H16O9	[M+H]+	Sinapoyl malate	Phenolic acids	Phenolic acids	92344-58-6	B	20527	9969.8	11091	37446	39557	36919	29293	37925	25490	36190	44634	43821	18376	16596	20935	20900	19614	16478	22758	18124	28511	20237	19830	21817	28298	16576	19939	44504	40820	57800
pme3311	339	97	340.12	C6H14O12P2	[M-H]-	D-Fructose-1,6-biphosphate	Others	Saccharides and Alcohols	-	B	110200	113270	99760	108830	177570	130260	159380	167070	150030	157180	167750	157780	114800	134120	106720	149660	131920	121600	215530	125410	174810	163480	170950	204700	98635	156560	93966	176650	169480	141760
pme0519	341.11	119	342.116	C12H22O11	[M-H]-	D-(+)-Sucrose	Others	Saccharides and Alcohols	57-50-1	A	1126700	994920	1142600	291220	282820	331830	531700	571080	508310	440790	407660	400510	942430	841500	815950	410510	326630	316100	472540	411160	509960	304370	286810	355560	961430	1213900	1016200	484710	482310	397070
mws0264	341.11	119	342.116	C12H22O11	[M-H]-	D-(+)-TrehaloseAnhydrous	Others	Saccharides and Alcohols	99-20-7	A	283910	285000	345110	105810	113740	102270	149170	145440	188290	125610	172070	162940	279340	265330	279040	130860	107020	109890	122930	136100	168630	105240	84354	96018	339830	316540	347090	181560	132660	120980
mws1080	341.11	179	342.116	C12H22O11	[M-H]-	Galactinol	Others	Saccharides and Alcohols	3687-64-7	A	2699200	2672300	2701400	757180	683050	799630	1213300	1450500	1391900	1179200	1015800	1038100	2335800	2263600	1885000	1090800	734970	832010	971550	951990	1226400	748450	643610	874520	1980600	2603500	2613300	1325700	1193000	970260
mws5038	341.11	89.02	342.116	C12H22O11	[M-H]-	Isomaltulose	Others	Saccharides and Alcohols	13718-94-0	A	515260	534020	557140	160730	192080	246410	287050	325010	278280	228090	240500	241520	507670	478440	499750	214860	221470	189240	190630	200500	293120	179460	163240	194490	508650	644100	561780	297780	277980	216330
mws1333	341.11	113	342.116	C12H22O11	[M-H]-	Melibiose	Others	Saccharides and Alcohols	585-99-9	A	16032	19269	14389	32058	34631	38621	30501	33695	31374	25815	28142	26034	26241	22337	21482	38312	36148	40110	35399	28283	39620	36106	40280	32972	24507	29551	25913	33273	29867	27772
mws0906	341.12	179	342.131	C16H22O8	[M-H]-	Coniferin	Phenolic acids	Phenolic acids	531-29-3	B	54892	81492	128290	9	20269	14964	12325	27498	22029	22112	55865	25211	73353	152590	64074	158550	29713	24080	25852	25553	23788	19383	13569	22144	90207	56379	67525	9	5085.9	6841
pmb2211	343.3	240.7	342.288	C19H38N2O3	[M+H]+	Cocamidopropyl betaine	Alkaloids	Alkaloids	4292-10-8	A	71208	45082	66120	22580	16264	20740	47061	75239	62796	85425	85329	86587	32921	40024	44812	22835	39305	34576	32908	37071	36299	71588	75034	77242	43561	40390	40846	63138	97947	80529
Hmlp002485	344.1	164.03	343.09	C14H17NO9	[M+H]+	DIBOA-Glucoside	Alkaloids	Alkaloids	-	B	41688	63281	54255	21506	8445.6	31689	140590	21182	78411	18836	17447	9	167240	168050	173370	155400	181450	208200	157630	148670	191500	187970	145090	178840	43291	52175	40004	41530	16543	26966
mws1474	345.1	284	344.09	C18H16O7	[M+H]+	5,7-Dihydroxy-3',4',5'-trimethoxyflavone	Flavonoids	Flavonoid	18103-42-9	A	256940	454850	364050	1109000	1012500	965150	668510	340370	491950	771740	671310	822260	86534	81020	101190	340040	220330	293000	629650	216030	464280	354440	362040	384680	229010	342420	274520	478480	270590	368310
Lmmn000774	343.1	181.05	344.111	C15H20O9	[M-H]-	Dihydrocaffeoylglucose	Phenolic acids	Phenolic acids	-	B	37583	37370	42689	60258	64783	65320	63660	79219	62532	65086	80564	85178	68169	57734	56525	67217	72187	82500	97463	93913	81571	124740	91478	97744	57314	64419	53217	67433	90511	59002
Zmln000899	343.11	181.05	344.111	C15H20O9	[M-H]-	Syringic Aldehyde-glucoside	Phenolic acids	Phenolic acids	-	B	725650	527150	570490	657710	687120	676390	1681900	1036100	1478100	650420	604020	637020	2113700	1838300	2246000	1943900	2520500	2295600	2132500	2181000	2386300	2466000	3001400	2799700	841060	917600	856580	1112400	1147700	1115100
mws0609	344.04	150	345.047	C10H12N5O7P	[M-H]-	Guanosine 3',5'-cyclic monophosphate	Nucleotides and derivatives	Nucleotides and derivatives	7665-99-8	A	526000	519830	527190	476610	420330	476550	320320	218540	273050	377960	427430	381420	375770	339750	335870	369110	341220	310900	264680	266780	254280	624560	398020	492510	390020	266130	348670	327500	257080	265860
pmb0801	346.11	184.1	345.106	C14H19NO9	[M+H]+	4-Pyridoxic acid O-hexoside	Others	Vitamin	-	A	998290	1194700	1129400	1459900	1402100	1436900	1978800	1222500	1613100	1662500	1480700	1683800	1521500	1503400	1676800	2027700	2146600	2220300	2433900	2246400	2329900	2429700	2456900	2395700	831070	1456900	1136400	1798900	1410900	1477000
pmb0981	348.07	136	347.063	C10H14N5O7P	[M+H]+	Adenosine 5'-monophosphate*	Nucleotides and derivatives	Nucleotides and derivatives	61-19-8	A	1158700	418330	623040	637830	271200	385380	296440	244040	181480	286530	799410	485660	277610	1192900	834520	466980	846050	919800	291450	330220	198760	1241900	389910	715880	975930	459740	723740	355400	1137300	982430
mws0874	346.06	210.9	347.063	C10H14N5O7P	[M-H]-	3'-Aenylic acid*	Nucleotides and derivatives	Nucleotides and derivatives	84-21-9	A	45676	43782	32198	23877	38847	29614	48104	15232	28346	20880	19296	17354	52039	58206	40262	38812	29068	38719	24608	35199	33840	20867	41368	29866	21500	32228	32016	23907	11954	12134
pmb3093	351.1	105.1	352.079	C16H16O9	[M-H]-	Esculetin 7-O-quinic acid	Lignans and Coumarins	Coumarins	-	B	97297	138230	74217	13725	20570	34164	15009	97666	51780	95156	77268	41865	291940	236600	206330	144420	69163	66232	27519	15997	96922	67584	47761	63644	87784	64185	61629	10028	25873	14246
pmb0770	353.15	177.1	352.142	C20H20N2O4	[M+H]+	N-Feruloyl serotonin	Alkaloids	Phenolamine	68573-23-9	B	65761	22130	46588	264770	143960	179370	223540	335170	314280	183860	217150	263160	125090	40095	93387	68931	42067	52245	138630	98375	95525	214850	107680	188230	219550	170200	184520	142410	935020	577180
Lmhp011388	353.27	261.22	352.261	C21H36O4	[M+H]+	2-γ-Linolenoyl-glycerol	Lipids	Glycerol ester	-	B	2181000	3437700	2577600	5344500	6013100	5730600	4443600	3273300	3958500	4782600	3785700	4064300	2967300	2058400	2137600	3305300	2678800	2898600	4006400	3335200	3889300	1982700	5473400	2997600	2649900	3652900	3294300	3732000	2902100	2709200
pme1816	353.09	191	354.095	C16H18O9	[M-H]-	Neochlorogenic acid(5-O-Caffeoylquinic acid)*	Phenolic acids	Phenolic acids	906-33-2	A	1017500	1500200	804680	165690	148700	241630	120700	893200	602040	917550	680380	418640	2857200	2435500	2325200	1285800	700420	594630	246440	165440	863710	605850	465920	508100	867490	820760	650860	123440	237200	156810
mws0178	353.09	191.01	354.095	C16H18O9	[M-H]-	Chlorogenic acid*	Phenolic acids	Phenolic acids	327-97-9	B	83210	95818	123320	15344	14240	57968	32811	164880	124840	101460	739420	29364	174340	1466000	159780	3469600	106300	75474	26734	18232	245400	69556	48783	55276	81641	85602	59230	20067	99133	28930
mws2108	353.09	135.1	354.095	C16H18O9	[M-H]-	Cryptochlorogenic acid*	Phenolic acids	Phenolic acids	905-99-7	B	39204	52707	36460	31073	25552	20990	29125	32579	26692	18312	32305	22420	128250	150720	134020	145360	113540	128250	62300	60155	93465	69506	53441	63095	54859	35274	49992	24452	20499	33780
mws1077	355.1	193.05	354.095	C16H18O9	[M+H]+	Scopolin	Lignans and Coumarins	Coumarins	531-44-2	B	59613	64123	77684	70265	61537	82351	42604	68235	62839	140640	68194	82693	85548	74452	94043	148690	101160	100970	86621	65146	73560	79919	61235	56213	109490	101350	100930	92787	97258	98129
mws0748	353.09	191.1	354.095	C16H18O9	[M-H]-	1-Caffeoylquinic acid*	Phenolic acids	Phenolic acids	1241-87-8	A	282410	430460	290730	75005	36599	107620	39339	330360	190380	250590	252730	138240	853140	698140	825180	416790	164160	208570	61801	39548	330020	151430	159270	213570	279710	226510	211610	59925	75857	47195
pmp001283	355.28	337.27	354.277	C21H38O4	[M+H]+	Glyceryl linoleate	Lipids	Glycerol ester	26545-74-4	A	103480	139500	126140	133350	154560	164020	109940	48872	96363	95689	85133	99955	151190	206830	189460	117400	84854	115790	114210	211310	168440	61661	232100	161100	163050	125380	158210	68172	43029	52863
pmb0890	355.28	263.3	354.277	C21H38O4	[M+H]+	MAG(18:2)	Lipids	Glycerol ester	-	A	2014800	2865700	2132500	3684700	4280600	3876400	2900700	2356600	2673200	3026200	2210300	2429500	2383400	1773800	1715400	2433900	2020300	1943100	2591800	1948700	2106300	1161800	3434300	1890000	1974800	3022000	2382800	2080100	1676200	1529700
Zmhn002422	355.1	193.05	356.11	C16H20O9	[M-H]-	Feruloyl glucose	Phenolic acids	Phenolic acids	-	A	692900	722080	802400	754580	1190100	953940	787770	874230	849230	1006200	1051300	1010100	754450	748230	796960	797280	822610	771010	1006900	801220	945800	945510	1251700	1191700	1657100	1652800	1652000	949760	1323400	1234000
mws1526	359.13	197	358.126	C16H22O9	[M+H]+	Sweroside	Terpenoids	Sesquiterpenoids	14215-86-2	A	1454500	1054700	1457700	5776200	5360700	6361700	5833100	7704600	7540400	9012400	8730700	9276400	845990	754210	810350	2563500	2825500	3101400	4088400	3441800	4335100	3961800	4046700	4206100	587340	936630	806320	6159000	5637700	5698900
mws0097	357.13	151	358.142	C20H22O6	[M-H]-	Pinoresinol	Lignans and Coumarins	Lignans	487-36-5	B	13367	17569	14576	20244	25862	21395	24337	12272	15479	12685	6134.4	9895.8	14420	20133	17478	19514	17011	17061	15459	6536.4	11008	9221.8	12145	9196.2	21334	18621	20023	9763.5	5610.8	7288.4
pmb3107	359.1	182.1	360.106	C15H20O10	[M-H]-	Glucosyringic Acid	Phenolic acids	Phenolic acids	-	A	3581400	3203900	2876800	4133300	3932100	3846300	3915800	4576800	4306300	5082500	5104400	4801100	1960700	1965200	2076400	2596500	2714300	2604100	3082200	3288400	3153900	2973500	2884400	3025700	2855100	3191800	2912500	4579000	3408700	3827200
mws5040	365.11	203.05	364.078	C12H21O11Na	[M+H]+	Turanose	Others	Saccharides and Alcohols	547-25-1	A	4927300	3278800	3570500	990490	927810	726340	1543600	1700300	1857600	2043300	1678100	1556400	4191600	2454200	3789800	1282300	872790	1064000	1482500	1081000	1309600	1172800	1537900	1300100	2343600	2235800	1719300	1091300	2752000	1461600
pmb0964	366.2	204.1	365.17	C16H23N5O5	[M+H]+	Isopentenyladenine-7-N-glucoside	Nucleotides and derivatives	Nucleotides and derivatives	-	B	212940	120470	170350	45700	39630	34047	79376	105080	76771	82597	83837	82613	183330	144400	177360	51618	49515	51522	88789	67389	42247	66482	66086	69252	105170	105310	128550	61987	117090	81726
pma0104	369.12	207.1	368.09	C20H16O7	[M+H]+	N-sinapoylhydroxycoumarin	Lignans and Coumarins	Coumarins	-	B	232110	203900	162920	225500	203710	223180	429620	261090	320450	181980	215810	196460	196360	208130	213480	333650	330620	282400	281890	382040	322700	395600	363930	335270	252040	277260	253170	263940	214310	193880
pmb0752	369.12	177.1	368.111	C17H20O9	[M+H]+	3-O-Feruloyl quinic acid	Phenolic acids	Phenolic acids	1899-29-2	B	248470	221110	215370	196810	292670	344210	707660	877950	740700	530880	469050	581390	533610	669550	684560	993630	1640500	1401200	1229800	1103900	1062500	833890	596610	735990	373140	339050	372760	428970	558770	353530
mws0179	367.1	190.9	368.111	C17H20O9	[M-H]-	Chlorogenic acid methyl ester	Phenolic acids	Phenolic acids	29708-87-0	B	15273	19451	13939	25662	10326	25895	5133.2	3630.5	9	19864	4460.8	5396.6	63844	73128	69852	36243	12263	14551	14782	8436.4	32441	25873	31340	30472	59137	22085	47044	18316	43707	35892
Lmtn003598	367.14	205.08	368.147	C18H24O8	[M-H]-	3-Prenyl-4-O-β-D-glucopyranosyloxy-4-hydroxyl-benzoic acid	Phenolic acids	Phenolic acids	-	B	6835.6	6802.9	3280.7	845.19	665.64	1277.1	5216.5	9	9	9	9	1313.3	45638	70813	89994	18134	30156	19145	10911	15901	12787	17404	15912	19312	10572	18065	12967	3245.7	1422.3	9
pmn001695	371.1	249.06	372.106	C16H20O10	[M-H]-	Trihydroxycinnamoylquinic acid	Phenolic acids	Phenolic acids	-	B	15258000	14252000	15200000	14745000	14884000	15770000	14711000	15247000	14198000	18082000	16746000	16748000	13848000	14885000	15683000	16477000	15299000	18391000	16556000	16349000	17145000	16329000	17087000	16888000	17056000	17650000	17624000	16966000	20042000	19241000
Hmgn004693	371.11	327.03	372.121	C20H20O7	[M-H]-	(8'R,7'S)-(-)-8-Hydroxy-α-conidendrin	Lignans and Coumarins	Lignans	-	B	187140	201440	192220	106870	92350	98377	96861	65791	86641	75202	71481	75061	221330	289960	259560	131130	152430	142370	97905	92857	104170	122390	112460	119280	293110	215040	242750	108960	57511	69643
pmb0064	374.11	198.08	373.101	C15H19NO10	[M+H]+	DIMBOA glucoside	Alkaloids	Alkaloids	18607-79-9	B	642150	181780	479410	363370	343860	357420	262890	265060	255350	376240	314230	368360	442770	168710	323430	192540	206630	213360	294520	196960	279530	292500	437600	373680	479490	659140	550460	315180	1482900	958920
pmb0108	375.2	137.1	374.1	C19H18O8	[M+H]+	Feruloyl syringic acid	Phenolic acids	Phenolic acids	-	B	219390	312390	232190	131250	143610	137580	196950	148340	200560	83087	76312	87418	154030	173280	187680	101990	81257	93521	77714	77447	73858	74381	65430	74537	356940	292900	304980	129430	67944	98519
pmp000695	375.13	177.05	374.121	C16H22O10	[M+H]+	Swertiamarin	Terpenoids	Sesquiterpenoids	-	B	156860	175790	202380	123740	152310	172260	130250	138450	149840	113870	130460	147600	202290	208520	216920	205680	242240	215170	186600	216480	215400	233600	230600	202180	348240	314550	369270	133690	315410	121730
Hmgn004139	373.13	329.05	374.136	C20H22O7	[M-H]-	isohydroxymatairesinol	Lignans and Coumarins	Lignans	-	B	38343	31110	37257	85106	82848	79451	94287	52691	82655	67736	60783	59731	37724	37264	41812	79500	107880	97350	121210	103610	109970	78219	117150	84989	50261	44429	40979	78075	96960	86215
mws0232	377.15	243	376.138	C17H20N4O6	[M+H]+	Riboflavin	Others	Vitamin	83-88-5	A	1025300	1688500	1427900	677050	1071200	896990	1036800	1015400	1191200	949330	720400	816710	1452100	909780	1103100	904210	686650	786480	1016900	694030	1020300	561320	1014100	783550	1205600	1939400	1333700	760760	594100	679300
pmn001661	381.19	337.2	382.199	C20H30O7	[M-H]-	Cinncassiol C1	Phenolic acids	Phenolic acids	73613-35-1	B	399320	332870	462910	488530	482230	491120	571460	561470	567430	540830	650730	525390	182970	161320	216080	231700	248320	203400	281470	274570	240970	263140	280770	292560	292170	330300	293930	514170	384720	473840
pmc0304	384.12	252	383.108	C14H17N5O8	[M+H]+	Succinyladenosine	Nucleotides and derivatives	Nucleotides and derivatives	4542-23-8	B	218290	281240	293480	488130	356650	446860	235950	219130	254950	578810	222900	383520	309730	216650	249660	190490	181470	162210	222430	192980	200310	172230	416690	316830	2314000	894000	1547900	645000	1801000	1367800
pmn001318	383.11	219.06	384.121	C21H20O7	[M-H]-	1,3-O-Di-p-Coumaroyl glycerol	Phenolic acids	Phenolic acids	-	A	14066	23160	16219	1034300	1770200	1408700	871510	984240	946120	1414300	1621000	1515300	9074.2	7584	5850.5	311940	85510	196470	652150	331310	567270	660510	1023200	759830	659000	159360	406720	364580	565020	452110
pme1286	385.13	250	384.122	C14H20N6O5S	[M+H]+	S-(5'-Adenosy)-L-homocysteine	Amino acids and derivatives	Amino acids and derivatives	979-92-0	A	297850	336180	352950	158380	153600	182740	153320	148930	175570	125700	111290	132770	306340	368040	393020	182740	193520	221540	181930	165380	167630	166080	181640	181890	393410	366150	395590	174480	238510	200150
pmb3062	385.1	151.1	386.102	C17H22O10	[M-H]-	Eudesmoyl quinic acid	Phenolic acids	Phenolic acids	-	B	5329.2	6316.9	8181	19706	18428	15271	16885	13275	14472	20053	19321	9224.7	6567.1	9687.6	11490	14652	16318	12085	15713	9978.5	14198	17540	13516	14342	14447	14469	12862	20591	24814	23883
pmb2940	385.11	205	386.121	C17H22O10	[M-H]-	1-O-β-D-Glucopyranosyl sinapate	Phenolic acids	Phenolic acids	78185-48-5	B	2580900	2905800	2697400	789160	836450	770380	835710	590310	676490	563190	432000	543010	2410200	2950700	2929800	2406400	1268400	2019500	1325500	1320900	1238600	1507800	972050	1373300	3483800	3210600	3205900	1031100	150500	483150
Lmzn001582	387.17	207.1	388.174	C18H28O9	[M-H]-	5'-Glucopyranosyloxyjasmanic acid	Phenolic acids	Phenolic acids	-	B	808100	784780	900380	423120	486120	578600	794420	807990	840440	717020	634000	639110	1103800	966420	1028300	830490	945000	832730	659430	680870	624510	560440	554220	569230	1227300	800320	871280	803150	566670	572360
pmn001741	389.11	165.1	390.116	C16H22O11	[M-H]-	Oleoside	Terpenoids	Monoterpenoids	178600-68-5	B	47485	39777	51224	33084	30195	29170	22503	43880	34062	37057	37195	35712	25520	23265	25653	17587	16623	29198	12030	18272	17551	20548	13837	19701	77938	64801	61593	61972	43488	41901
HJN100	389.12	227.07	390.131	C20H22O8	[M-H]-	Piceid	Phenolic acids	Phenolic acids	65914-17-2	B	21295	32238	24125	5464.8	6004.2	6856.8	7349.2	7914.3	3414.2	7781.3	7645	6896.7	62235	60638	57461	28626	25794	26774	19062	18013	19507	17116	17111	19014	28632	26090	27742	8284.8	1840.2	6035
Lmhn002573	399.09	205.04	400.101	C17H20O11	[M-H]-	sinapoylglucuronic acid	Phenolic acids	Phenolic acids	-	B	1202400	1459700	1482300	1250600	1450200	1297900	2363200	1137400	1707000	1583100	1428100	1559700	1656200	1727100	1965800	2728000	2524700	2777200	3327600	2821000	3010400	2633400	2467200	2627000	817800	1034100	941480	1738200	636300	1099200
Hmbn005456	399.11	163.04	400.116	C21H20O8	[M-H]-	1-O-Caffeoyl-3-O-p-coumaroylglycerol	Phenolic acids	Phenolic acids	-	B	5750	12360	12147	265260	1080600	666850	1091900	221900	650630	329530	219320	279320	2863.3	2309.5	3630.5	62420	24274	46722	87777	79873	89605	176700	100060	138920	143830	62659	99352	96598	163340	129320
HJAP014	403.09	367.08	402.095	C20H18O9	[M+H]+	Apigenin-C-pentoside	Flavonoids	Flavonoid	-	B	48757	54756	53220	35141	21088	28645	29201	27517	34308	30327	25439	26955	100510	76738	98948	68729	59354	57805	61502	60530	69244	70598	55173	60653	43472	41861	50746	31989	29197	33249
mws0043	403.14	373.1	402.131	C21H22O8	[M+H]+	Nobiletin	Flavonoids	Flavonoid	478-01-3	A	344920	210960	293930	150610	150290	153530	112370	158190	136310	158400	168690	163700	217110	209340	211180	218730	200940	201910	103240	106850	107120	210420	146400	158820	215110	202430	206340	143220	188390	164250
pme3007	402.99	159	404.002	C9H14N2O12P2	[M-H]-	Uridine 5'-diphosphate	Nucleotides and derivatives	Nucleotides and derivatives	27821-45-0	B	22853	31599	32165	14170	12322	13838	9789.4	4746.5	7650.2	11817	10993	15036	15943	33247	25664	14599	12862	16030	13155	12132	11708	19042	10016	15030	25125	16854	23236	12250	19576	5241.2
pmb3031	403.1	313.1	404.111	C20H20O9	[M-H]-	Tricin O-glycerol	Flavonoids	Flavonoid	-	A	1669400	1895400	1889400	2615200	2374300	2635900	2536700	2178300	2504700	2194100	2295100	2439100	1601800	1785600	1921100	2443600	2058900	2281700	2520200	2344000	2524000	2231600	2130300	2195400	1795700	1743300	1677700	2349600	1539900	1904800
pmb0500	411.19	177.05	410.184	C23H26N2O5	[M+H]+	N-p-Coumaroyl-N'-feruloylputrescine	Alkaloids	Phenolamine	380302-96-5	A	364750	713100	564130	22348000	28061000	23638000	17043000	18523000	18929000	31674000	33021000	36432000	96858	157130	66546	4016200	1383300	2809300	16783000	8193300	14497000	9837800	18749000	15692000	11307000	5539100	8928600	17104000	18516000	17513000
Hmbn006063	413.12	193.05	414.131	C22H22O8	[M-H]-	1-O-Feruloyl-3-O-p-coumaroylglycerol	Phenolic acids	Phenolic acids	-	A	630320	1360100	931510	10711000	14310000	12139000	13632000	14517000	15862000	16712000	18632000	18282000	217100	288740	148120	7242200	3528600	5749900	15448000	10003000	13954000	10250000	13549000	13115000	4268300	3416900	3952400	7802500	8133900	7341900
Lmhn001773	416.06	179.03	415.054	C19H13NO10	[M-H]-	caffeoylnicotinoyltartaric acid	Phenolic acids	Phenolic acids	-	B	14941	20037	13515	6970	2621.9	4140.9	9	16390	5554.5	9651.7	2481.9	5547.7	41219	34552	23589	17589	8504.5	11592	9	9	14568	9800	6937.6	5455	7185.3	11787	8265.8	9	9	9
pmn001668	415.14	161	416.147	C21H20O9	[M-H]-	Apigenin-3-O-rhamnoside	Flavonoids	Flavonoid	-	A	59831	66776	49892	82067	66688	87022	83794	84674	67523	82329	82450	98774	820750	1003300	1018500	118410	683800	421800	140260	867200	419370	839150	1232700	1021500	116500	73638	110800	94645	191130	144250
Lmbp003668	419.1	287.05	418.09	C20H18O10	[M+H]+	Kaempferol-3-arabinopyranoside	Flavonoids	Flavonoid	-	B	259760	381880	101870	14373	16102	40225	23611	269480	162460	141170	8975.3	29348	483090	139850	134780	30077	149070	138600	71193	24819	174840	40472	9147.9	27522	99254	194570	251370	25836	77894	38297
mws2523	421.08	241.1	422.083	C12H23O14P	[M-H]-	Trehalose 6-phosphate	Others	Saccharides and Alcohols	4484-88-2	A	45564	38820	45859	24552	26299	27799	21461	22365	22486	26471	29999	29413	29991	41702	41838	21652	18065	20716	21949	17754	17515	23606	17296	23163	64536	32694	52246	25251	40833	36683
pmb0864	426.26	285.24	425.254	C19H40NO7P	[M+H]+	LysoPE 14:0	Lipids	LPE	-	B	69323	62549	68473	37487	28605	34117	34087	45770	45599	36576	26910	31637	39596	57667	41857	43228	35594	39051	25786	34858	29523	41977	29051	30184	65847	56633	62522	48756	59670	44889
mad1424	427.05	295.05	426.043	C17H14O13	[M+H]+	Ditartaroyl-hydroxylcoumarin	Phenolic acids	Phenolic acids	-	B	23671	36699	38149	53620	40807	29445	56642	25691	47678	38272	31336	32619	106060	100260	123350	86534	85317	111070	91505	66372	90566	73689	101160	90852	38860	32105	40900	42348	55545	49334
pme2117	426	159	427.029	C10H15N5O10P2	[M-H]-	Adenosine 5'-Diphosphate	Nucleotides and derivatives	Nucleotides and derivatives	58-64-0	B	74862	90856	96027	39940	38350	47705	27965	24332	29984	59769	50340	54482	57955	126170	92864	58711	51364	47777	44661	49604	52180	48092	44450	54572	76722	70809	94610	41879	23626	23981
Cmbn007148	429.12	429.12	430.126	C22H22O9	[M-H]-	1-O-Feruloyl-3-O-caffeoylglycerol	Lipids	Glycerol ester	-	B	9095.7	14607	13192	105570	315240	202880	257440	127540	183740	142240	109740	119910	9	9	9	35219	21656	38960	75798	48935	91172	78630	97247	88392	73669	44443	60290	85000	112940	77809
Lmlp003201	433.11	283.06	432.105	C21H20O10	[M+H]+	5,7,4'-Trihydroxy-8-C-β-D-glucopyranosylflavone	Flavonoids	Flavonoid carbonoside	-	A	20401000	17373000	19595000	11341000	15047000	12498000	4712400	5992200	5087000	9954200	8839300	10046000	26029000	26143000	28191000	19924000	17032000	19867000	11344000	13821000	11698000	13126000	8676400	10958000	25000000	16672000	20336000	8053600	12644000	9354900
mws0048	431.1	311	432.106	C21H20O10	[M-H]-	Apigenin-8-C-Glucoside (Vitexin)*	Flavonoids	Flavonoid carbonoside	3681-93-4	A	14793000	12494000	15375000	6778000	8968100	8661600	2865600	3947500	3520200	4890900	5601400	5596500	19249000	20627000	20417000	13825000	10917000	12979000	6644300	8355100	7542300	7967000	5726300	7446800	20585000	11502000	14439000	4125700	6081000	5534800
mws1434	431.1	311	432.106	C21H20O10	[M-H]-	Apigenin-6-C-glucoside (Isovitexin)*	Flavonoids	Flavonoid carbonoside	29702-25-8	A	11303000	9205900	11152000	4573200	6771800	5545200	2123100	2645700	2215400	4485500	4401000	3878100	16171000	15504000	14861000	10591000	7735400	10128000	5161400	6987200	6087100	6691500	4072100	5429800	12006000	8033000	10766000	3236000	4517700	3636500
pmp000117	433.15	418.1	432.142	C22H24O9	[M+H]+	3,5,6,7,8,3',4'-Heptamethoxyflavone	Flavonoids	Flavonols	1178-24-1	B	18439	17163	20938	15819	17547	17902	18032	19389	19392	16176	14874	19527	21853	18932	20952	19379	17875	17777	18924	18976	18006	18556	14674	20696	20718	20542	21712	23010	26158	24306
mws4183	433.08	300.03	434.085	C20H18O11	[M-H]-	Quercetin-3-O-α-L-arabinopyranoside(guaijaverin)	Flavonoids	Flavonols	22255-13-6	A	95624	143210	49858	6168.2	12685	27563	7186.6	152260	77819	61717	2854.4	16431	238680	69429	83058	21757	81086	37310	36709	12515	183680	12154	8790.5	12125	64020	96913	65310	19736	37425	26632
pmb0744	435.11	331.08	434.1	C24H18O8	[M+H]+	Tricin O-phenylformic acid	Flavonoids	Flavonoid	-	A	975480	1107200	1186000	780930	701300	743090	881130	728670	860310	638220	681020	691820	1072000	1207600	1290300	997080	821010	984120	826500	830830	874730	867280	682270	878230	747180	886700	818010	769870	361760	541460
pmb0503	439.22	147.04	438.211	C20H30N4O7	[M+H]+	N-(4'-O-glycosyl)-p-coumaroyl agmatine	Alkaloids	Phenolamine	-	B	27523	28281	31601	13933	30532	23011	21282	11818	18020	25210	33088	27150	39575	49104	44325	19284	21720	29824	28946	12345	18950	28325	32521	23951	38040	36960	27577	17911	40181	29054
Lmhp005550	441.2	177.05	440.195	C24H28N2O6	[M+H]+	N,N'-Diferuloylputrescine	Alkaloids	Phenolamine	42369-86-8	B	688330	1192500	1017700	13902000	18606000	15512000	13155000	18589000	16983000	22057000	23178000	24084000	209580	147770	109830	5269300	2343100	3910400	19310000	10985000	18295000	10160000	18898000	14740000	7421800	8659000	7803300	12358000	15590000	13833000
pmp000091	445.15	177.05	444.142	C23H24O9	[M+H]+	Glyceryl 1,3-diferulate	Phenolic acids	Phenolic acids	83008-46-2	A	332570	492590	370380	3207100	4563600	3412100	3824700	4255700	4869300	5002500	6856400	6817100	74899	65637	50935	1786800	978910	1295500	4878100	2897200	3841200	2638000	4300000	3414000	1454300	938190	1206600	2666100	2653200	2551200
pme1014	445.3	341.3	444.303	C31H40O2	[M+H]+	Menaquinone (K2)	Others	Vitamin	11032-49-8	B	90775	99658	98359	85752	92650	83675	88968	86986	89580	91392	75039	105770	103060	94777	103580	87804	87025	96086	92472	94473	89580	131140	81550	89127	88401	95839	79452	75300	94409	96108
pmb1283	448.1	163.5	447.215	C18H33N5O6S	[M+H]+	L-Glutaminyl-L-valyl-L-valyl-L-cysteine	Amino acids and derivatives	Amino acids and derivatives	-	B	108020	88650	104470	625400	514870	659280	364140	399060	484970	843030	672420	866910	76275	68806	64696	389770	202420	352530	386140	356130	457720	478400	444890	481070	77793	75499	90065	702620	490740	547820
Lmhp007836	448.25	307.23	447.239	C21H38NO7P	[M+H]+	LysoPE 16:3	Lipids	LPE	-	B	2194.8	3629	2839.3	31274	31906	31404	13861	13133	15699	18069	19497	20395	5975.5	2376.6	3439.3	5763.5	5652.5	6987.5	9453.7	7599.3	8520.1	3471.3	16763	7919.4	1487.2	3971.1	2560	18835	8549.2	11211
mws0045	449.11	303.05	448.101	C21H20O11	[M+H]+	Quercetin-3-O-α-L-rhamnoside(Quercitrin )	Flavonoids	Flavonols	522-12-3	B	185330	199560	90922	10794	14962	56654	21645	244530	121100	75507	11863	22688	407220	89782	132140	34683	132500	67858	66563	20323	235630	19017	7440.1	13345	95387	162900	116320	18245	44479	26596
mws0089	447.09	285.04	448.101	C21H20O11	[M-H]-	Kaempferol-7-O-glucoside	Flavonoids	Flavonols	16290-07-6	B	9	9	9	37525	15535	30811	31937	46045	23098	70309	161640	132080	32046	46005	58210	27750	9	9	9	7032.9	9	48019	107930	86587	9	9	9	22393	24770	15841
mws1299	449.11	299.2	448.101	C21H20O11	[M+H]+	Luteolin-8-C-Glucoside (Orientin)	Flavonoids	Flavonoid carbonoside	28608-75-5	A	4507800	6037600	4882200	5073600	5310200	4970900	2401600	1147000	1593000	3296600	3557500	3460000	10875000	10501000	11431000	9445100	8881000	8706200	6477700	7310200	6826400	7253100	6877300	6986700	5602400	6584900	6064600	4309700	2997400	3278600
Lmhp009034	452.28	311.26	451.27	C21H42NO7P	[M+H]+	LysoPE 16:1	Lipids	LPE	-	B	25554	34357	37694	25682	99200	31668	75901	22559	34349	54274	61312	48100	29300	21202	25988	29109	21675	21708	34845	28581	29532	25234	37754	28940	28558	33051	34763	30915	27558	20982
HJN093	451.09	313.05	452.095	C20H20O12	[M-H]-	Salicylyl-galloyl-glucose	Phenolic acids	Phenolic acids	-	B	20344	32610	21464	16720	9643.6	10146	10988	9781.9	8545	7477.5	11009	14849	11741	10936	15421	2975	2926.4	15424	4702.8	5633.1	9861.4	6843.9	5085.3	7146.6	24646	33127	23281	13593	7877.6	5914.9
pmb0876	454.29	313.27	453.286	C21H44NO7P	[M+H]+	LysoPE 16:0	Lipids	LPE	53862-35-4	A	4539600	4762100	4274900	4280700	3110600	3940400	3300400	3659300	3437000	2690500	2217500	2284600	3037500	3198600	3207300	3543700	3033600	3226800	3367800	3784800	3297300	3112400	3162400	3065000	4477400	3825600	4118200	3628800	6084700	4771300
pmb0478	455.15	147.4	454.148	C21H26O11	[M+H]+	Coumarin O-rutinoside	Phenolic acids	Phenolic acids	-	B	14145	10615	13629	8007.5	18158	11165	17800	7005.8	12833	13791	5069.3	13617	11009	17610	18040	7372.2	14862	14695	11268	8642.1	8779.8	7935.4	21190	12938	337530	122120	252040	12939	378240	220600
pmb0464	458.1	116.3	457.143	C16H27NO14	[M+H]+	Aspartic acid di-O-glucoside	Amino acids and derivatives	Amino acids and derivatives	-	B	2225000	2824900	3258000	6824300	3978800	6525600	2839400	5585000	4993100	2065000	1059600	1569700	1824200	1362900	1781200	1325600	898360	1206500	5942400	3936900	4688500	907560	5007100	3071300	20982000	23335000	21149000	9769900	19611000	15811000
pmb2654	460.1	117.9	461.153	C19H27NO12	[M-H]-	Anthranilate O-hexosyl-O-hexoside	Phenolic acids	Phenolic acids	-	B	62481	62750	52978	68317	74496	48711	45220	67229	45355	47013	48995	81360	48116	65716	91017	40251	35335	46974	39013	61591	40966	38702	43617	21756	150420	62198	89457	66388	39188	31471
pmp000120	463.12	427.1	462.116	C22H22O11	[M+H]+	Diosmetin-6-C-glucoside	Flavonoids	Flavonoid	-	A	13214000	13552000	13889000	11585000	13181000	11688000	5640000	4006100	4694100	9884300	9795500	10159000	17508000	16680000	19084000	14149000	12754000	14282000	10765000	12180000	11831000	12302000	12259000	12049000	12574000	16416000	13785000	12498000	9519400	10699000
pmp000579	463.12	301.07	462.116	C22H22O11	[M+H]+	Diosmetin-7-O-galactoside	Flavonoids	Flavonoid	-	A	1777300	2780000	2231500	753730	902110	790860	783450	660700	770940	634130	663440	692280	5843400	5159000	5967500	3228500	3107600	3146700	2266100	2670400	2467500	2989900	2355900	2917200	2457800	2052900	2267900	993350	578720	713540
Lmnp002845	463.13	343.09	462.116	C22H22O11	[M+H]+	5,7,4'-trihydroxy-6-methoxyflavone-8-C-β-D-glucoside	Flavonoids	Flavonoid carbonoside	-	A	18340000	19647000	20439000	17088000	18402000	16216000	8207600	5881400	7032900	15672000	13793000	15187000	22832000	24106000	26768000	19214000	17218000	19589000	15749000	18223000	16191000	18119000	16874000	17665000	18780000	23094000	20475000	17799000	15480000	16030000
pmp000233	463.12	313.07	462.116	C22H22O11	[M+H]+	Swertiajaponin	Flavonoids	Flavonoid carbonoside	6980-25-2	B	1053700	1350800	1150700	1683100	1031400	1212500	639970	885860	888010	1072700	1306500	1436600	1069400	993860	1525000	800830	833120	1263900	1019900	1035700	1459800	914070	819260	1301500	1196700	1399600	1019000	1186400	1131300	1574800
pmb3012	461.11	299.2	462.116	C22H22O11	[M-H]-	Chrysoeriol-7-O-glucoside	Flavonoids	Flavonoid	-	A	72974	93522	107530	44944	48133	34837	33868	33189	34463	35792	37237	24353	233090	227420	214710	150850	150080	133540	89540	101720	103100	107530	112000	116550	97714	88297	67378	46428	27636	32807
mws1329	463.09	300.7	464.095	C21H20O12	[M-H]-	Quercetin-7-O-Glucoside*	Flavonoids	Flavonols	491-50-9	A	128960	138430	74948	39265	41031	66768	54131	141570	110790	80258	84312	31106	269960	341060	135220	391880	103000	65311	62624	54983	172320	36581	45091	37991	69493	117920	62987	38860	42588	28591
mws0091	463.09	300.03	464.095	C21H20O12	[M-H]-	Quercetin-3-O-β-D-glucoside(Isoquercitrin)*	Flavonoids	Flavonols	482-35-9	A	292300	299990	196810	52882	70288	155240	97054	256880	221490	151450	131720	82139	621060	565350	245150	589460	200410	141100	101690	100360	325050	66585	66419	92243	232660	253930	95051	74384	99557	92104
pmb2957	465.08	285.04	467.098	C24H19O10+	[M-2H]-	Cyanidin-O-syringic acid	Flavonoids	Anthocyanins	-	B	33348	31655	33526	45375	44614	45495	50444	44733	53427	49543	55179	45905	35714	36184	35703	40442	54118	47884	54725	50676	53712	59779	80931	65638	38949	28728	27208	48352	47061	40604
pmd0130	468.31	184.07	467.301	C22H46NO7P	[M+H]+	LysoPC 14:0(2n isomer)	Lipids	LPC	-	A	41185	51109	46394	216510	177290	193740	103530	114910	99229	167870	191380	188350	60469	84542	40155	150600	45792	47957	64608	75277	66430	32312	121400	63950	62749	88358	77517	110800	170240	133750
pmb1912	474.17	327	473.166	C20H23N7O7	[M+H]+	10-Formyl-THF	Alkaloids	Alkaloids	2800-34-2	A	1083200	1296400	1314800	1193100	1141300	1283800	2609000	1436800	2074300	1146400	1270500	1313200	1262800	1449200	1582500	1634000	2098000	2176200	1237400	1436300	1296000	1554800	1404200	1472400	1194500	1181700	1099100	1728900	1179200	1490000
Lmhp008233	474.26	333.24	473.254	C23H40NO7P	[M+H]+	LysoPE 18:4	Lipids	LPE	-	B	8247.2	16381	12030	78834	75444	81639	55940	47656	53449	74919	73409	76959	20336	6805.2	13264	34547	22928	25328	57791	58347	53088	15987	69878	42797	9326.5	22860	15746	47986	36592	38728
pmp000581	475.12	271.06	474.116	C23H22O11	[M+H]+	Apigenin-7-O-(6'-O-acetyl)-β-D-glucoside	Flavonoids	Flavonoid	-	B	11047	6609.8	10502	7692.7	7390.9	6790.8	5464.3	2819.7	5211.7	9399.3	87753	11340	8537.6	197360	10170	476430	2934.7	7248.4	12424	9119.1	26690	24191	16796	17774	16980	5604.5	9776.6	5681.4	35781	19902
Lmhp008801	476.28	335.26	475.27	C23H42NO7P	[M+H]+	LysoPE 18:3	Lipids	LPE	-	B	52752	62355	59432	88477	69794	90911	70282	40256	58213	60467	66092	82793	53528	45424	52698	51672	46505	61578	69310	82905	92923	49626	70361	45383	77631	74098	90107	66207	64179	81292
Lmhp008589	476.28	335.26	475.27	C23H42NO7P	[M+H]+	LysoPE 18:3(2n isomer)	Lipids	LPE	-	B	1099200	1845700	1323400	3795900	3690600	3806400	2903900	2735100	2644200	3782200	3838100	3692500	1808300	792650	1234100	1858300	1532900	1642400	2743900	2774200	2699300	1251000	3559400	2253700	1249200	1988400	1674900	2896500	2144800	2234600
pmb0545	477.14	315.09	477.14	C23H25O11+	[M]+	Rosinidin O-hexoside	Flavonoids	Anthocyanins	-	B	8155.5	14775	13283	136620	125500	125000	120330	53313	90534	119210	92848	107080	38381	9750.3	20142	150180	137740	142860	145970	175320	166700	170430	120890	151490	18869	26793	23433	117500	54620	73775
pmb0874	478.29	337.27	477.286	C23H44NO7P	[M+H]+	LysoPE 18:2(2n isomer)	Lipids	LPE	-	A	1633600	2442600	1961300	4088800	3981100	4159900	3240500	3255200	2911500	3923900	4047600	3827200	2358100	1097100	1669700	2138500	1895900	1932300	2753600	2865400	2843500	1231600	3507200	2175300	1479900	3000200	2308100	2884500	1998500	2411200
pmb0881	478.29	337.27	477.286	C23H44NO7P	[M+H]+	LysoPE 18:2	Lipids	LPE	-	A	1914700	2740500	2257700	4635700	4499500	4690600	3504600	3621600	3409500	4354200	4301100	4463100	2577800	1354600	1931600	2424800	2053300	2316100	3082100	3110400	3212200	1402700	4001500	2487800	1668700	3296700	2511400	3291000	2345400	2712400
Hmpp003242	479.11	317.06	478.101	C22H22O12	[M+H]+	Isorhamnetin-3-O-glucoside	Flavonoids	Flavonols	-	B	182980	219090	206010	137450	143760	154020	224820	126650	180150	110320	127790	112820	165920	243380	180360	267560	161510	175050	136010	148760	148480	131340	120390	159300	123980	176770	148770	136390	50362	81768
pme3391	479.12	317.07	479.119	C22H23O12+	[M]+	Petunidin-3-O-glucoside	Flavonoids	Anthocyanins	6988-81-4	B	26295	22155	15860	14197	19157	26896	65951	11682	45055	18564	24616	22145	64318	71876	88696	108760	119560	90591	159740	125600	142860	129130	169750	150670	13356	24422	23435	45040	13988	23820
mws0289	480.31	339.29	479.301	C23H46NO7P	[M+H]+	LysoPE 18:1	Lipids	LPE	89576-29-4	A	484650	583390	373260	332520	388470	469860	185490	425370	441440	311820	315670	407170	239040	303660	292780	322560	214450	286750	314200	262550	236390	199260	458620	324000	646730	551820	660290	217630	604450	553420
pmb0856	480.31	339.29	479.301	C23H46NO7P	[M+H]+	LysoPE 18:1(2n isomer)	Lipids	LPE	-	A	4205000	6319500	4937200	16767000	13577000	15729000	10806000	13977000	11980000	16601000	18027000	17301000	3308400	2136000	2689300	4692000	3914900	4184500	8317400	7897600	7694900	2862700	9352100	5556300	4563300	8058100	6639400	11299000	12224000	11444000
Hmln001933	479.08	316.02	480.09	C21H20O13	[M-H]-	Myricetin-3-O-galactoside	Flavonoids	Flavonols	15648-86-9	B	31798	56106	28426	2862.3	7290.9	19294	2882.1	101340	74951	43637	9297.1	14692	181930	27010	61205	25203	54175	24107	25536	6600.3	75073	6115.1	1725.4	3863.9	29403	41532	20554	8624.6	17253	14408
pmb0880	482.32	341.31	481.317	C23H48NO7P	[M+H]+	LysoPE 18:0(2n isomer)	Lipids	LPE	-	B	24597	35355	28002	107040	84467	99093	65133	89479	75160	112190	117410	110070	17581	12649	16082	29420	22414	25046	53144	52696	47586	17995	59561	36313	28650	49248	34986	68236	79066	67782
pmb3066	481.14	319.2	482.142	C22H26O12	[M-H]-	5-O-p-Coumaroyl shikimic acid O-hexoside	Phenolic acids	Phenolic acids	-	A	66151	47824	49914	60415	44087	59317	87269	48666	61319	45755	59034	54666	41046	46369	42626	55079	55723	56834	54733	63746	55722	79902	59317	47971	49750	46876	39680	47746	39321	38284
Lmhn002895	487.09	193.06	488.095	C23H20O12	[M-H]-	feruloylcaffeoyltartaric acid	Phenolic acids	Phenolic acids	-	B	6248.8	5685.6	5701	55143	43476	57998	35009	19019	24527	57567	31962	57837	5416.5	6239.7	3912.9	21206	13263	18494	30952	24676	29350	40053	51967	41456	8602	11201	4834.5	33904	25636	33509
pmn001712	549.22	489.2	490.177	C22H34O12	[M+CH3COOH-H]-	3-Hydroxy-4-isopropylbenzylalcohol 3-glucoside-glucoside	Phenolic acids	Phenolic acids	-	B	528310	456790	406390	465530	716100	567830	792280	557290	713910	548140	462320	580560	1092600	1172500	1105300	1214400	1407600	1295300	1379500	1291200	1307100	1227000	1210800	1232400	694000	575450	658080	839680	515930	571060
pmb0863	492.31	184.07	491.301	C24H46NO7P	[M+H]+	LysoPC 16:2(2n isomer)	Lipids	LPC	-	A	133550	248690	176530	783540	787730	802810	542240	418280	469300	728060	749840	736080	349540	140770	235880	349280	305460	311800	358250	447660	398550	155560	656010	344400	153570	319060	219720	417280	221070	298460
pmb0736	493.13	331	492.127	C23H24O12	[M+H]+	Tricin 7-O-Glucoside*	Flavonoids	Flavonoid	32769-01-0	A	1412400	1500700	1513200	765130	665740	760330	907770	979310	977970	723650	691800	816810	1843400	1893600	2064800	1255900	1403200	1326500	1211300	1305200	1221200	1148800	1199600	1273800	1185300	1281100	1156900	782480	604590	675160
pmb3042	491.12	329.1	492.127	C23H24O12	[M-H]-	Tricin 5-O-Glucoside*	Flavonoids	Flavonoid	32769-00-9	B	2823400	3450800	3110000	1911200	1794500	1923600	1428300	3199000	2295600	1647200	1919200	1940600	478420	401590	506840	604620	582060	737670	695050	794120	727800	766050	754910	725360	2941100	2834600	3065200	1728700	1547600	1620200
pme0444	493.13	331.08	493.135	C23H25O12+	[M]+	Malvidin-3-O-glucoside (Oenin)	Flavonoids	Anthocyanins	18470-06-9	B	159630	104310	134010	78644	103060	152810	82143	184630	88781	112450	185290	177640	17776	16916	23456	25802	45573	31719	32866	32042	22449	27742	19494	29295	95637	105050	68889	235770	129020	164970
pmp001270	494.32	184.07	493.317	C24H48NO7P	[M+H]+	LysoPC 16:1	Lipids	LPC	-	A	1677300	3231700	2339100	11943000	11320000	11766000	10054000	8105800	9001400	13534000	13692000	15088000	3076100	1417700	2197500	3687000	2831000	3717300	5231900	6667100	5784400	1955600	8287300	4098100	2028100	4632100	3187600	8070000	4592000	5268900
pmd0132	496.34	184.07	495.332	C24H50NO7P	[M+H]+	LysoPC 16:0(2n isomer)	Lipids	LPC	-	A	1587000	2391800	1986000	7890300	7071800	7675400	4478300	3648200	3908500	4295400	3968200	4202300	2258200	1633300	1880700	3545400	2498400	2857100	4187700	3595700	3849200	1327700	5947700	3138800	5104500	4547700	4723600	5076600	12003000	8910200
pmb0855	496.34	184.07	495.332	C24H50NO7P	[M+H]+	LysoPC 16:0	Lipids	LPC	17364-16-8	A	28531000	27026000	29071000	36356000	28804000	33923000	31666000	33230000	31267000	24944000	23290000	24570000	23625000	23325000	23588000	29022000	23744000	25209000	27956000	31017000	29484000	27109000	33883000	29288000	39174000	31566000	35868000	37374000	59402000	49830000
pmb0745	497.14	331.3	496.137	C26H24O10	[M+H]+	Tricin 4'-O-syringyl alcohol	Flavonoids	Flavonoid	-	A	5170600	6392500	6248800	6883900	5402500	5577500	8917800	7420000	8656900	6711500	6087100	7402500	4373600	5068500	5541200	5790700	4952200	6413600	6304000	5812800	6727800	5720500	5395900	5892100	4565600	5465400	5129900	6828800	3693000	5527800
Lmhp008688	500.28	359.26	499.27	C25H42NO7P	[M+H]+	LysoPE 20:5	Lipids	LPE	-	B	7057.6	10158	7182.8	17183	15049	20949	12629	13194	15368	18109	18271	19507	10070	4503.1	7388.8	12158	8692.2	9858.2	14917	15796	16120	7963	18989	11504	7803.3	9669.1	8843.5	16497	13367	14097
Lmhp009497	502.29	361.27	501.286	C25H44NO7P	[M+H]+	LysoPE 20:4	Lipids	LPE	-	B	7893.4	11855	9425.5	17562	16267	17446	12990	11552	17773	13411	14610	12935	11876	6356.1	7872.5	10363	9443.7	10176	12332	14410	13742	7824.1	14760	8825.1	8265.4	11979	9632.7	13789	12503	9728.1
Lmhp010040	504.31	363.29	503.301	C25H46NO7P	[M+H]+	LysoPE 20:3	Lipids	LPE	-	B	68890	70543	68842	60698	50677	60148	60138	60770	71070	50144	49770	54341	42187	51268	51040	51880	44397	49954	54610	65222	50837	53586	48561	55496	66108	66331	63738	56046	64170	64658
Lmhp010757	506.32	365.31	505.317	C25H48NO7P	[M+H]+	LysoPE 20:2	Lipids	LPE	-	B	86345	87409	88470	52588	50956	55682	51414	47490	43451	40125	35170	35196	67245	70055	67994	44877	42508	39827	34107	42079	36557	38969	38889	37390	84721	70434	78122	50934	47906	51498
pmb1466	511.12	331.1	510.116	C26H22O11	[M+H]+	Tricin 4'-O-syringic acid	Flavonoids	Flavonoid	-	A	184970	231610	224340	131030	117650	117300	158090	139510	163950	119930	111970	130680	134580	142730	169730	116990	138390	143870	116810	120740	128610	128140	111790	127180	165120	192740	183810	215110	73600	126130
Lmhp009773	515.32	261.22	514.314	C27H46O9	[M+H]+	1-α-Linolenoyl-glycerol-glucoside	Lipids	Glycerol ester	-	B	176630	317400	349280	393130	493440	479930	319000	123180	232240	228910	268800	290650	263690	423370	538680	264690	305770	379810	289350	412010	333040	175510	523940	443470	334300	428740	497060	190610	90794	191530
Hmqp006235	516.3	184.07	515.297	C21H46N3O9P	[M+H]+	LysoPC 18:4	Lipids	LPC	-	A	96321	155540	135310	827520	878880	892460	614160	456440	528210	696070	687570	745330	272280	94783	186030	335640	280180	302930	545340	575080	576890	161980	751190	390150	102510	221720	155260	475410	308840	360690
pmf0424	517.13	163.1	516.127	C25H24O12	[M+H]+	Isochlorogenic acid B	Phenolic acids	Phenolic acids	14534-61-3	B	27503	26509	32215	48200	34177	51313	39302	69125	43541	46518	101880	45445	16213	191670	8663.2	325870	20019	27179	27483	27928	51513	28215	36269	24258	23556	18762	17108	35078	44939	36728
Zmhn00785	515.16	341.11	516.169	C19H32O16	[M-H]-	Di-O-Glucose-quinic acid	Phenolic acids	Phenolic acids	-	B	469930	432400	489850	72704	73634	64397	119580	176800	148070	171300	145400	127690	406100	473950	341990	123060	85328	129810	93704	87844	99773	89178	54804	110930	521600	514980	514860	131890	106830	93504
Lmhp010573	517.34	263.24	516.33	C27H48O9	[M+H]+	1-Linoleoylglycerol-glucoside	Lipids	Glycerol ester	-	B	17715	19588	20470	15960	23501	30586	15000	8791.7	12195	9572.8	16807	14241	31620	26338	27795	19021	13379	17103	24369	26908	30178	7184.6	35784	20931	25185	20426	23633	12394	7069.7	7781.5
pmb0854	518.32	184.07	517.317	C26H48NO7P	[M+H]+	LysoPC 18:3	Lipids	LPC	-	A	43247000	43207000	43168000	63923000	63798000	64450000	55978000	53294000	51324000	59598000	53336000	57451000	45856000	45252000	43027000	47366000	44660000	47992000	51116000	57113000	55472000	44864000	60186000	47899000	45991000	46091000	47301000	56693000	47543000	51970000
pmb0865	518.32	184.07	517.317	C26H48NO7P	[M+H]+	LysoPC 18:3(2n isomer)	Lipids	LPC	-	A	1807000	2710100	2287900	6180000	5954700	6266500	4845700	4292300	4602100	5654500	5323000	5662600	3158200	1610600	2483100	3413400	2844900	3153100	4475200	4771100	4658200	2034100	5536000	3594100	2130400	3341300	2793400	4625800	3720000	3861600
pmp000585	519.11	433.11	518.106	C24H22O13	[M+H]+	Apigenin-7-O-(6-O-Malonyl Glucoside)	Flavonoids	Flavonoid	-	B	18558	21949	22932	23474	25406	19837	16384	25474	20448	20945	112540	20533	18001	264760	20145	520270	22214	29868	32252	33479	64796	35672	31562	35324	18146	15214	17255	14923	31198	20014
Hmbn002692	517.16	175.04	518.164	C22H30O14	[M-H]-	6'-O-feruloylsucrose	Phenolic acids	Phenolic acids	118230-77-6	B	302120	296400	273540	325620	277480	317050	221270	287010	224600	442540	446080	483860	434250	373760	475300	304610	315840	351130	234270	300930	290720	457420	421960	402970	255510	237370	263200	351180	358910	364720
pmp001251	520.34	184.07	519.332	C26H50NO7P	[M+H]+	LysoPC 18:2(isomer)	Lipids	LPC	-	A	2273200	3368600	2772300	4401600	4385000	4382400	3968000	3566300	3718200	4426400	4360900	4563200	3851700	2182300	3006000	2946100	2737500	2819000	3072700	3793100	3315600	1578200	4477900	3125800	2422900	3650900	3024800	3360700	2359500	2750100
pmp001273	520.34	184.07	519.332	C26H50NO7P	[M+H]+	LysoPC 18:2	Lipids	LPC	-	A	3131600	4372300	4852700	4969200	3689100	4299800	3125900	3137000	1810100	4101300	3921000	3549500	3117300	3984600	4007500	2831900	2496700	4340800	2923700	4071300	4162400	1584900	5736300	3580600	5800000	5297400	5333400	2259100	4515700	3498500
pmn001378	519.19	357.14	520.194	C26H32O11	[M-H]-	Terpineol monO-glucoside	Lignans and Coumarins	Lignans	-	B	108610	122020	145090	32617	31737	22010	51744	25829	30685	23279	22682	31727	113350	168490	150470	72635	48246	46570	18415	33909	39867	40844	31444	36808	162470	150520	168350	38034	25204	21816
Lmhp010190	522.36	184.07	521.348	C26H52NO7P	[M+H]+	LysoPC 18:1(2n isomer)	Lipids	LPC	-	B	794000	1174700	976720	1834600	1834700	1734600	1490200	1627700	1574600	1890100	2059600	2092700	876630	625840	806050	792290	634640	709440	1049300	1145700	1098300	411480	1410800	868570	1112700	1504600	1316900	1488700	1255100	1230800
pmp001281	522.36	184.07	521.348	C26H52NO7P	[M+H]+	LysoPC 18:1	Lipids	LPC	-	A	813350	1227700	972340	1910000	1871900	1890700	1623600	1683200	1736900	1985000	2031000	2202700	944450	660780	814890	807790	637310	723670	1114500	1233100	1140800	407340	1415400	879310	1180800	1589000	1327200	1540400	1322400	1340500
pmb3041	521.09	329.2	522.101	C23H22O14	[M-H]-	Tricin O-saccharic acid	Flavonoids	Flavonoid	-	B	446870	623360	579870	289680	282840	294110	396310	263210	366760	213230	236030	227100	391250	483620	493480	321380	267200	322460	191560	259540	238940	228230	215850	260040	775130	693510	673200	321880	176340	266330
pmn001710	521.13	359.08	522.137	C24H26O13	[M-H]-	Rosmarinyl Glucoside	Phenolic acids	Phenolic acids	-	B	259480	224140	244720	152970	213520	183460	278440	202800	247530	140810	160530	169200	315340	278670	308190	238550	300190	267840	371200	400810	386720	319510	325250	382800	238940	298550	240770	179610	158480	195750
mws0126	524.37	184.07	523.364	C26H54NO7P	[M+H]+	LysoPC 18:0	Lipids	LPC	19420-57-6	A	278000	324490	293070	755820	439180	611210	379000	463450	383870	358320	329000	344200	277690	283120	288870	399910	268430	300150	285400	318950	271800	285360	379990	322880	927050	473580	743280	719050	1926300	1244800
pmd0136	524.37	184.07	523.364	C26H54NO7P	[M+H]+	LysoPC 18:0(2n isomer)	Lipids	LPC	-	A	77176	109440	92710	288460	218480	281980	90374	115520	96157	128720	158570	153030	106920	56675	73511	155670	69645	101660	117360	129950	91476	42980	155160	100300	217290	185160	195660	187120	438540	304440
pmb3053	523.12	329.2	524.132	C27H24O11	[M-H]-	Tricin O-eudesmic acid	Flavonoids	Flavonoid	-	A	1921800	2192500	2043200	2320400	1919500	2107500	3137500	2193200	2649200	1968600	2013800	2214700	2074100	2460400	2564900	2788800	2523700	2733700	2529600	2431000	2667700	2586400	2255400	2647000	1694400	1835700	1645900	2102400	1261900	1643000
Lmtn003096	523.21	361.14	524.226	C26H36O11	[M-H]-	(-)-secoisolariciresinol 4-O-β-D-giucopyranoside	Lignans and Coumarins	Lignans	-	B	52654	86175	74558	62566	58800	66719	75266	61638	64852	42478	59967	46924	50662	59452	65260	44379	55535	37543	46266	38368	43331	50535	54876	47051	111960	69612	109340	41810	50289	53807
pmp000235	527.15	331.08	526.148	C27H26O11	[M+H]+	Salcolin B	Flavonoids	Flavonoid	-	A	11222000	13520000	14282000	12814000	8954200	9612600	17317000	10694000	13312000	8178300	6021300	8144900	10654000	12681000	13538000	13828000	11251000	12952000	10853000	12334000	13039000	13039000	10536000	12884000	12475000	11718000	12510000	11228000	5865600	8643600
pmb0717	527.15	331	526.148	C27H26O11	[M+H]+	Tricin 5-O-β-guaiacylglycerol*	Flavonoids	Flavonoid	-	A	553900	525490	743530	345650	364470	369210	203200	564270	246340	466470	332120	548220	22715	23452	20774	15202	27273	19488	25195	19929	19301	22470	26518	19301	540690	489190	549810	540320	310960	344280
pmp000234	527.15	331.08	526.148	C27H26O11	[M+H]+	Salcolin A	Flavonoids	Flavonoid	-	A	6422500	7669900	7897400	7488400	6390300	7389500	11355000	7813900	9816800	6598900	6619800	7474700	6158300	7354500	7466000	8534600	7085900	8016400	8639200	7500100	8736300	8422400	7620600	8588400	7319800	7496900	7294300	7121900	4192600	5390000
pmb0746	527.15	331	526.148	C27H26O11	[M+H]+	Tricin 4'-O-β-guaiacylglycerol*	Flavonoids	Flavonoid	-	A	26013000	31329000	31119000	28686000	20914000	24141000	36952000	24487000	31419000	20024000	15738000	20333000	24435000	29128000	31600000	31693000	25519000	30256000	26760000	27712000	30940000	30944000	24919000	32253000	26748000	27440000	27678000	26516000	16183000	20289000
pmb2833	529.16	193.1	530.164	C23H30O14	[M-H]-	3-O-Feruloyl quinic acid glucoside	Phenolic acids	Phenolic acids	-	A	41756	48343	53274	49298	74800	64563	108610	76155	88965	127900	117020	129550	69451	58230	70615	53634	79009	75982	69921	57792	75786	116220	137620	123060	113980	77950	93111	87003	129280	122400
pmb0654	535.14	481.1	534.137	C25H26O13	[M+H]+	Apigenin di-C,C-pentoside	Flavonoids	Flavonoid	-	A	1065100	1164800	1105200	724840	766750	758680	895510	656610	814340	914950	619410	792020	1065400	692420	878580	687300	779040	667390	686730	813560	775930	788610	1075800	792690	825540	817870	812590	815030	634660	838190
mws0092	533.2	371	534.21	C27H34O11	[M-H]-	Arctiin	Lignans and Coumarins	Lignans	20362-31-6	B	1785.7	2172.2	2560.7	6139	5506.3	3417.2	5312.5	5886.5	5262.6	6489	5544	7900.3	2855.1	1204.9	3247.9	4993.2	6081.2	4778.7	7938	8927.3	6846.9	8525.6	7292.3	6859.1	9	9	1887.4	5260.4	7689.6	6450.7
Lmhp009890	546.36	184.07	545.348	C28H52NO7P	[M+H]+	LysoPC 20:3	Lipids	LPC	-	B	235940	228490	242210	366820	249240	348770	315610	295560	287610	184340	283980	243610	186730	152980	185050	226300	179560	206330	239380	264050	235520	220270	230870	224960	328710	268800	300830	309280	615800	404590
pmb0608	549.12	301.4	548.117	C25H24O14	[M+H]+	Chrysoeriol-O-malonylhexoside	Flavonoids	Flavonoid	-	A	1256900	1507300	1400300	1276900	1450800	1456300	1040300	1046600	1068900	1088000	1206900	1212500	1897100	1886900	2072200	2295300	2021500	2374000	2123300	2184600	2051000	2035800	2125000	2228600	1446200	1206400	1368800	1320000	1249100	1299200
pmn001672	547.17	223.1	548.174	C23H32O15	[M-H]-	β-D-Furanofructosyl-α-D-(3-mustard acyl)glucoside	Phenolic acids	Phenolic acids	-	B	26061	27680	17912	18223	20680	23999	17236	34433	26824	26476	26381	28189	22853	14950	15871	24933	19782	26784	38919	25455	26297	33042	33045	32010	15228	22663	27612	26076	18434	24780
Lmhp011549	550.39	184.07	549.379	C28H56NO7P	[M+H]+	LysoPC 20:1	Lipids	LPC	-	B	120010	170950	127870	477710	515620	468720	387700	384600	361800	527160	553290	503650	174980	89864	121090	155950	134900	139000	229120	254780	205940	82889	368540	179910	186230	246590	200150	245470	224350	231760
pma0702	558.28	207.07	557.274	C29H39N3O8	[M+H]+	N,N'-Bis(Sinapoyl)Spermidine	Alkaloids	Phenolamine	-	B	17953	33499	22305	27701	35283	39007	11697	11773	12916	24933	29192	19858	7580.1	7177.4	7435.6	20388	7581.1	14892	15704	14017	16608	25030	16261	24593	20861	27493	22873	15753	6234.6	8554.4
pmb3032	561.12	329.1	562.132	C26H26O14	[M-H]-	Tricin O-malonyl rhamnoside	Flavonoids	Flavonoid	-	A	1625500	1905500	2155100	1697700	1495200	1739000	2316600	1780000	2022600	1485600	1481900	1665000	1687600	2100100	2123900	2133500	1960100	2147800	1968600	1933400	2008400	2089700	1896200	2038500	1806100	1750100	1868600	1719400	968610	1214900
Rfmb25702	561.2	357.13	562.205	C28H34O12	[M-H]-	Pinoresinol-acetylglucose	Lignans and Coumarins	Lignans	-	A	161820	191700	184520	90684	103810	109250	107790	43968	63411	74244	60737	85915	205600	290570	251210	141970	122610	134240	96215	120500	123950	96863	117250	99606	204290	220280	229900	78278	58217	61135
mws1292	565.16	409.09	564.123	C26H28O14	[M+H]+	Isoschaftoside*	Flavonoids	Flavonoid carbonoside	52012-29-0	A	35026000	37364000	37668000	34444000	36426000	36710000	27789000	32899000	35004000	34966000	33321000	36159000	33641000	31241000	33832000	35638000	32038000	36302000	33224000	35875000	34598000	34075000	31429000	33739000	33027000	31247000	30729000	35079000	34703000	34065000
mws1660	565.16	529.13	564.123	C26H28O14	[M+H]+	Schaftoside*	Flavonoids	Flavonoid carbonoside	51938-32-0	A	537160	543040	637900	533740	587940	567450	514940	551090	527620	543590	558300	574820	401670	444410	443820	471600	472350	477960	471410	504580	487900	474960	433730	445940	511180	524180	530000	581490	516810	520790
pmb2922	565.05	323.1	566.055	C15H24N2O17P2	[M-H]-	Uridine 5'-diphospho-D-glucose	Nucleotides and derivatives	Nucleotides and derivatives	133-89-1	B	1637300	2018000	1934300	883910	737180	757260	871090	812000	987970	967740	1074400	1137000	1681900	1598700	1656000	711190	811870	749310	812830	833720	772130	1111200	771180	982220	1619600	1703200	1668200	1101800	515880	608370
Xmzp009846	576.36	184.07	575.311	C32H41N5O5	[M+H]+	A-ergocryptine	Alkaloids	Alkaloids	511-09-1	B	64822	54368	53368	255080	208610	226960	216260	162670	168860	251190	381460	275560	149100	48732	85106	116890	116510	127710	173850	214910	166760	97642	401940	201120	88356	89396	83071	143050	104070	97808
pmp000237	579.13	283.06	578.127	C26H26O15	[M+H]+	Apigenin-6-C-2-glucuronylxyloside	Flavonoids	Flavonoid carbonoside	-	B	22917000	19544000	22676000	20625000	22172000	21879000	11920000	15908000	13393000	18564000	19660000	19097000	19915000	21242000	22205000	23665000	20880000	22690000	18673000	19112000	21903000	19211000	15510000	18683000	23757000	15618000	19657000	16462000	19391000	17883000
pmb0720	579.13	331.1	578.127	C26H26O15	[M+H]+	Tricin 7-O-(6''-O-Malonyl)-Beta-D-Glucoside	Flavonoids	Flavonoid	-	B	5027700	5720400	6079800	5482000	5624200	5596000	6217300	5233400	5290700	4682800	5301500	5264100	5324300	5385000	5598100	5293200	5611500	6092700	5727200	5187400	4990600	5215300	5769100	5428600	5084600	5018700	5215200	5105600	4148500	4770900
Lmgp004474	579.17	271.06	578.164	C27H30O14	[M+H]+	5,7,4'-trihydroxy isoflavone-7-O-galactoside-rhamnose	Flavonoids	Isoflavones	-	B	1054300	1211100	1149400	899410	1004000	996370	672550	866690	798990	807780	811210	778680	1719500	1689100	1806200	1540200	1593200	1504300	1546700	1608300	1567400	1638100	1905200	1706100	884680	716840	841480	468560	410800	436960
pme3227	579.17	433	578.164	C27H30O14	[M+H]+	Vitexin 2''-O-rhamnoside	Flavonoids	Flavonoid carbonoside	64820-99-1	A	2292900	2149200	2297800	2013800	2668900	2221700	1120400	1531800	1417600	2096300	1899500	2027500	2121700	2471200	2436100	2627300	2104200	2548000	2113600	2152200	2166300	1982100	1467900	1970100	2650700	1723500	2322400	1555600	1974100	1768200
HJAP009	581.14	449.1	580.142	C26H28O15	[M+H]+	Luteolin-O-pentoside-C-glucoside	Flavonoids	Flavonoid	-	B	2100400	2510200	2319300	1488400	1403200	1478400	661110	359590	488550	1070000	964980	1122500	7161900	7034000	7503800	3131300	3363500	3061000	2270700	2451900	2425400	3496700	2718100	2916200	2404600	2608900	2596800	1347000	745600	1120500
pmb0566	581.15	383.2	580.143	C26H28O15	[M+H]+	Luteolin-O-hexosyl-O-pentoside	Flavonoids	Flavonoid	-	B	12829	17345	13194	9059.2	11270	9096.3	6451.6	4836.5	5080.1	9824.6	8413.3	8254.8	52877	35465	53812	20270	30638	20908	15893	34286	13978	23815	26217	23042	20959	14511	12217	11040	7789.2	8884.1
pmb0631	581.15	515.4	580.143	C26H28O15	[M+H]+	C-Hexosyl-luteolin C-pentoside	Flavonoids	Flavonoid carbonoside	-	B	3186600	4389000	4331100	3540800	3369300	3989700	2563100	2181100	2454500	3333200	3162900	3308400	5231400	4510400	5797900	4948500	5089300	5428700	4824400	5215000	5123500	4556500	5224900	5774900	3207800	4276200	3592300	4654400	2697600	3514400
Xmzn007677	580.36	506.33	581.264	C33H35N5O5	[M-H]-	Ergotamine	Alkaloids	Alkaloids	113-15-5	B	852040	1236000	1089100	1125800	1126700	1408200	622710	583120	713830	885040	1104100	1119100	774000	959100	986900	960350	530380	762730	917470	856980	949710	365870	1330300	797320	1743300	1843800	1952300	773170	1348600	1094800
pmb0492	584.28	325	583.268	C34H37N3O6	[M+H]+	N',N'',N'''-p-Coumaroyl-cinnamoyl-caffeoyl spermidine	Alkaloids	Phenolamine	-	B	33957	59262	58437	108100	125190	117330	70448	48180	62604	62282	21230	53240	110820	82671	104050	106790	125040	146950	68444	47089	59357	17631	170190	102970	150760	121380	144650	62296	165210	129450
pmb2936	591.17	367.2	592.179	C28H32O14	[M-H]-	Disinapoyl hexoside	Phenolic acids	Phenolic acids	-	B	56995	33931	55974	23191	30066	26964	11668	12230	13181	7644.8	7250.9	7321.1	79456	88396	84654	96294	202520	162420	92052	78576	81652	130780	83044	104630	68981	70421	70794	35262	12445	23951
pmb2586	593.13	285.6	594.137	C30H26O13	[M-H]-	Gallocatechin-catechin	Flavonoids	Flavanols	-	B	37507	34016	50008	32389	41060	43785	17130	13039	17423	38476	41429	51066	93117	66275	61571	59826	45020	39674	48273	52413	58846	43199	56510	62572	49854	53753	51805	38942	45042	39592
Zmhp002798	595.17	433.12	594.158	C27H30O15	[M+H]+	Isosaponarin	Flavonoids	Flavonoid	19416-87-6	A	29684000	26932000	31092000	22935000	26912000	25841000	14144000	13809000	14199000	22298000	20597000	23032000	35927000	36274000	37521000	33581000	31121000	32947000	26210000	27592000	29104000	27088000	19244000	23087000	32731000	23456000	28672000	16204000	22321000	20199000
pmp001106	595.17	577.16	594.158	C27H30O15	[M+H]+	Vitexin-2-O-D-glucopyranoside	Flavonoids	Flavonoid carbonoside	-	A	1532800	1387900	1484600	1276300	1591700	1512300	937310	1022200	1033800	1357200	1240900	1249300	638590	694670	680560	824370	675290	727720	656450	718900	750620	771280	626020	635430	1111100	853950	1110500	1060300	1129900	989690
pme1605	593.15	285	594.158	C27H30O15	[M-H]-	Kaempferol-3-O-robinobioside(Biorobin)	Flavonoids	Flavonols	17297-56-2	B	10040	39064	25179	12355	14852	14029	3987.9	5471.4	6281.8	9858.7	14622	11679	48281	65273	41268	45540	32329	26064	21143	5134.3	15824	35222	28238	22190	25136	26901	28424	8767.5	7437.7	12225
pme1665	593.15	311	594.158	C27H30O15	[M-H]-	Isovitexin 7-O-glucoside(Saponarin)	Flavonoids	Flavonoid carbonoside	20310-89-8	A	1076000	865450	1093800	1034900	1264200	1263400	505690	570160	543020	961880	838990	885100	1192200	1329900	1337000	1964100	1445300	1605300	1341400	1405100	1244100	1220100	901790	1060700	1284500	1022300	1175600	655640	753810	827960
pmn001713	593.15	473.11	594.158	C27H30O15	[M-H]-	Luteolin-7-O-rutinoside	Flavonoids	Flavonoid	3563-98-2	A	881470	827350	780870	841310	967510	787370	446430	692770	607990	821180	656170	786500	335900	299550	325010	417560	330480	297590	269700	369150	344250	388070	344530	334520	670760	509660	655840	590170	689180	623070
pmb0653	595.17	415.1	594.158	C27H30O15	[M+H]+	Apigenin-Di-C,C-hexoside	Flavonoids	Flavonoid	-	A	19509000	17170000	20275000	14177000	18206000	17521000	8674600	8304300	8345900	15395000	13687000	14798000	24442000	26702000	28194000	24664000	21680000	23384000	18573000	17928000	18708000	16497000	12807000	16165000	21755000	14882000	20083000	10778000	14573000	13145000
Lmpp003789	595.14	287.06	595.145	C30H27O13+	[M]+	Cyanidin-3-O-(6''-p-Coumaroylglucoside)	Flavonoids	Anthocyanins	-	B	50803	62075	54438	57214	54746	58238	135500	77513	101640	56906	87283	68145	72582	131940	90906	166530	85340	87435	95105	97882	103990	101450	116180	123050	42047	43761	43942	40078	42400	37003
Lmpp003977	609.16	301.07	609.16	C31H29O13+	[M]+	Peonidin-3-(6''-p-Coumaroylglucoside)	Flavonoids	Anthocyanins	-	B	213340	235190	234590	151230	184850	188500	127620	224210	167040	156500	166360	156420	196520	133660	163260	137200	138160	149310	157960	138440	161300	137290	128590	141620	134850	225080	181120	159010	119690	139850
HJAP008	611.15	449.11	610.153	C27H30O16	[M+H]+	Luteolin-O-glucoside-C-glucoside	Flavonoids	Flavonoid	-	B	15039000	18396000	17152000	14735000	15173000	15318000	6634200	2885800	4732700	10069000	10388000	10714000	36555000	34251000	36092000	31575000	27832000	30090000	21312000	24332000	22211000	24390000	23540000	23492000	17149000	19587000	16726000	11683000	8606900	10776000
pmb0624	611.16	431.3	610.153	C27H30O16	[M+H]+	6-C-Hexosyl-luteolin O-hexoside	Flavonoids	Flavonoid carbonoside	-	A	734620	996250	844920	630220	643640	693180	340480	153270	239100	397270	327890	400720	2702400	2172100	2810900	1482000	1504600	1502800	816230	1106000	936410	967680	951570	1001000	970950	1197800	1017700	576710	197580	360040
pmn001583	609.15	300	610.153	C27H30O16	[M-H]-	Quercetin-3-O-robinobioside	Flavonoids	Flavonols	52525-35-6	A	57856	56433	71903	39285	56710	35517	48349	41815	41559	33675	83692	33738	64613	251620	62320	362040	62294	52929	61996	55788	67090	62972	82895	61593	49668	43068	46607	39579	31607	32263
mws0059	609.15	301	610.153	C27H30O16	[M-H]-	Quercetin-3-O-rutinoside (Rutin)	Flavonoids	Flavonols	153-18-4	B	43623	54542	60984	37795	33786	41558	36205	33091	33100	23471	62183	29964	53444	200310	57452	316860	56239	51274	46434	49142	64524	50379	64687	52098	47620	35461	50130	30011	22917	21213
Smsp001640	611.16	317.07	611.161	C27H31O16+	[M]+	Petunidin-3-O-glucoside-O-arabinoside	Flavonoids	Anthocyanins	-	B	6511.2	9	2915.2	320130	361770	351980	379460	530540	538010	677360	593560	679140	9583.6	9	4503.3	125390	171250	222410	176420	196060	202100	180520	144490	199120	3085.2	3744.3	2433.7	646740	270130	377300
pmb3264	611.1	306.2	612.152	C20H32N6O12S2	[M-H]-	Oxiglutatione	Amino acids and derivatives	Amino acids and derivatives	27025-41-8	A	200120	272110	274250	93095	74051	115170	55886	54531	54565	60781	56446	62607	183120	207090	207430	107690	61818	72662	74171	72480	89814	85670	104030	97274	216970	204240	241520	120820	125330	118240
Rfmb26201	621.22	417.16	622.226	C30H38O14	[M-H]-	Syringaresinol-aceGlu	Lignans and Coumarins	Lignans	-	B	136320	107850	151420	214590	259300	198890	315000	364870	353900	299720	238260	319900	179350	170570	175610	234540	246960	247030	390530	340680	380640	329990	417900	369750	349490	290600	300040	246790	420830	376210
Lmpp003815	625.16	317.07	625.155	C31H29O14+	[M]+	Petunidin-3-(6''-p-Coumaroylglucoside)	Flavonoids	Anthocyanins	-	B	150680	197030	187760	153140	166210	144920	232310	214280	214240	140970	140760	155570	207440	223360	197270	278060	297450	268800	291810	304560	296650	279800	387840	331880	104910	169900	142270	135090	96840	110470
Hmyp007792	636.41	495.4	635.414	C32H62NO9P	[M+H]+	PE(oxo-11:0/16:0)	Lipids	Glycerol ester	-	B	140970	162980	98472	160850	154820	108330	163610	169010	190920	165310	160760	154980	111450	107540	114270	135400	177890	157870	143240	136540	132830	113240	138550	138400	95608	108280	91301	147790	197950	159630
Hmgp003086	639.19	331.09	638.184	C29H34O16	[M+H]+	Tricin-O-rutinoside	Flavonoids	Flavonoid	-	B	12007000	13878000	13296000	14673000	14414000	14672000	12059000	14666000	14461000	13966000	13221000	14280000	13699000	13543000	14793000	16038000	15237000	17052000	18943000	17625000	18418000	17622000	18224000	20350000	12021000	15471000	13228000	14218000	10229000	12426000
Lmpp003958	639.17	331.08	639.171	C32H31O14+	[M]+	Malvidin-3-(6''-p-Coumaroylglucoside)	Flavonoids	Anthocyanins	-	B	10916000	13230000	12903000	13889000	14193000	14133000	11508000	13763000	13609000	13754000	12755000	15109000	13944000	13589000	15265000	16580000	15790000	15494000	17270000	16527000	18927000	18471000	16989000	20443000	11931000	15548000	12996000	14063000	10331000	12343000
pmb2653	649.1	145	650.227	C24H42O20	[M-H]-	D(+)-Melezitose O-rhamnoside	Others	Saccharides and Alcohols	-	B	29563	15220	31472	7216.7	11531	12780	32873	35267	36202	12101	15394	13816	35439	30445	32869	23840	20792	26215	19204	23510	25565	18603	16630	24177	34931	31111	27768	21045	15026	14000
Hmgp002953	653.17	331.09	652.164	C29H32O17	[M+H]+	Tricin-O-glucuronate-O-rhamnoside	Flavonoids	Flavonoid	-	B	17102	24891	21421	32684	23088	21806	24715	28060	26468	19343	24690	22170	25822	27455	22438	27183	20276	23316	28056	23572	31383	23693	20946	19371	29026	27308	24977	26853	26731	22563
pmb0578	655.17	207	654.158	C32H30O15	[M+H]+	Luteolin-O-sinapoylhexoside	Flavonoids	Flavonoid	-	B	204200	213100	238180	109010	104380	111980	74595	57760	76658	78528	73111	79043	1562100	1284000	1631600	850840	1247900	1202500	1046600	1154900	1093500	931990	880640	1102800	379820	316440	316850	210110	99203	175580
pmb0684	655.17	207.2	654.158	C32H30O15	[M+H]+	C-Hexosyl-luteolin O-sinapic acid	Flavonoids	Flavonoid carbonoside	-	A	173340	209660	214250	104280	84328	99974	71922	48717	53176	68190	66403	69647	1495700	1193200	1414900	1018200	1072800	1063500	939500	1002600	967360	929120	892890	938380	329910	254870	300440	223320	98029	144660
pmb0713	655.19	331.2	654.18	C29H34O17	[M+H]+	Tricin 7-O-hexosyl-O-hexoside	Flavonoids	Flavonoid	-	A	686230	1012500	871950	853110	1046400	939100	991020	1564500	1299100	1071300	1200200	1246100	580940	625240	657470	906070	1051500	924040	1013000	835770	966190	1192800	1121000	1031300	674960	814510	723960	792320	589680	608610
pmb0716	655.19	330.9	654.18	C29H34O17	[M+H]+	Tricin di-O-hexoside	Flavonoids	Flavonoid	-	A	98460	98986	92318	39639	41348	38569	48533	74954	49017	36732	45452	46345	145960	169490	168580	96241	102940	93073	96186	99112	94503	75950	64025	72122	147950	123030	127200	39919	44805	51979
Lmnp002616	655.19	493.14	654.18	C29H34O17	[M+H]+	5,3',4'-trihydroxy-6,7-dimethoxyflavone-8-C-[β-D-glucosyl-(1-2)]-β-D-glucoside	Flavonoids	Flavonoid carbonoside	-	B	1711100	2030900	1463500	994980	905600	916400	1050300	1787700	1378800	963890	775960	1048800	2394900	3423000	3051600	1628500	1343200	1382900	1103800	1075000	1132000	1122700	1032100	1202400	2439200	2129500	2076900	822550	489360	680500
pmb0739	659.2	331	658.19	C32H34O15	[M+H]+	Tricin O-hexosyl-O-syringin alcohol	Flavonoids	Flavonoid	-	A	768410	684780	780790	977190	1007500	1001400	1331800	1267100	1279400	976080	966000	1013300	491220	450250	510650	678510	739360	732340	684200	719520	693670	592410	605650	623530	365740	487750	420900	820900	544490	692590
pmb0719	659.2	331.1	658.19	C32H34O15	[M+H]+	Tricin 4'-O-(syringyl alcohol)ether 5-O-hexoside	Flavonoids	Flavonoid	-	A	1324500	1600700	1585000	1034700	897610	1007200	1079400	2414800	1673100	1102300	1385400	1223200	1182800	1231100	1316900	790650	1106000	1069900	954940	939660	1007500	805900	744960	761810	1106500	1267600	1324600	1267000	873680	1115400
pmb0530	664.12	136.2	663.109	C21H27N7O14P2	[M+H]+	Nicotinic acid adenine dinucleotide	Nucleotides and derivatives	Nucleotides and derivatives	53-84-9	B	1256500	1394100	1577100	950660	834090	1030100	892780	1019700	1107200	1298400	1190700	1527200	1282500	1229200	1490800	926370	1020500	981380	1431700	1180700	1280400	1084500	1139600	1244200	1184500	1470100	1403300	1084700	705690	911480
pmb0579	669.18	207	668.174	C33H32O15	[M+H]+	Chrysoeriol-O-sinapoylhexoside	Flavonoids	Flavonoid	-	A	208850	182740	213160	164950	156740	153070	126150	120300	111250	145000	126200	129640	807360	733330	798140	804480	1117800	995550	913170	940430	935200	915070	982410	878860	330150	274030	291000	445170	248450	318270
pmb0475	671.18	509	670.174	C29H34O18	[M+H]+	Gallic acid O-feruloyl-O-hexosyl-O-hexoside	Tannins	Tannin	-	A	6228800	7045500	7243900	5464500	5568700	5368200	7290700	7474900	8155800	5208900	5350300	5609100	5189900	5269900	6139300	5764700	7008600	6416500	6245900	5854900	6204800	6658800	5106200	6917000	6215500	7225500	6627100	6388600	5088900	5131900
pmp001275	672.42	331.29	671.409	C31H61O14N	[M+H]+	3-Hydroxypropyl palmitate glc-glucosamine	Alkaloids	Alkaloids	-	A	323700	440650	417250	377650	358330	364600	362710	198910	337540	239810	219250	256070	493340	555330	572050	515670	376920	518280	481910	414250	467570	329940	693310	474460	584320	436490	708010	382820	439870	383440
Lmxp010913	676.45	184.08	675.448	C35H66NO9P	[M+H]+	1-(9Z-octadecenoyl)-2-(9-oxo-nonanoyl)-sn-glycero-3-phosphocholine	Lipids	Glycerol ester	-	B	252700	263260	279870	87887	96775	90184	118600	152390	148190	189520	187300	194210	265300	254470	380990	116050	249930	210930	98020	85675	102290	197730	103500	200770	242210	265320	268050	138070	59695	103690
Lmhp008513	677.37	261.22	676.367	C33H56O14	[M+H]+	2-γ-Linolenoyl-glycerol-diglucoside	Lipids	Glycerol ester	-	B	1308200	1708100	995510	1571100	1781200	1951400	1450400	796600	1217000	1727100	1399100	1515600	1350200	1390300	1140600	1157300	784720	1049700	1242600	974790	1530100	937730	1628600	1238700	1470800	1037500	1196000	1222200	708630	742900
pmp001276	677.37	677.37	676.367	C33H56O14	[M+H]+	2,3-Dihydroxypropyl-9,12,15-octadecatrienoate-hexose-hexose	Lipids	Free fatty acids	-	A	392970	554260	420860	596720	599870	602230	623230	282550	460630	380110	327370	409140	623750	587170	663190	694660	478190	507190	576540	651970	682120	439370	948280	660190	726520	603560	593130	437710	652480	565200
Lmhp009190	679.39	263.24	678.383	C33H58O14	[M+H]+	2-Linoleoylglycerol-diglucoside	Lipids	Glycerol ester	-	B	130960	147460	85663	246090	275120	237220	158710	117900	181660	248150	207330	245230	150210	139920	158310	165830	88249	91910	122960	213800	171690	68424	229970	123780	69668	86201	88694	113950	73124	86155
Hmgp002564	683.15	331.08	682.138	C29H30O19	[M+H]+	Tricin 7-O-Diglucuronoside	Flavonoids	Flavonoid	83097-44-3	B	9	19049	6555.7	9	9	9	37211	9	16290	6704.2	7841.4	4414.7	10929	31678	13744	52533	25006	27111	25022	19458	26841	19560	35377	27995	9	9	9	9	9	9
pmn001370	681.24	519.19	682.247	C32H42O16	[M-H]-	Pinoresinol diglucoside	Lignans and Coumarins	Lignans	63902-38-5	B	67768	77310	78634	46163	44706	58108	31085	30441	46556	31648	37908	39566	40892	62715	75064	51943	39868	43324	23382	40561	27654	48806	33200	28233	102800	88225	87754	22408	30193	35363
pmf0287	686.1	339	687.149	C21H33N7O13P2S-2	[M-H]-	3'-dephospho-CoA	Nucleotides and derivatives	Nucleotides and derivatives	3633-59-8	B	70342	92938	86670	113200	111170	128070	103430	98532	105690	181180	172930	158080	108670	66252	95100	105490	86509	92247	145960	116580	124360	99794	150760	123800	83143	119100	93230	111170	84879	88928
pmb1312	689.21	331.2	688.2	C33H36O16	[M+H]+	Tricin 4'-O-(β-guaiacylglyceryl)ether 7-O-glucoside	Flavonoids	Flavonoid	-	A	25786000	25730000	27556000	15840000	13638000	13803000	19052000	22218000	20736000	15886000	16674000	16896000	23312000	24987000	26946000	16758000	21689000	19113000	15791000	17958000	18382000	17056000	16541000	17036000	21649000	23396000	22619000	16344000	10991000	13382000
pmb0738	699.19	331.1	698.185	C34H34O16	[M+H]+	Tricin 7-O-[sinapoyl]-glucoside	Flavonoids	Flavonoid	-	A	140260	174730	173980	222530	181030	147990	173320	127720	150090	153730	112530	169130	258810	312010	386050	907320	672300	897460	910850	746670	1026600	737180	667610	911000	196840	232040	175980	226700	118010	189260
pmn001369	697.23	535.18	698.242	C32H42O17	[M-H]-	1-Hydroxypineolin Diglucoside	Lignans and Coumarins	Lignans	-	B	5496.8	7923.9	4541.1	4308.4	10255	8655.4	13624	3075.7	6708.1	6590.1	6548.9	5242.2	11566	16747	17726	19147	19177	12220	16416	18144	22727	25248	19375	19872	5658.7	11835	10154	11237	9461.1	8014
Hmyp007396	702.46	184.07	701.46	C37H68NO9P	[M+H]+	PC(oxo-11:0/18:2)	Lipids	PC	-	B	135060	129400	160110	121200	162560	147760	190680	227160	195050	168630	189100	168270	169050	148020	203170	127460	174960	159950	121370	129480	119530	110060	115870	120080	182660	194920	196280	140030	133180	156100
pmb3039	703.13	329.2	704.138	C35H28O16	[M-H]-	Tricin O-oxalic acid O-coumaroyl shikimic acid	Flavonoids	Flavonoid	-	A	480190	545490	493050	437150	364900	411750	878670	549350	648570	369750	365880	410050	463140	584150	582090	585260	559600	580600	547200	531780	595610	627940	539320	654010	482140	498700	479250	488350	249480	335480
Lmmp006540	713.17	331.08	712.164	C34H32O17	[M+H]+	Tricin 7-O-GlcA-2-O-Sinapoyl	Flavonoids	Flavonoid	-	B	2114	2772.9	2620	30969	18278	23117	30245	34192	33694	36891	39217	42014	3523.8	9	2060	16887	24570	21414	34646	26769	32068	32309	36764	30170	2218.4	3042.5	2635.9	34670	23535	32457
pmb2991	739.21	269.2	740.216	C33H40O19	[M-H]-	Apigenin O-hexosyl-O-rutinoside	Flavonoids	Flavonoid	-	B	45962	42541	51635	45165	51421	48764	38669	74973	63251	55398	46221	65994	69794	85055	88742	79318	97308	97710	85265	95131	90542	88216	125730	102810	44806	36979	34589	40969	33848	42650
pme2651	742.1	620.1	743.075	C21H28N7O17P3	[M-H]-	NADP (Nicotinamide adenine dinucleotide phosphate)	Nucleotides and derivatives	Nucleotides and derivatives	53-59-8	B	460880	359270	561740	158750	103120	139470	227890	134490	131260	124790	220870	173420	241150	391160	401630	198350	237270	231870	128860	146450	112440	297060	166390	215090	339920	331660	397060	262730	138190	207030
pmb0667	757.2	177.1	756.19	C36H36O18	[M+H]+	C-hexosyl-luteolin O-feruloylpentoside	Flavonoids	Flavonoid carbonoside	-	A	1109800	1545200	1357400	118810	149010	139130	152440	22516	71067	55556	76196	85262	7901200	8392500	8320300	1771100	1652600	1585900	707680	548240	702460	1135600	673580	988130	1351700	1385200	1304200	63073	56186	46240
pmb0613	757.22	577.2	756.211	C33H40O20	[M+H]+	Apigenin 6-C-hexosyl-8-C-hexosyl-O-hexoside	Flavonoids	Flavonoid	-	A	47528	56235	61077	49185	49902	48884	30705	45768	42435	41719	54716	56904	156110	115030	156970	134670	107890	144940	112530	120800	119980	91598	68373	91705	69265	50000	57267	33878	35555	28957
pmb0639	757.22	595.2	756.211	C33H40O20	[M+H]+	8-C-Hexosyl-apigenin O-hexosyl-O-hexoside	Flavonoids	Flavonoid carbonoside	-	B	129880	115260	163270	144450	165800	165700	74780	115970	100340	159440	113900	164520	183570	186730	227710	225680	163590	252870	157260	154090	176910	152540	102140	135350	128960	86053	68548	45698	93194	110350
pmb0678	771.21	177.1	770.206	C37H38O18	[M+H]+	8-C-Hexosyl-apigenin O-feruloylhexoside	Flavonoids	Flavonoid carbonoside	-	B	5346500	5920600	6248900	2305900	2377100	2154700	1416000	350660	861700	858030	783720	951140	13751000	14884000	15077000	8371000	6756400	8167200	4491800	4524400	4758100	5045400	3547400	4880100	5690200	6962300	5846400	1518500	1750100	1637800
pmp001314	773.21	627.2	772.206	C33H40O21	[M+H]+	6-Hydroxykaempferol-3-O-rutin-6-O-glucoside	Flavonoids	Flavonols	-	B	36182	43276	39807	34830	41912	37695	25243	12665	20776	35929	33100	42301	43708	40053	57786	37414	51054	38369	43196	36307	45511	35023	34145	33255	34414	36790	48515	36958	20805	27441
Hmgp003540	775.21	527.15	774.2	C36H38O19	[M+H]+	Tricin-O-Malonyl-O-guaiacylglycerol-O-Hexoside	Flavonoids	Flavonoid	-	A	7197900	8186400	8156900	7342600	7631800	8408100	9008100	9631300	9256400	6981200	7617800	7825400	7715800	8447400	9271800	7409700	7932500	8920400	7309800	6849900	7011800	7018300	6097600	6961100	7450100	7659000	8074200	8332900	7269300	7837800
pme2746	784.15	437	785.157	C27H33N9O15P2	[M-H]-	Flavin adenine dinucleotide(FAD)	Nucleotides and derivatives	Nucleotides and derivatives	146-14-5	A	581570	633190	675020	413270	424320	444160	406020	328700	398370	460230	478940	467360	545340	714720	733440	468980	505960	547800	478220	500200	498420	444720	488510	465470	759340	791350	768200	428690	843140	938370
Lmgp004305	801.25	493.13	800.238	C35H44O21	[M+H]+	5,7,4'-trihydroxy-6,8-dimethoxy isoflavone-7-O-galactoside-glucose-rhamnose	Flavonoids	Isoflavones	-	B	46377	33361	38438	33212	42913	39474	56097	77356	80585	54335	60689	54605	36579	47729	41670	62863	75474	62590	61047	74967	90144	56332	72968	64792	35248	46283	38181	33030	45224	43013
a Primary class of the metabolites
b Secondary class of the metabolites
c CAS Registry Number
d Identification level of the metabolites, A: the secondary mass spectrometry of the sample substance and retention time (RT) of the metablites are consistent with the database; B: The precursor ion molecular weight(Q1), characteristic fragment ions (Q3), RT, declustering potential (DP), and collision energy (CE) of the metablites are consistent with the database
